# Supplementary material for: The plasma peptides of sepsis
Source: Clin Proteomics. 2020 Jul 2;17:26. doi: 10.1186/s12014-020-09288-5 (PMC7331219; doi:10.1186/s12014-020-09288-5)
Supplement: Supplementary file 1 — Additional file 1: Table S1. The tryptic peptides with Chi square FDR q-values. [file 12014_2020_9288_MOESM1_ESM.xlsx]

## Sheet: Sheet1
AARS	number of nodes: 484 number of edges: 1147 average node degree: 4.74 avg. local clustering coefficient: 0.324 expected number of edges: 850 PPI enrichment p-value: < 1.0e-16
ABCF1
ABLIM2
ACAN
ACAP2
ACHE
ADAMTS20
ADAMTS7
ADAMTSL1
ADCY9
AF-4
AFF1
AGL
AGTPBP1
AHDC1
AHI1
AIM1L
AKAP3
ALS2CR11
AMOTL1
ANKRD12
ANKRD26
ANKRD32
ANKRD36
ANKRD36C
ANKRD60
AP1G2
APC
APOL5
ARHGAP21
ARHGAP26
ARHGEF1
ARHGEF2
ARHGEF40
ARID4B
ASPM
ATAD3A
ATP4A
ATRX
BAZ2B
BCL11A
BICC1
BLM
BRCA1
BRD3
C17orf25
C17orf97
C3
CACNA1D
CACNA1E
CACNA1I
CACNB2
CAMTA1
CAND1
CANT1
CASP7
cB5E3.2
CBX6
CC2D1A
CCDC141
CCDC149
CCDC171
CCDC30
CCDC38
CCDC88B
CCL16
CCRN4L
CCT2
CDH23
CDK5RAP2
CENPC
CENPC1
CENPE
CENPT
CEP135
CEP164
CEP170B
CEP350
CEP85L
CHGB
CHMP7
CHTF18
CIC
CIC/DUX4
CIITA
CKAP5
CKMT1A
CKMT1B
CLASP1
CLIP4
CMYA5
CNOT10
CNTROB
COL16A1
COL1A1
COL24A1
COL24A1
COL6A1
COL6A3
COL6A5
CORO6
COX16
CPS1
CROCC
CROCC
CTNNA1
CUL4B
CWC15
CWC15
CYB5R1
CYP11B2
DCAF11
DCDC1
DCDC2C
DDX11
DDX31
DDX42
DENND4B
DENND5B
DEPDC7
DHX37
DIDO1
DIP2A
DISC1
DKFZp451G231
DKFZp451N061
DKFZp566H1924
DKFZP586J0619
DKFZp666G172
DKFZp686E2459
DKFZp686J1895
DKFZp686J22257
DKFZp686L19178
DKFZp686M1993
DKFZp686O12165
DKFZp781D08126
DLGAP5
DMD
DMXL1
DNA2
DNAH11
DNAH12
DNAH2
DNAH2
DNAH5
DNAH7
DNLZ
DOCK5
DOCK6
DOCK6
DOS
EFCAB4A
EFCAB5
EHBP1L1
EID2
EML4-ALK
EP400
EPHA1
EPHA10
EPS15L1
ESYT2
EVPL
EXD3
EYA2
EYS
FAM120B
FAM178A
FAM186A
FAM186A
FAM208B
FAN1
FANCI
FAT1
FAT3
FBN1
FBXO41
FBXO41
FER1L5
FEZF1
FGF2
FGFR2-BICC1
FHDC1
FHL1
FLG
FLJ10357
FLJ21069
FLNA
FMNL1
FMNL2
FN1
FN1
FNIP2
FREM1
FRY
FUS
FXR1
FXR1
FYCO1
FZD8
GAS2L3
GCK
GCN1L1
GIGYF2
GIT1
GLDN
GPHN
GPHRYN
GPR101
GPR124
GPR179
GPR98
GRAMD1B
GRB14
GREB1L
GRIN2A
GRIN2B
GRIN2D
GTF2H1
GTPBP2
GVINP1
HEATR1
HEATR5B
HECTD3
HECTD3
HECTD4
HES6
HES6
HEXA-AS1
HFM1
HIRIP3
HIVEP2
HLA-DRB1
HMGXB3
HNRNPR
HNRPR
HSD17B12
HSPA6
HSPA7
HSPG2
IFT140
IGF2BP1
IKBKE
INTS3
IRF8
ITIH3
ITPR2
JAK3
KANK1
KANK1
KAZN
KCNG3
KDM4C
KIAA0368
KIAA0430
KIAA1244
KIAA1671
KIDINS220
KIF16B
KIF24
KIF27
KIT
KIT
KSR1
KSR1
KSR2
LAMB4
LETM1
LLGL2
LMAN1
LOC100508782
LOC100653137
LOC100996720
LOC101927662
LOC101930111
LOC102725184
LOC730256
LONP1
LONRF2
LRIF1
LRP1B
LRP1B
LRP2
LRRC16A
LRRC48
LRRC9
LRRIQ1
LSM4
LY75
LY75
LY75-CD302
LY75-CD302
MACF1
MADD
MAGI1
MAGI3
MAP2
MAP3K2
MAP3K4
MAP4
MAP7D1
MARK3
MAST1
MAST2
MCCC1
MDN1
MED1
MIA3
MIBP1
MIBP1
MICAL3
MIS18BP1
MLK4
MLL
MLLT1
MLLT1
MOK
MORC2
MPDZ
MRPL10
MSR1
MTCH1
MTUS1
MTX1
MYH11
MYH2
MYH3
MYH3
MYO10
MYO1E
MYO1H
MYO5A
MYO5C
MYO6
MYO9A
MYOM2
MYOM3
NCAM2
NEDD4L
NFAT5
NLGN2
NLRP2
NLRP9
NOL10
NOS2
NPTN
NRF
NRXN2
NSUN7
OBSL1
OBSL1
OPA1
OSBPL7
OSGEPL1
PAICS
PARP8
PATZ1
PCYT2
PDE1A
PDE3B
PDZGEF1
PHF20L1
PHLDB2
PHLPP1
PI4KA
PIBF1
PIK4CA
PITPNM3
PKN3
PKP4
PLCE1
PLEKHG3
PLEKHM1
PLIN4
POLR1A
POLR1B
POM121C
POTEB
POTEB2
PPP1R13B
PPP1R15A
PREX1
PREX2
PRG4
PRIC295
PTPLB
PTPN7
PTPRA
PTPRA
PUS7L
PXDN
RAB36
RABGAP1
RABGAP1L
RAI1
RAPGEF2
RAPGEF5
RAPGEF6
RARG
RASA3
RASIP1
RB1
RBBP5
RBM17
RBM5
RELN
REM2
RGPD4
RGS22
RIMBP3B
RIMBP3C
RIPK1
RNASEL
RNF40
RPL4
RPRD2
RPS6KA2
RPS6KL1
RRBP1
RRP12
RSBN1
RXRB
SAA1
SAA1
SAA2
SAA2
SACS
SAMD11
SBF1
SBK1
SBNO1
SCN1A
SCN3A
SCN8A
SCN9A
SCYL1
SDCBP2
SDCBP2
SDK2
SEC16A
SEL1L3
SETBP1
SETD1A
SGSM2
SH3PXD2B
SHE
SLC8A2
SLIT2
SLK
SLTM
SLX4
SMC1A
SMC2
SMC4
SMEK1
SMG1
SMG6
SNTB1
SNTB1
SOGA1
SOGA3
SOX6
SPATA13
SPATA31C1
SPEG
SPIRE1
SPNS2
SPTBN1
SPTBN2
SRRT
STRIP2
STRIP2
STXBP2
SUPT6H
SUPV3L1
SYDE1
SYNE2
TACC3
TAF15
TAX1BP1
TBC1D15
TBC1D31
TBCD
TCEAL4
TCEB3B
TCOF1
TCOF1
TDRD3
TENM3
TEP1
TEX2
THOP1
THUMPD1
TKT
TMED8
TMF1
TNRC18
TNS1
TOP1
TOP3A
TOP3B
TOR4A
TP53BP2
TRIM2
TROPH
TRPM2
TRPM6
TSHR
TTC21A
TTC3
TTC3
TXNRD2
TXNRD2
U2SURP
UHRF1
ULK3
UNC13A
UNC45B
USP26
USP31
UTY
VAV2
VCP
VIPAS39
VLDLR
VPS13C
VPS8
VRK2
WDFY3
WDR44
WDR52
WDR62
WDTC1
XIRP2
XYLT1
YTHDC2
ZCCHC11
ZFAT
ZNF107
ZNF185
ZNF219
ZNF280D
ZNF300
ZNF316
ZNF318
ZNF441
ZNF462
ZNF556
ZNF609
ZNF66
ZNF675
ZNF729
ZSCAN31
ZZEF1
	Process
#term ID	term description	observed gene count	background gene count	false discovery rate	matching proteins in your network (IDs)	matching proteins in your network (labels)
GO:0007017	microtubule-based process	52	605	2.35e-10	ENSP00000245503,ENSP00000247191,ENSP00000257287,ENSP00000261839,ENSP00000263710,ENSP00000265104,ENSP00000265148,ENSP00000288235,ENSP00000296137,ENSP00000297814,ENSP00000311273,ENSP00000312554,ENSP00000317144,ENSP00000326550,ENSP00000343818,ENSP00000348349,ENSP00000349238,ENSP00000350719,ENSP00000353375,ENSP00000353508,ENSP00000354681,ENSP00000354837,ENSP00000355593,ENSP00000356379,ENSP00000356579…	ARHGAP21,ARHGEF2,ASPM,ATRX,BRCA1,CCDC88B,CDK5RAP2,CENPE,CEP135,CEP350,CKAP5,CLASP1,CNTROB,CROCC,DISC1,DLGAP5,DNAH11,DNAH12,DNAH2,DNAH5,DNAH7,FLNA,FYCO1,GAS2L3,IFT140,KIF16B,KIF24,KIF27,MAP2,MAP4,MAP7D1,MYH11,MYH2,MYH3,MYO10,MYO1E,MYO1H,MYO5A,MYO5C,MYO6,MYO9A,OBSL1,OPA1,PHLDB2,PIBF1,RGPD4,SLK,SPIRE1,SYNE2,TACC3,TTC21A,WDR62
GO:0016043	cellular component organization	198	5163	1.3e-08	ENSP00000171887,ENSP00000200453,ENSP00000202556,ENSP00000225964,ENSP00000245503,ENSP00000245907,ENSP00000247191,ENSP00000249344,ENSP00000251047,ENSP00000251472,ENSP00000252804,ENSP00000255882,ENSP00000256707,ENSP00000257287,ENSP00000257430,ENSP00000259335,ENSP00000259808,ENSP00000261441,ENSP00000261517,ENSP00000262101,ENSP00000262113,ENSP00000262519,ENSP00000262715,ENSP00000263710,ENSP00000263816…	ABLIM2,ACAN,ACHE,ADAMTS20,AGTPBP1,AHI1,APC,ARHGAP21,ARHGAP26,ARHGEF2,ARID4B,ASPM,ATRX,BAZ2B,BCL11A,BLM,BRCA1,BRD3,C3,CACNB2,CAND1,CBX6,CCDC88B,CCRN4L,CCT2,CDH23,CDK5RAP2,CENPC,CENPE,CENPT,CEP135,CEP164,CEP350,CHMP7,CKAP5,CLASP1,CNTROB,COL16A1,COL1A1,COL6A1,COL6A3,CORO6,COX16,CROCC,CTNNA1,CUL4B,DDX11,DISC1,DLGAP5,DMD,DMXL1,DNA2,DNAH5,DNAH7,DNLZ,EID2,EP400,EPHA1,EPS15L1,EYA2,FAT1,FBN1,FEZF1,FGF2,FL…
GO:0071840	cellular component organization or biogenesis	203	5342	1.3e-08	ENSP00000171887,ENSP00000200453,ENSP00000202556,ENSP00000225964,ENSP00000245503,ENSP00000245907,ENSP00000247191,ENSP00000249344,ENSP00000251047,ENSP00000251472,ENSP00000252804,ENSP00000255882,ENSP00000256707,ENSP00000257287,ENSP00000257430,ENSP00000259335,ENSP00000259808,ENSP00000261441,ENSP00000261517,ENSP00000262101,ENSP00000262113,ENSP00000262519,ENSP00000262715,ENSP00000263710,ENSP00000263816…	ABLIM2,ACAN,ACHE,ADAMTS20,AGTPBP1,AHI1,APC,ARHGAP21,ARHGAP26,ARHGEF2,ARID4B,ASPM,ATRX,BAZ2B,BCL11A,BLM,BRCA1,BRD3,C3,CACNB2,CAND1,CBX6,CCDC88B,CCRN4L,CCT2,CDH23,CDK5RAP2,CENPC,CENPE,CENPT,CEP135,CEP164,CEP350,CHMP7,CKAP5,CLASP1,CNTROB,COL16A1,COL1A1,COL6A1,COL6A3,CORO6,COX16,CROCC,CTNNA1,CUL4B,DDX11,DDX31,DHX37,DISC1,DLGAP5,DMD,DMXL1,DNA2,DNAH5,DNAH7,DNLZ,EID2,EP400,EPHA1,EPS15L1,EYA2,FAT1,FBN1,F…
GO:0007010	cytoskeleton organization	56	953	6.48e-06	ENSP00000249344,ENSP00000251472,ENSP00000255882,ENSP00000257287,ENSP00000262113,ENSP00000263710,ENSP00000265104,ENSP00000265148,ENSP00000274498,ENSP00000288135,ENSP00000288670,ENSP00000304669,ENSP00000311273,ENSP00000317144,ENSP00000326550,ENSP00000329219,ENSP00000331983,ENSP00000343818,ENSP00000344562,ENSP00000349238,ENSP00000349259,ENSP00000350719,ENSP00000353375,ENSP00000353508,ENSP00000354671…	ABLIM2,ARHGAP26,ARHGEF2,ASPM,ATRX,BRCA1,CCDC88B,CDK5RAP2,CENPE,CEP135,CEP350,CKAP5,CLASP1,CNTROB,CORO6,CROCC,CTNNA1,DISC1,DMD,DNAH5,DNAH7,FAT1,FLNA,FMNL1,FMNL2,FRY,GAS2L3,KIF24,KIT,LRRC16A,MAP2,MAP4,MAP7D1,MAST1,MAST2,MICAL3,MYH11,MYH3,MYOM2,MYOM3,OBSL1,PHLDB2,PI4KA,PIBF1,PLCE1,PREX1,RGPD4,SLK,SPIRE1,SPTBN1,SPTBN2,STRIP2,SYNE2,TACC3,WDR62,XIRP2
GO:0007018	microtubule-based movement	27	276	6.48e-06	ENSP00000245503,ENSP00000247191,ENSP00000261839,ENSP00000265104,ENSP00000265148,ENSP00000288235,ENSP00000296137,ENSP00000297814,ENSP00000311273,ENSP00000312554,ENSP00000348349,ENSP00000350719,ENSP00000353375,ENSP00000354681,ENSP00000358994,ENSP00000368464,ENSP00000379616,ENSP00000379709,ENSP00000382177,ENSP00000384164,ENSP00000398211,ENSP00000406012,ENSP00000421280,ENSP00000439182,ENSP00000458355…	ARHGAP21,CENPE,DLGAP5,DNAH11,DNAH12,DNAH2,DNAH5,DNAH7,FYCO1,IFT140,KIF16B,KIF24,KIF27,MAP4,MYH11,MYH2,MYH3,MYO10,MYO1E,MYO1H,MYO5A,MYO5C,MYO6,MYO9A,OPA1,SYNE2,TTC21A
GO:0006996	organelle organization	127	3131	8.04e-06	ENSP00000202556,ENSP00000247191,ENSP00000249344,ENSP00000251047,ENSP00000251472,ENSP00000255882,ENSP00000257287,ENSP00000261441,ENSP00000261517,ENSP00000262113,ENSP00000262519,ENSP00000262715,ENSP00000263710,ENSP00000264183,ENSP00000264433,ENSP00000264515,ENSP00000265104,ENSP00000265148,ENSP00000265459,ENSP00000267163,ENSP00000273853,ENSP00000274498,ENSP00000277225,ENSP00000278935,ENSP00000279392…	ABLIM2,AGTPBP1,AHI1,ARHGAP21,ARHGAP26,ARHGEF2,ARID4B,ASPM,ATRX,BAZ2B,BLM,BRCA1,BRD3,CBX6,CCDC88B,CCRN4L,CDK5RAP2,CENPC,CENPE,CENPT,CEP135,CEP164,CEP350,CHMP7,CKAP5,CLASP1,CNTROB,CORO6,COX16,CROCC,CTNNA1,CUL4B,DDX11,DISC1,DLGAP5,DMD,DNA2,DNAH5,DNAH7,DNLZ,EP400,EYA2,FAT1,FLNA,FMNL1,FMNL2,FNIP2,FRY,GAS2L3,HFM1,HIRIP3,IFT140,JMJD2C,KIAA0430,KIF24,KIF27,KIT,KMT2A,LETM1,LMAN1,LONP1,LRRC16A,LSM4,MAP2,MA…
GO:0006928	movement of cell or subcellular component	69	1355	1.42e-05	ENSP00000171887,ENSP00000225964,ENSP00000245503,ENSP00000247191,ENSP00000249344,ENSP00000257430,ENSP00000261839,ENSP00000263915,ENSP00000264431,ENSP00000264498,ENSP00000265104,ENSP00000265148,ENSP00000288135,ENSP00000288139,ENSP00000288235,ENSP00000291906,ENSP00000296137,ENSP00000297814,ENSP00000303540,ENSP00000311273,ENSP00000312554,ENSP00000320025,ENSP00000329219,ENSP00000331983,ENSP00000333292…	AMOTL1,APC,ARHGAP21,ASPM,CACNA1D,CACNA1I,CACNB2,CCL16,CENPE,CFAP44,COL1A1,DISC1,DLGAP5,DMD,DNAH11,DNAH12,DNAH2,DNAH5,DNAH7,FAT1,FEZF1,FGF2,FLNA,FMNL1,FN1,FYCO1,GPR124,GRB14,IFT140,JAK3,KIF16B,KIF24,KIF27,KIT,LRRC16A,MAP4,MYH11,MYH2,MYH3,MYO10,MYO1E,MYO1H,MYO5A,MYO5C,MYO6,MYO9A,NEDD4L,OPA1,PKN3,PREX1,PTPRA,RAPGEF2,RELN,SAA1,SAA2,SCN1A,SLIT2,SPATA13,SPNS2,SPTBN1,SPTBN2,STRIP2,SYNE2,TMF1,TNS1,TRPM2,…
GO:0000226	microtubule cytoskeleton organization	31	393	2.86e-05	ENSP00000257287,ENSP00000263710,ENSP00000265104,ENSP00000265148,ENSP00000311273,ENSP00000317144,ENSP00000326550,ENSP00000343818,ENSP00000349238,ENSP00000350719,ENSP00000353375,ENSP00000353508,ENSP00000354837,ENSP00000355593,ENSP00000356379,ENSP00000356579,ENSP00000358770,ENSP00000358866,ENSP00000362244,ENSP00000362441,ENSP00000364691,ENSP00000368464,ENSP00000369614,ENSP00000384792,ENSP00000385636…	ARHGEF2,ASPM,ATRX,BRCA1,CCDC88B,CDK5RAP2,CENPE,CEP135,CEP350,CKAP5,CLASP1,CNTROB,CROCC,DISC1,DNAH5,DNAH7,FLNA,GAS2L3,KIF24,MAP2,MAP4,MAP7D1,OBSL1,PHLDB2,PIBF1,RGPD4,SLK,SPIRE1,SYNE2,TACC3,WDR62
GO:0051128	regulation of cellular component organization	97	2306	0.0001	ENSP00000200453,ENSP00000202556,ENSP00000245907,ENSP00000247191,ENSP00000249344,ENSP00000251047,ENSP00000251507,ENSP00000256707,ENSP00000257287,ENSP00000257430,ENSP00000261517,ENSP00000262519,ENSP00000263073,ENSP00000263710,ENSP00000264431,ENSP00000264433,ENSP00000265140,ENSP00000265148,ENSP00000265963,ENSP00000267163,ENSP00000268638,ENSP00000268989,ENSP00000275815,ENSP00000276440,ENSP00000288135…	AHI1,ANKRD32,APC,ARHGEF2,ATAD3A,ATRX,BCL11A,BRCA1,C3,CAND1,CCT2,CDK5RAP2,CENPE,CEP135,CLASP1,CNTROB,COL16A1,CROCC,CUL4B,DDX11,DLGAP5,DMD,DOCK5,EPHA1,FAM178A,FHL1,FLNA,FMNL1,FMNL2,FN1,FNIP2,FYCO1,GRIN2B,GTF2H1,HSPG2,IFT140,IRF8,JMJD2C,KANK1,KIDINS220,KIT,KMT2A,LMAN1,LRRC16A,MACF1,MAP2,MAP3K4,MAP4,MYO10,NEDD4L,NLGN2,NPTN,OBSL1,OPA1,PHLDB2,PLCE1,PLEKHM1,PPP1R13B,PPP1R15A,PREX1,RABGAP1,RABGAP1L,RAPGE…
GO:0051130	positive regulation of cellular component organization	58	1128	0.00011	ENSP00000200453,ENSP00000202556,ENSP00000245907,ENSP00000247191,ENSP00000251047,ENSP00000256707,ENSP00000257287,ENSP00000257430,ENSP00000263710,ENSP00000264431,ENSP00000264433,ENSP00000265140,ENSP00000265963,ENSP00000267163,ENSP00000268638,ENSP00000275815,ENSP00000276440,ENSP00000288135,ENSP00000290401,ENSP00000294008,ENSP00000296137,ENSP00000299300,ENSP00000305288,ENSP00000309714,ENSP00000325677…	AHI1,ANKRD32,APC,ATRX,BCL11A,BRCA1,C3,CAND1,CCT2,CDK5RAP2,CEP135,CLASP1,COL16A1,CROCC,CUL4B,DDX11,DLGAP5,DMD,DOCK5,EPHA1,FAM178A,FLNA,FN1,FNIP2,FYCO1,GTF2H1,IRF8,KIDINS220,KIT,KMT2A,LMAN1,LRRC16A,MACF1,MAP3K4,NEDD4L,NLGN2,NPTN,OBSL1,OPA1,PHLDB2,PLEKHM1,PPP1R13B,PPP1R15A,PREX1,RAPGEF2,RB1,RELN,RGPD4,RNF40,SH3PXD2B,SLIT2,SLX4,SPIRE1,TENM3,TP53BP2,UNC13A,VCP,VLDLR
GO:0033043	regulation of organelle organization	58	1155	0.00021	ENSP00000202556,ENSP00000247191,ENSP00000251047,ENSP00000251507,ENSP00000257287,ENSP00000257430,ENSP00000261517,ENSP00000262519,ENSP00000263073,ENSP00000263710,ENSP00000265140,ENSP00000265148,ENSP00000267163,ENSP00000268989,ENSP00000275815,ENSP00000294008,ENSP00000296137,ENSP00000299300,ENSP00000309714,ENSP00000319104,ENSP00000323421,ENSP00000325677,ENSP00000326550,ENSP00000331983,ENSP00000341489…	ANKRD32,APC,ARHGEF2,ATRX,BRCA1,CCT2,CDK5RAP2,CENPE,CEP135,CLASP1,CNTROB,CROCC,DDX11,DLGAP5,EPHA1,FAM178A,FLNA,FYCO1,IFT140,JMJD2C,KANK1,KMT2A,LMAN1,LRRC16A,MAP2,MAP3K4,MAP4,OBSL1,OPA1,PHLDB2,PPP1R13B,PREX1,RABGAP1,RABGAP1L,RB1,RGPD4,RNF40,SETD1A,SGSM2,SH3PXD2B,SLIT2,SLX4,SMC1A,SMG1,SMG6,SPIRE1,SPTBN1,SPTBN2,SUPT6H,SYDE1,SYNE2,TACC3,TBC1D15,TBCD,TP53BP2,TRPM2,UHRF1,VPS13C
GO:0030029	actin filament-based process	33	493	0.00025	ENSP00000245503,ENSP00000255882,ENSP00000262113,ENSP00000274498,ENSP00000288135,ENSP00000288139,ENSP00000288235,ENSP00000288670,ENSP00000303540,ENSP00000304669,ENSP00000320025,ENSP00000329219,ENSP00000331983,ENSP00000344562,ENSP00000350719,ENSP00000354837,ENSP00000354923,ENSP00000358866,ENSP00000358994,ENSP00000361009,ENSP00000363557,ENSP00000379616,ENSP00000382177,ENSP00000383199,ENSP00000385636…	ABLIM2,ARHGAP26,ARHGEF2,CACNA1D,CACNB2,CORO6,CTNNA1,DMD,FAT1,FLNA,FMNL1,FMNL2,FRY,GAS2L3,KIT,LRRC16A,MICAL3,MYH11,MYH2,MYH3,MYO1E,MYO5A,MYO6,MYOM2,MYOM3,NEDD4L,OBSL1,PI4KA,PREX1,SCN1A,SPIRE1,SYNE2,XIRP2
GO:0044087	regulation of cellular component biogenesis	47	867	0.00033	ENSP00000257287,ENSP00000257430,ENSP00000263710,ENSP00000264431,ENSP00000264433,ENSP00000265140,ENSP00000265963,ENSP00000267163,ENSP00000268638,ENSP00000275815,ENSP00000288135,ENSP00000294008,ENSP00000305288,ENSP00000309714,ENSP00000323421,ENSP00000331983,ENSP00000338774,ENSP00000343818,ENSP00000347719,ENSP00000349259,ENSP00000350719,ENSP00000351777,ENSP00000353375,ENSP00000353508,ENSP00000354573…	ANKRD32,APC,ARHGEF2,BCL11A,BRCA1,CAND1,CDK5RAP2,CEP135,CLASP1,CNTROB,COL16A1,CROCC,CUL4B,EPHA1,FAM178A,FLNA,FNIP2,GTF2H1,HEATR1,IFT140,IRF8,KANK1,KIT,LRRC16A,MACF1,MAP2,MAP4,MYO10,NLGN2,PHLDB2,PLEKHM1,PREX1,RAPGEF2,RB1,SACS,SH3PXD2B,SLIT2,SLK,SLX4,SMC1A,SPIRE1,SPTBN1,SPTBN2,SYNE2,TBCD,TRPM2,VCP
GO:0009987	cellular process	404	14652	0.0015	ENSP00000007414,ENSP00000161863,ENSP00000171887,ENSP00000200453,ENSP00000202556,ENSP00000215862,ENSP00000219689,ENSP00000222145,ENSP00000223366,ENSP00000225964,ENSP00000228850,ENSP00000236877,ENSP00000237536,ENSP00000241051,ENSP00000245503,ENSP00000245907,ENSP00000247191,ENSP00000249344,ENSP00000251047,ENSP00000251472,ENSP00000251507,ENSP00000251527,ENSP00000252674,ENSP00000252804,ENSP00000254108…	AARS,ABCF1,ABLIM2,ACAN,ACAP2,ACHE,ADAMTS20,ADAMTS7,ADCY9,AGL,AGTPBP1,AHI1,AKAP3,AMOTL1,ANKRD32,APC,ARHGAP21,ARHGAP26,ARHGEF1,ARHGEF2,ARID4B,ASPM,ATP4A,ATRX,BAZ2B,BCL11A,BLM,BRCA1,BRD3,C17orf97,C3,CACNA1D,CACNA1E,CACNA1I,CACNB2,CAMTA1,CAND1,CANT1,CASP7,CBX6,CC2D1A,CCDC88B,CCL16,CCRN4L,CCT2,CDH23,CDK5RAP2,CENPC,CENPE,CENPT,CEP135,CEP164,CEP350,CFAP44,CHGB,CHMP7,CHTF18,CIC,CIITA,CKAP5,CKMT1A,CKMT1B,…
GO:0044085	cellular component biogenesis	97	2556	0.0047	ENSP00000171887,ENSP00000225964,ENSP00000251047,ENSP00000257287,ENSP00000257430,ENSP00000259335,ENSP00000259808,ENSP00000262113,ENSP00000263710,ENSP00000264431,ENSP00000264515,ENSP00000265104,ENSP00000265148,ENSP00000265459,ENSP00000265594,ENSP00000265963,ENSP00000273853,ENSP00000278935,ENSP00000280614,ENSP00000288135,ENSP00000290208,ENSP00000290401,ENSP00000294008,ENSP00000296859,ENSP00000297814…	ACHE,AHI1,APC,ASPM,ATRX,BLM,CAND1,CCRN4L,CCT2,CDK5RAP2,CENPC,CENPE,CENPT,CEP135,CEP164,CHMP7,CKAP5,CLASP1,CNTROB,COL16A1,COL1A1,COL6A1,COX16,CTNNA1,CUL4B,DDX31,DHX37,DISC1,DMD,DMXL1,DNA2,DNAH5,DNAH7,EID2,FLNA,FN1,GRIN2B,GTF2H1,HEATR1,HLA-DRB1,IFT140,IKBKE,KCNG3,KIAA0368,KIF24,KIF27,KIT,KMT2A,LETM1,LMAN1,LONP1,LRRC16A,LSM4,MAGI1,MCCC1,MDN1,MIA3,MIS18BP1,MRPL10,MYH11,MYH3,MYO9A,MYOM2,MYOM3,NLGN2,NP…
GO:0006816	calcium ion transport	19	242	0.0061	ENSP00000223366,ENSP00000236877,ENSP00000263269,ENSP00000264498,ENSP00000288139,ENSP00000305653,ENSP00000320025,ENSP00000335029,ENSP00000354006,ENSP00000354681,ENSP00000356545,ENSP00000370744,ENSP00000373734,ENSP00000379818,ENSP00000381023,ENSP00000381768,ENSP00000385019,ENSP00000435299,ENSP00000477455	CACNA1D,CACNA1E,CACNA1I,CACNB2,CDH23,CRACR2B,DENND5B,FGF2,GCK,GRIN2A,GRIN2B,GRIN2D,ITPR2,LETM1,OPA1,RASA3,SLC8A2,TRPM2,TRPM6
GO:0022607	cellular component assembly	90	2343	0.0061	ENSP00000171887,ENSP00000225964,ENSP00000251047,ENSP00000257287,ENSP00000257430,ENSP00000259335,ENSP00000259808,ENSP00000262113,ENSP00000263710,ENSP00000264431,ENSP00000264515,ENSP00000265104,ENSP00000265148,ENSP00000265459,ENSP00000265594,ENSP00000265963,ENSP00000273853,ENSP00000278935,ENSP00000280614,ENSP00000288135,ENSP00000290401,ENSP00000294008,ENSP00000296859,ENSP00000297814,ENSP00000299300…	ACHE,AHI1,APC,ASPM,ATRX,BLM,CAND1,CCRN4L,CCT2,CDK5RAP2,CENPC,CENPE,CENPT,CEP135,CEP164,CHMP7,CKAP5,CLASP1,CNTROB,COL16A1,COL1A1,COL6A1,COX16,CTNNA1,CUL4B,DISC1,DMD,DMXL1,DNA2,DNAH5,DNAH7,EID2,FLNA,FN1,GRIN2B,GTF2H1,HLA-DRB1,IFT140,IKBKE,KCNG3,KIAA0368,KIF24,KIF27,KIT,KMT2A,LETM1,LMAN1,LONP1,LRRC16A,LSM4,MAGI1,MCCC1,MDN1,MIA3,MIS18BP1,MYH11,MYH3,MYO9A,MYOM2,MYOM3,NLGN2,NPTN,NRXN2,OBSL1,OPA1,PIBF1,…
GO:0033044	regulation of chromosome organization	22	313	0.0061	ENSP00000247191,ENSP00000257430,ENSP00000262519,ENSP00000263073,ENSP00000265140,ENSP00000265148,ENSP00000267163,ENSP00000294008,ENSP00000299300,ENSP00000319104,ENSP00000325677,ENSP00000326550,ENSP00000343818,ENSP00000359292,ENSP00000362441,ENSP00000370710,ENSP00000375986,ENSP00000402515,ENSP00000418960,ENSP00000436786,ENSP00000440402,ENSP00000479617	ANKRD32,APC,ATRX,BRCA1,CCT2,CDK5RAP2,CENPE,DDX11,DLGAP5,FAM178A,JMJD2C,KMT2A,MAP3K4,RB1,RNF40,SETD1A,SLX4,SMG1,SMG6,SUPT6H,TACC3,UHRF1
GO:0051179	localization	171	5233	0.0061	ENSP00000007414,ENSP00000171887,ENSP00000200453,ENSP00000202556,ENSP00000223366,ENSP00000225964,ENSP00000228850,ENSP00000236877,ENSP00000245503,ENSP00000245907,ENSP00000247191,ENSP00000249044,ENSP00000249344,ENSP00000251047,ENSP00000251507,ENSP00000251527,ENSP00000257287,ENSP00000257430,ENSP00000258991,ENSP00000261517,ENSP00000262101,ENSP00000262483,ENSP00000262623,ENSP00000263073,ENSP00000263116…	ABCF1,ACAP2,ACHE,AGL,AHI1,AKAP3,AMOTL1,ANKRD32,AP1G2,APC,APOL5,ARHGAP21,ARHGEF2,ASPM,ATP4A,ATRX,C3,CACNA1D,CACNA1E,CACNA1I,CACNB2,CAND1,CANT1,CCDC88B,CCL16,CCT2,CDH23,CDK5RAP2,CENPC,CENPE,CENPT,CEP135,CEP164,CFAP44,CHMP7,CKAP5,CLASP1,COL1A1,CRACR2B,CROCC,CTNNA1,CYB5R1,DDX42,DENND5B,DISC1,DLGAP5,DMD,DNAH11,DNAH2,DNAH5,DNAH7,DNLZ,EPS15L1,ESYT2,EYA2,FAM178A,FAT1,FBN1,FEZF1,FGF2,FLNA,FMNL1,FN1,FYCO1,…
GO:0051641	cellular localization	85	2180	0.0061	ENSP00000200453,ENSP00000225964,ENSP00000247191,ENSP00000251047,ENSP00000251507,ENSP00000251527,ENSP00000257287,ENSP00000261517,ENSP00000263073,ENSP00000263269,ENSP00000263710,ENSP00000264431,ENSP00000264498,ENSP00000265140,ENSP00000265148,ENSP00000265459,ENSP00000267163,ENSP00000268989,ENSP00000273853,ENSP00000278935,ENSP00000288135,ENSP00000296137,ENSP00000296859,ENSP00000304669,ENSP00000305288…	ACAP2,AHI1,ANKRD32,AP1G2,ARHGAP21,ARHGEF2,ASPM,ATRX,CACNB2,CCDC88B,CDK5RAP2,CENPC,CENPE,CENPT,CEP135,CEP164,CHMP7,CKAP5,CLASP1,COL1A1,CRACR2B,CROCC,CTNNA1,DLGAP5,DMD,DNLZ,ESYT2,FAM178A,FGF2,FLNA,FYCO1,GPHN,GRIN2A,GRIN2B,GRIN2D,IFT140,ITPR2,KIF16B,KIF24,KIT,LETM1,LMAN1,MACF1,MAP4,MIA3,MTX1,MYO10,MYO5A,MYO6,NLGN2,NOS2,NRXN2,OBSL1,OPA1,PIBF1,PLEKHM1,POM121C,PPP1R15A,RABGAP1,RABGAP1L,RAPGEF2,RAPGEF6,…
GO:0086010	membrane depolarization during action potential	8	42	0.0061	ENSP00000283254,ENSP00000288139,ENSP00000303540,ENSP00000320025,ENSP00000346534,ENSP00000356545,ENSP00000385019,ENSP00000386306	CACNA1D,CACNA1E,CACNA1I,CACNB2,SCN1A,SCN3A,SCN8A,SCN9A
GO:0033045	regulation of sister chromatid segregation	10	75	0.0079	ENSP00000247191,ENSP00000257430,ENSP00000265140,ENSP00000265148,ENSP00000267163,ENSP00000326550,ENSP00000343818,ENSP00000359292,ENSP00000362441,ENSP00000440402	ANKRD32,APC,ATRX,CDK5RAP2,CENPE,DDX11,DLGAP5,FAM178A,RB1,TACC3
GO:0035556	intracellular signal transduction	64	1528	0.0079	ENSP00000200453,ENSP00000202556,ENSP00000241051,ENSP00000251472,ENSP00000255882,ENSP00000259808,ENSP00000263269,ENSP00000264431,ENSP00000264433,ENSP00000264498,ENSP00000267163,ENSP00000276440,ENSP00000288135,ENSP00000288368,ENSP00000291906,ENSP00000294016,ENSP00000294618,ENSP00000296859,ENSP00000298110,ENSP00000300651,ENSP00000304604,ENSP00000325527,ENSP00000327251,ENSP00000335029,ENSP00000337261…	ADCY9,AMOTL1,ARHGEF1,ARHGEF2,ATRX,BRCA1,CNOT10,DCDC1,DCDC2C,DEPDC7,DMD,DOCK5,DOCK6,FBN1,FGF2,FNIP2,GPR101,GRIN2A,GRIN2B,GRIN2D,IKBKE,ITPR2,JAK3,KIAA1804,KIT,KSR1,KSR2,MAGI3,MAP3K2,MAP3K4,MARK3,MAST1,MAST2,MED1,MOK,MYO6,MYO9A,NOS2,PI4KA,PKN3,PLCE1,PLEKHM1,PPP1R13B,PPP1R15A,PREX1,PREX2,PTPRA,RAPGEF2,RAPGEF5,RAPGEF6,RASA3,RB1,RIPK1,RPS6KA2,SDCBP2,SLK,SPTBN1,SPTBN2,TP53BP2,TRPM2,TSHR,UNC13A,VAV2,ZNF6…
GO:0043085	positive regulation of catalytic activity	59	1381	0.0079	ENSP00000200453,ENSP00000241051,ENSP00000251507,ENSP00000256707,ENSP00000259808,ENSP00000262315,ENSP00000264431,ENSP00000264498,ENSP00000265148,ENSP00000268989,ENSP00000274498,ENSP00000275815,ENSP00000288135,ENSP00000288368,ENSP00000294008,ENSP00000296859,ENSP00000299300,ENSP00000300648,ENSP00000309714,ENSP00000310933,ENSP00000317144,ENSP00000324287,ENSP00000325527,ENSP00000327251,ENSP00000335029…	ACAP2,ARHGAP21,ARHGAP26,ARHGEF1,CCL16,CCT2,CENPE,CHTF18,DDX11,DEPDC7,EPHA1,FBN1,FGF2,FN1,FZD8,GCN1L1,GIT1,GRIN2A,GRIN2B,HLA-DRB1,KIAA1804,KIDINS220,KIT,LLGL2,MADD,MAP3K2,MAP3K4,MTCH1,MYO9A,NLRP2,NOS2,PIBF1,PKP4,PLCE1,PPP1R15A,PREX1,PREX2,RABGAP1,RABGAP1L,RAPGEF2,RAPGEF6,RASA3,RELN,RGPD4,RGS22,RIPK1,SAA1,SGSM2,SH3PXD2B,SLK,SLX4,SYDE1,TBC1D15,TBCD,TSHR,UHRF1,VAV2,VCP,VLDLR
GO:0043087	regulation of GTPase activity	28	474	0.0079	ENSP00000222145,ENSP00000241051,ENSP00000251507,ENSP00000264431,ENSP00000268989,ENSP00000274498,ENSP00000275815,ENSP00000288368,ENSP00000296859,ENSP00000324287,ENSP00000335029,ENSP00000337261,ENSP00000341489,ENSP00000347719,ENSP00000348349,ENSP00000354109,ENSP00000360916,ENSP00000361009,ENSP00000362751,ENSP00000370196,ENSP00000374409,ENSP00000376333,ENSP00000378338,ENSP00000379709,ENSP00000386810…	ACAP2,ARHGAP21,ARHGAP26,ARHGEF1,CCL16,DEPDC7,EPHA1,GIT1,LLGL2,MYO9A,PKP4,PREX1,PREX2,RABGAP1,RABGAP1L,RAPGEF2,RAPGEF6,RASA3,RASIP1,RGPD4,RGS22,SBF1,SGSM2,SLIT2,SYDE1,TBC1D15,TBCD,VAV2
GO:0065009	regulation of molecular function	117	3322	0.0079	ENSP00000200453,ENSP00000222145,ENSP00000241051,ENSP00000245907,ENSP00000247226,ENSP00000251507,ENSP00000251691,ENSP00000252674,ENSP00000252804,ENSP00000256707,ENSP00000257430,ENSP00000259808,ENSP00000262315,ENSP00000263073,ENSP00000263269,ENSP00000264431,ENSP00000264433,ENSP00000264498,ENSP00000265148,ENSP00000265459,ENSP00000265963,ENSP00000267163,ENSP00000267396,ENSP00000268989,ENSP00000274498…	ACAP2,ANKRD36C,APC,ARHGAP21,ARHGAP26,ARHGEF1,ARHGEF2,ARHGEF40,BLM,C19orf26,C3,CACNA1D,CACNB2,CAND1,CCL16,CCT2,CENPE,CHGB,CHTF18,COL6A3,DDX11,DENND4B,DENND5B,DEPDC7,DISC1,DMD,DOCK5,DOCK6,EPHA1,FBN1,FGF2,FHL1,FLNA,FN1,FNIP2,FRY,FZD8,GCN1L1,GIT1,GRIN2A,GRIN2B,GRIN2D,GTF2H1,HLA-DRB1,HNRNPR,IKBKE,ITIH3,JAK3,KIAA0430,KIAA1244,KIAA1804,KIDINS220,KIT,KMT2A,KSR1,LLGL2,MADD,MAP2,MAP3K2,MAP3K4,MARK3,MED1,ML…
GO:0070588	calcium ion transmembrane transport	16	189	0.0079	ENSP00000236877,ENSP00000263269,ENSP00000264498,ENSP00000288139,ENSP00000305653,ENSP00000320025,ENSP00000335029,ENSP00000354006,ENSP00000354681,ENSP00000356545,ENSP00000370744,ENSP00000373734,ENSP00000379818,ENSP00000381023,ENSP00000385019,ENSP00000477455	CACNA1D,CACNA1E,CACNA1I,CACNB2,DENND5B,FGF2,GRIN2A,GRIN2B,GRIN2D,ITPR2,LETM1,OPA1,RASA3,SLC8A2,TRPM2,TRPM6
GO:0033047	regulation of mitotic sister chromatid segregation	9	63	0.0091	ENSP00000247191,ENSP00000257430,ENSP00000265140,ENSP00000265148,ENSP00000267163,ENSP00000326550,ENSP00000343818,ENSP00000359292,ENSP00000362441	ANKRD32,APC,ATRX,CDK5RAP2,CENPE,DLGAP5,FAM178A,RB1,TACC3
GO:1903047	mitotic cell cycle process	31	564	0.0091	ENSP00000247191,ENSP00000257287,ENSP00000257430,ENSP00000263710,ENSP00000265148,ENSP00000267163,ENSP00000273853,ENSP00000278935,ENSP00000286398,ENSP00000310842,ENSP00000317144,ENSP00000318641,ENSP00000323421,ENSP00000326550,ENSP00000343818,ENSP00000347232,ENSP00000349259,ENSP00000349961,ENSP00000351185,ENSP00000353375,ENSP00000354837,ENSP00000358866,ENSP00000369614,ENSP00000380794,ENSP00000384109…	APC,ARHGEF2,BLM,BRCA1,CDK5RAP2,CENPC,CENPE,CEP135,CEP164,CHMP7,CKAP5,CLASP1,CNOT10,CNTROB,CUL4B,DLGAP5,DNA2,FANCI,FLNA,GIGYF2,INTS3,MAP4,PIBF1,RB1,RGPD4,SMC1A,SMC2,SMC4,SPTBN1,TACC3,WDR62
GO:0051056	regulation of small GTPase mediated signal transduction	21	310	0.0093	ENSP00000241051,ENSP00000247226,ENSP00000251691,ENSP00000274498,ENSP00000288368,ENSP00000298694,ENSP00000310933,ENSP00000335029,ENSP00000337261,ENSP00000341489,ENSP00000348349,ENSP00000354597,ENSP00000354837,ENSP00000360431,ENSP00000360916,ENSP00000361009,ENSP00000379709,ENSP00000392423,ENSP00000398560,ENSP00000422591,ENSP00000477725	ARHGAP21,ARHGAP26,ARHGEF1,ARHGEF2,ARHGEF40,DENND4B,DEPDC7,KANK1,KIAA1244,MADD,MYO9A,PLCE1,PLEKHG3,PREX1,PREX2,RASA3,RELN,SLIT2,SPATA13,SYDE1,VAV2
GO:0051899	membrane depolarization	9	64	0.0095	ENSP00000283254,ENSP00000288139,ENSP00000303540,ENSP00000320025,ENSP00000346534,ENSP00000356545,ENSP00000385019,ENSP00000386306,ENSP00000436786	CACNA1D,CACNA1E,CACNA1I,CACNB2,KMT2A,SCN1A,SCN3A,SCN8A,SCN9A
GO:0000278	mitotic cell cycle	33	628	0.0101	ENSP00000247191,ENSP00000257287,ENSP00000257430,ENSP00000263710,ENSP00000265148,ENSP00000267163,ENSP00000273853,ENSP00000278935,ENSP00000286398,ENSP00000310842,ENSP00000317144,ENSP00000318641,ENSP00000323421,ENSP00000326550,ENSP00000343818,ENSP00000347232,ENSP00000347719,ENSP00000349259,ENSP00000349961,ENSP00000351185,ENSP00000353375,ENSP00000354837,ENSP00000358866,ENSP00000369614,ENSP00000380794…	APC,ARHGEF2,BLM,BRCA1,CDK5RAP2,CENPC,CENPE,CENPT,CEP135,CEP164,CHMP7,CKAP5,CLASP1,CNOT10,CNTROB,CUL4B,DLGAP5,DNA2,FANCI,FLNA,GIGYF2,INTS3,MAP4,PIBF1,RB1,RGPD4,SMC1A,SMC2,SMC4,SPTBN1,TACC3,TBCD,WDR62
GO:0010720	positive regulation of cell development	28	491	0.0101	ENSP00000256707,ENSP00000263816,ENSP00000264431,ENSP00000276440,ENSP00000288135,ENSP00000290401,ENSP00000316527,ENSP00000331983,ENSP00000338774,ENSP00000346839,ENSP00000354573,ENSP00000354681,ENSP00000354837,ENSP00000354923,ENSP00000355593,ENSP00000356379,ENSP00000358866,ENSP00000361009,ENSP00000370710,ENSP00000371532,ENSP00000383199,ENSP00000385636,ENSP00000392423,ENSP00000411145,ENSP00000422591…	ARHGEF2,ASPM,BCL11A,DISC1,DMD,DOCK5,FEZF1,FLNA,FN1,JMJD2C,KIDINS220,KIT,LRP2,LRRC16A,MACF1,NEDD4L,NPTN,OBSL1,OPA1,PREX1,RAPGEF2,RELN,SLIT2,SRRT,TENM3,UNC13A,VLDLR,ZNF609
GO:0050789	regulation of biological process	317	11116	0.0101	ENSP00000007414,ENSP00000161863,ENSP00000200453,ENSP00000202556,ENSP00000222145,ENSP00000223366,ENSP00000225964,ENSP00000228850,ENSP00000236877,ENSP00000237536,ENSP00000241051,ENSP00000245503,ENSP00000245907,ENSP00000247191,ENSP00000247226,ENSP00000249344,ENSP00000251047,ENSP00000251472,ENSP00000251507,ENSP00000251691,ENSP00000252674,ENSP00000252804,ENSP00000254108,ENSP00000255882,ENSP00000256707…	AARS,ABCF1,ACHE,ADAMTS20,ADAMTS7,ADCY9,AFF1,AHI1,AKAP3,AMOTL1,ANKRD26,ANKRD32,APC,ARHGAP21,ARHGAP26,ARHGEF1,ARHGEF2,ARHGEF40,ARID4B,ASPM,ATAD3A,ATRX,BAZ2B,BCL11A,BICC1,BLM,BRCA1,BRD3,C19orf26,C3,CACNA1D,CACNA1E,CACNA1I,CACNB2,CAMTA1,CAND1,CBX6,CC2D1A,CCDC88B,CCL16,CCRN4L,CCT2,CDK5RAP2,CENPE,CENPT,CEP135,CEP164,CHGB,CHTF18,CIC,CIITA,CKAP5,CLASP1,CNOT10,CNTROB,COL16A1,COL1A1,COL6A3,CRACR2B,CROCC,CT…
GO:2001224	positive regulation of neuron migration	5	14	0.0101	ENSP00000264431,ENSP00000316527,ENSP00000354837,ENSP00000358866,ENSP00000392423	ARHGEF2,FLNA,RAPGEF2,RELN,ZNF609
GO:0007049	cell cycle	54	1263	0.012	ENSP00000161863,ENSP00000200453,ENSP00000247191,ENSP00000251507,ENSP00000257287,ENSP00000257430,ENSP00000262315,ENSP00000263710,ENSP00000265148,ENSP00000267163,ENSP00000273853,ENSP00000278935,ENSP00000286398,ENSP00000294008,ENSP00000309790,ENSP00000310842,ENSP00000317144,ENSP00000318641,ENSP00000323421,ENSP00000326550,ENSP00000341957,ENSP00000343818,ENSP00000347232,ENSP00000347719,ENSP00000349259…	APC,ARHGEF2,ASPM,ATRX,BLM,BRCA1,CDK5RAP2,CENPC,CENPE,CENPT,CEP135,CEP164,CHMP7,CHTF18,CKAP5,CLASP1,CNOT10,CNTROB,CROCC,CUL4B,DCDC1,DDX11,DLGAP5,DNA2,FANCI,FLNA,GIGYF2,HFM1,INTS3,KIAA0430,LLGL2,MAP4,MICAL3,MIS18BP1,PIBF1,PPP1R15A,RABGAP1,RABGAP1L,RB1,RGPD4,SLX4,SMC1A,SMC2,SMC4,SPIRE1,SPTBN1,TACC3,TBCD,TOP3A,TP53BP2,UHRF1,WDR62,YTHDC2,ZNF318
GO:0050794	regulation of cellular process	301	10484	0.012	ENSP00000007414,ENSP00000161863,ENSP00000200453,ENSP00000202556,ENSP00000222145,ENSP00000223366,ENSP00000225964,ENSP00000228850,ENSP00000236877,ENSP00000237536,ENSP00000241051,ENSP00000245503,ENSP00000245907,ENSP00000247191,ENSP00000247226,ENSP00000249344,ENSP00000251047,ENSP00000251472,ENSP00000251507,ENSP00000251691,ENSP00000252674,ENSP00000252804,ENSP00000254108,ENSP00000255882,ENSP00000256707…	AARS,ABCF1,ACHE,ADAMTS20,ADAMTS7,ADCY9,AFF1,AHI1,AKAP3,AMOTL1,ANKRD26,ANKRD32,APC,ARHGAP21,ARHGAP26,ARHGEF1,ARHGEF2,ARHGEF40,ARID4B,ASPM,ATAD3A,ATRX,BAZ2B,BCL11A,BICC1,BLM,BRCA1,BRD3,C19orf26,C3,CACNA1D,CACNA1E,CACNA1I,CAMTA1,CAND1,CBX6,CC2D1A,CCDC88B,CCL16,CCRN4L,CCT2,CDK5RAP2,CENPE,CENPT,CEP135,CEP164,CHGB,CHTF18,CIC,CIITA,CKAP5,CLASP1,CNOT10,CNTROB,COL16A1,COL1A1,COL6A3,CROCC,CTNNA1,CUL4B,DCDC…
GO:0051494	negative regulation of cytoskeleton organization	12	121	0.012	ENSP00000257430,ENSP00000263710,ENSP00000343818,ENSP00000347719,ENSP00000349259,ENSP00000353508,ENSP00000354837,ENSP00000405405,ENSP00000418960,ENSP00000422591,ENSP00000432568,ENSP00000477725	APC,ARHGEF2,BRCA1,CDK5RAP2,CLASP1,KANK1,MAP2,PHLDB2,SLIT2,SPTBN1,SPTBN2,TBCD
GO:0070925	organelle assembly	34	666	0.012	ENSP00000257287,ENSP00000262113,ENSP00000263710,ENSP00000265104,ENSP00000265148,ENSP00000265459,ENSP00000273853,ENSP00000278935,ENSP00000280614,ENSP00000297814,ENSP00000305288,ENSP00000309714,ENSP00000311273,ENSP00000317144,ENSP00000343818,ENSP00000354923,ENSP00000355593,ENSP00000356379,ENSP00000356774,ENSP00000358400,ENSP00000358866,ENSP00000363557,ENSP00000368464,ENSP00000369614,ENSP00000379616…	AHI1,ASPM,CCRN4L,CDK5RAP2,CENPC,CENPE,CENPT,CEP135,CEP164,CHMP7,CKAP5,CLASP1,CNTROB,DISC1,DMD,DNAH5,DNAH7,FLNA,IFT140,KIF24,KIF27,LSM4,MDN1,MYH11,MYH3,MYOM2,MYOM3,NLGN2,NRXN2,OBSL1,PIBF1,SH3PXD2B,TMF1,WDR62
GO:0050769	positive regulation of neurogenesis	25	425	0.0124	ENSP00000256707,ENSP00000263816,ENSP00000264431,ENSP00000288135,ENSP00000290401,ENSP00000316527,ENSP00000338774,ENSP00000346839,ENSP00000354573,ENSP00000354681,ENSP00000354837,ENSP00000354923,ENSP00000355593,ENSP00000356379,ENSP00000358866,ENSP00000370710,ENSP00000371532,ENSP00000383199,ENSP00000385636,ENSP00000392423,ENSP00000411145,ENSP00000422591,ENSP00000424226,ENSP00000429562,ENSP00000480421	ARHGEF2,ASPM,BCL11A,DISC1,DMD,FEZF1,FLNA,FN1,JMJD2C,KIDINS220,KIT,LRP2,MACF1,NEDD4L,NPTN,OBSL1,OPA1,RAPGEF2,RELN,SLIT2,SRRT,TENM3,UNC13A,VLDLR,ZNF609
GO:0030048	actin filament-based movement	11	105	0.0132	ENSP00000245503,ENSP00000288139,ENSP00000288235,ENSP00000303540,ENSP00000320025,ENSP00000350719,ENSP00000354923,ENSP00000358994,ENSP00000382177,ENSP00000383199,ENSP00000464317	CACNA1D,CACNB2,DMD,MYH2,MYH3,MYO1E,MYO5A,MYO6,NEDD4L,SCN1A,SYNE2
GO:0045597	positive regulation of cell differentiation	42	908	0.0135	ENSP00000225964,ENSP00000256707,ENSP00000259808,ENSP00000262101,ENSP00000263816,ENSP00000264431,ENSP00000264498,ENSP00000267163,ENSP00000276440,ENSP00000280614,ENSP00000288135,ENSP00000290401,ENSP00000300651,ENSP00000304669,ENSP00000309714,ENSP00000316527,ENSP00000331983,ENSP00000338774,ENSP00000346839,ENSP00000353099,ENSP00000354206,ENSP00000354573,ENSP00000354681,ENSP00000354837,ENSP00000354923…	ADAMTS20,AHI1,ARHGEF2,ASPM,BCL11A,CCRN4L,COL1A1,CTNNA1,DISC1,DMD,DOCK5,FEZF1,FGF2,FLNA,FN1,HLA-DRB1,JMJD2C,KIDINS220,KIT,LRP2,LRRC16A,MACF1,MED1,MSR1,NEDD4L,NPTN,OBSL1,OPA1,PREX1,RAPGEF2,RB1,RELN,RIPK1,SH3PXD2B,SLIT2,SOX6,SRRT,TENM3,UNC13A,VLDLR,ZNF219,ZNF609
GO:0010810	regulation of cell-substrate adhesion	15	189	0.0147	ENSP00000225964,ENSP00000263710,ENSP00000275815,ENSP00000276440,ENSP00000278353,ENSP00000331983,ENSP00000346839,ENSP00000347719,ENSP00000354573,ENSP00000358770,ENSP00000358866,ENSP00000361009,ENSP00000362776,ENSP00000405405,ENSP00000477725	CLASP1,COL16A1,COL1A1,DOCK5,EPHA1,FLNA,FN1,HSD17B12,KANK1,LRRC16A,MACF1,PHLDB2,PREX1,SLK,TBCD
GO:0043547	positive regulation of GTPase activity	24	406	0.0147	ENSP00000241051,ENSP00000251507,ENSP00000264431,ENSP00000268989,ENSP00000274498,ENSP00000275815,ENSP00000288368,ENSP00000296859,ENSP00000324287,ENSP00000335029,ENSP00000337261,ENSP00000341489,ENSP00000347719,ENSP00000348349,ENSP00000354109,ENSP00000361009,ENSP00000362751,ENSP00000374409,ENSP00000376333,ENSP00000378338,ENSP00000379709,ENSP00000386810,ENSP00000448182,ENSP00000478024	ACAP2,ARHGAP21,ARHGAP26,ARHGEF1,CCL16,DEPDC7,EPHA1,GIT1,LLGL2,MYO9A,PKP4,PREX1,PREX2,RABGAP1,RABGAP1L,RAPGEF2,RAPGEF6,RASA3,RGPD4,RGS22,SGSM2,SYDE1,TBC1D15,TBCD
GO:0051383	kinetochore organization	5	17	0.0155	ENSP00000265148,ENSP00000273853,ENSP00000286398,ENSP00000349961,ENSP00000457810	CENPC,CENPE,CENPT,SMC2,SMC4
GO:0022402	cell cycle process	41	890	0.0158	ENSP00000161863,ENSP00000200453,ENSP00000247191,ENSP00000257287,ENSP00000257430,ENSP00000263710,ENSP00000265148,ENSP00000267163,ENSP00000273853,ENSP00000278935,ENSP00000286398,ENSP00000294008,ENSP00000310842,ENSP00000317144,ENSP00000318641,ENSP00000323421,ENSP00000326550,ENSP00000343818,ENSP00000347232,ENSP00000349259,ENSP00000349961,ENSP00000351185,ENSP00000353375,ENSP00000354837,ENSP00000356379…	APC,ARHGEF2,ASPM,ATRX,BLM,BRCA1,CDK5RAP2,CENPC,CENPE,CEP135,CEP164,CHMP7,CKAP5,CLASP1,CNOT10,CNTROB,CROCC,CUL4B,DDX11,DLGAP5,DNA2,FANCI,FLNA,GIGYF2,HFM1,INTS3,KIAA0430,MAP4,PIBF1,PPP1R15A,RB1,RGPD4,SLX4,SMC1A,SMC2,SMC4,SPIRE1,SPTBN1,TACC3,WDR62,YTHDC2
GO:0051345	positive regulation of hydrolase activity	36	742	0.0158	ENSP00000200453,ENSP00000241051,ENSP00000251507,ENSP00000259808,ENSP00000264431,ENSP00000264498,ENSP00000268989,ENSP00000274498,ENSP00000275815,ENSP00000288135,ENSP00000288368,ENSP00000296859,ENSP00000324287,ENSP00000335029,ENSP00000337261,ENSP00000341489,ENSP00000346839,ENSP00000347719,ENSP00000348349,ENSP00000351777,ENSP00000354109,ENSP00000361009,ENSP00000362730,ENSP00000362751,ENSP00000374409…	ACAP2,ARHGAP21,ARHGAP26,ARHGEF1,CCL16,DDX11,DEPDC7,EPHA1,FGF2,FN1,GIT1,GRIN2A,GRIN2B,KIT,LLGL2,MTCH1,MYO9A,NLRP2,PKP4,PPP1R15A,PREX1,PREX2,RABGAP1,RABGAP1L,RAPGEF2,RAPGEF6,RASA3,RGPD4,RGS22,RIPK1,SGSM2,SYDE1,TBC1D15,TBCD,UHRF1,VCP
GO:0120035	regulation of plasma membrane bounded cell projection organization	31	600	0.0158	ENSP00000256707,ENSP00000257287,ENSP00000257430,ENSP00000264431,ENSP00000288135,ENSP00000290401,ENSP00000331983,ENSP00000338774,ENSP00000346839,ENSP00000350719,ENSP00000353375,ENSP00000353508,ENSP00000354573,ENSP00000354681,ENSP00000354923,ENSP00000361009,ENSP00000364691,ENSP00000369614,ENSP00000371532,ENSP00000381023,ENSP00000383199,ENSP00000385636,ENSP00000389913,ENSP00000392423,ENSP00000406012…	APC,BCL11A,CEP135,CNTROB,CROCC,DMD,FN1,GRIN2B,IFT140,KANK1,KIDINS220,KIT,LRRC16A,MACF1,MAP2,MAP4,MYO10,NEDD4L,NPTN,OBSL1,OPA1,PLEKHM1,PREX1,RAPGEF2,RELN,SLIT2,SYNE2,TENM3,TRPM2,UNC13A,VLDLR
GO:0006468	protein phosphorylation	42	923	0.0163	ENSP00000251472,ENSP00000259808,ENSP00000263269,ENSP00000264431,ENSP00000264433,ENSP00000264498,ENSP00000265963,ENSP00000270176,ENSP00000275815,ENSP00000288135,ENSP00000291906,ENSP00000300651,ENSP00000311684,ENSP00000317144,ENSP00000335029,ENSP00000343248,ENSP00000346644,ENSP00000349259,ENSP00000354006,ENSP00000354522,ENSP00000354671,ENSP00000355304,ENSP00000355583,ENSP00000356530,ENSP00000358770…	EPHA1,EPHA10,FGF2,FNIP2,GRIN2A,GRIN2B,GRIN2D,GTF2H1,IKBKE,JAK3,KIAA1804,KIT,KSR1,KSR2,MAP3K2,MAP3K4,MARK3,MAST1,MAST2,MED1,MOK,PIBF1,PKN3,PTPRA,RAPGEF2,RASA3,RELN,RIPK1,RNASEL,RPS6KA2,RPS6KL1,SBK1,SCYL1,SLK,SMG1,SPEG,SPTBN1,SPTBN2,TOP1,TRPM6,ULK3,VRK2
GO:0097553	calcium ion transmembrane import into cytosol	8	58	0.0166	ENSP00000263269,ENSP00000264498,ENSP00000305653,ENSP00000335029,ENSP00000370744,ENSP00000379818,ENSP00000381023,ENSP00000477455	FGF2,GRIN2A,GRIN2B,GRIN2D,ITPR2,LETM1,RASA3,TRPM2
GO:0065007	biological regulation	329	11740	0.0178	ENSP00000007414,ENSP00000161863,ENSP00000200453,ENSP00000202556,ENSP00000222145,ENSP00000223366,ENSP00000225964,ENSP00000228850,ENSP00000236877,ENSP00000237536,ENSP00000241051,ENSP00000245503,ENSP00000245907,ENSP00000247191,ENSP00000247226,ENSP00000249344,ENSP00000251047,ENSP00000251472,ENSP00000251507,ENSP00000251691,ENSP00000252674,ENSP00000252804,ENSP00000254108,ENSP00000255882,ENSP00000256707…	AARS,ABCF1,ACAP2,ACHE,ADAMTS20,ADAMTS7,ADCY9,AFF1,AHI1,AKAP3,AMOTL1,ANKRD26,ANKRD32,ANKRD36C,APC,ARHGAP21,ARHGAP26,ARHGEF1,ARHGEF2,ARHGEF40,ARID4B,ASPM,ATAD3A,ATRX,BAZ2B,BCL11A,BICC1,BLM,BRCA1,BRD3,C19orf26,C3,CACNA1D,CACNA1E,CACNA1I,CACNB2,CAMTA1,CAND1,CBX6,CC2D1A,CCDC88B,CCL16,CCRN4L,CCT2,CDH23,CDK5RAP2,CENPE,CENPT,CEP135,CEP164,CHGB,CHTF18,CIC,CIITA,CKAP5,CLASP1,CNOT10,CNTROB,COL16A1,COL1A1,CO…
GO:0031346	positive regulation of cell projection organization	21	343	0.019	ENSP00000256707,ENSP00000257287,ENSP00000257430,ENSP00000264431,ENSP00000288135,ENSP00000290401,ENSP00000331983,ENSP00000338774,ENSP00000346839,ENSP00000354573,ENSP00000354681,ENSP00000354923,ENSP00000364691,ENSP00000371532,ENSP00000383199,ENSP00000385636,ENSP00000389913,ENSP00000392423,ENSP00000422591,ENSP00000424226,ENSP00000429562	APC,BCL11A,CEP135,CROCC,DMD,FN1,KIDINS220,KIT,LRRC16A,MACF1,NEDD4L,NPTN,OBSL1,OPA1,PLEKHM1,RAPGEF2,RELN,SLIT2,TENM3,UNC13A,VLDLR
GO:0060401	cytosolic calcium ion transport	9	77	0.019	ENSP00000263269,ENSP00000264498,ENSP00000305653,ENSP00000335029,ENSP00000354681,ENSP00000370744,ENSP00000379818,ENSP00000381023,ENSP00000477455	FGF2,GRIN2A,GRIN2B,GRIN2D,ITPR2,LETM1,OPA1,RASA3,TRPM2
GO:1902904	negative regulation of supramolecular fiber organization	11	115	0.0197	ENSP00000257430,ENSP00000263710,ENSP00000347719,ENSP00000349259,ENSP00000353508,ENSP00000354837,ENSP00000363827,ENSP00000405405,ENSP00000422591,ENSP00000432568,ENSP00000477725	APC,ARHGEF2,CLASP1,HSPG2,KANK1,MAP2,PHLDB2,SLIT2,SPTBN1,SPTBN2,TBCD
GO:0048522	positive regulation of cellular process	156	4898	0.0211	ENSP00000007414,ENSP00000161863,ENSP00000200453,ENSP00000202556,ENSP00000223366,ENSP00000225964,ENSP00000236877,ENSP00000245907,ENSP00000247191,ENSP00000251047,ENSP00000254108,ENSP00000256707,ENSP00000257287,ENSP00000257430,ENSP00000259808,ENSP00000262101,ENSP00000262315,ENSP00000263710,ENSP00000263816,ENSP00000263915,ENSP00000264183,ENSP00000264431,ENSP00000264433,ENSP00000264498,ENSP00000265140…	ABCF1,ACHE,ADAMTS20,AHI1,AMOTL1,ANKRD32,APC,ARHGEF1,ARHGEF2,ARID4B,ASPM,ATRX,BCL11A,BLM,BRCA1,C3,CACNA1I,CAMTA1,CAND1,CCDC88B,CCL16,CCRN4L,CCT2,CDK5RAP2,CENPE,CEP135,CHTF18,CIITA,CLASP1,CNOT10,COL16A1,COL1A1,CROCC,CTNNA1,CUL4B,DDX11,DISC1,DLGAP5,DMD,DNA2,DOCK5,EPHA1,EYA2,FAM178A,FANCI,FBN1,FEZF1,FGF2,FLNA,FN1,FNIP2,FUS,FXR1,FYCO1,FZD8,GCK,GCN1L1,GIGYF2,GPR124,GRB14,GRIN2A,GRIN2B,GTF2H1,HEATR1,HLA…
GO:0050790	regulation of catalytic activity	82	2249	0.022	ENSP00000200453,ENSP00000222145,ENSP00000241051,ENSP00000245907,ENSP00000251507,ENSP00000251691,ENSP00000252674,ENSP00000256707,ENSP00000257430,ENSP00000259808,ENSP00000262315,ENSP00000263073,ENSP00000264431,ENSP00000264433,ENSP00000264498,ENSP00000265148,ENSP00000265963,ENSP00000267163,ENSP00000268989,ENSP00000274498,ENSP00000275815,ENSP00000288135,ENSP00000288368,ENSP00000294008,ENSP00000295550…	ACAP2,APC,ARHGAP21,ARHGAP26,ARHGEF1,BLM,C3,CAND1,CCL16,CCT2,CENPE,CHTF18,COL6A3,DDX11,DEPDC7,EPHA1,FBN1,FGF2,FN1,FNIP2,FRY,FZD8,GCN1L1,GIT1,GRIN2A,GRIN2B,GTF2H1,HLA-DRB1,HNRNPR,IKBKE,ITIH3,KIAA0430,KIAA1244,KIAA1804,KIDINS220,KIT,KSR1,LLGL2,MADD,MAP2,MAP3K2,MAP3K4,MLLT1,MTCH1,MYO9A,NLRP2,NOS2,PIBF1,PKP4,PLCE1,PPP1R15A,PREX1,PREX2,RABGAP1,RABGAP1L,RAPGEF2,RAPGEF6,RASA3,RASIP1,RB1,RELN,RGPD4,RGS22,…
GO:0044093	positive regulation of molecular function	66	1713	0.0223	ENSP00000200453,ENSP00000241051,ENSP00000251507,ENSP00000256707,ENSP00000259808,ENSP00000262315,ENSP00000264431,ENSP00000264498,ENSP00000265148,ENSP00000267163,ENSP00000268989,ENSP00000274498,ENSP00000275815,ENSP00000288135,ENSP00000288368,ENSP00000294008,ENSP00000296859,ENSP00000299300,ENSP00000300648,ENSP00000300651,ENSP00000309714,ENSP00000310933,ENSP00000317144,ENSP00000320025,ENSP00000324287…	ACAP2,ARHGAP21,ARHGAP26,ARHGEF1,ARHGEF2,CACNB2,CCL16,CCT2,CENPE,CHTF18,DDX11,DEPDC7,DMD,EPHA1,FBN1,FGF2,FN1,FZD8,GCN1L1,GIT1,GRIN2A,GRIN2B,HLA-DRB1,KIAA1804,KIDINS220,KIT,KMT2A,LLGL2,MADD,MAP3K2,MAP3K4,MARK3,MED1,MTCH1,MYO9A,NLRP2,NOS2,PIBF1,PKP4,PLCE1,PPP1R15A,PREX1,PREX2,RABGAP1,RABGAP1L,RAPGEF2,RAPGEF6,RASA3,RB1,RELN,RGPD4,RGS22,RIPK1,SAA1,SGSM2,SH3PXD2B,SLK,SLX4,SYDE1,TBC1D15,TBCD,TSHR,UHRF1,…
GO:0071417	cellular response to organonitrogen compound	26	485	0.0232	ENSP00000223366,ENSP00000225964,ENSP00000237536,ENSP00000257430,ENSP00000264431,ENSP00000282096,ENSP00000294016,ENSP00000304669,ENSP00000317971,ENSP00000325527,ENSP00000347232,ENSP00000354681,ENSP00000354837,ENSP00000355180,ENSP00000358327,ENSP00000362776,ENSP00000369756,ENSP00000370744,ENSP00000381023,ENSP00000382177,ENSP00000391676,ENSP00000402608,ENSP00000418960,ENSP00000422591,ENSP00000440402…	ADCY9,APC,ARHGEF2,BLM,BRCA1,CASP7,COL16A1,COL1A1,COL6A1,CPS1,CTNNA1,DDX11,FBN1,GCK,ITPR2,JAK3,MYO5A,OPA1,PDE3B,PTPRA,RAPGEF2,SLIT2,SOGA1,TRPM2,TSHR,WDTC1
GO:1901699	cellular response to nitrogen compound	29	568	0.0232	ENSP00000223366,ENSP00000225964,ENSP00000237536,ENSP00000257177,ENSP00000257430,ENSP00000264431,ENSP00000282096,ENSP00000294016,ENSP00000304669,ENSP00000317971,ENSP00000325527,ENSP00000347232,ENSP00000354681,ENSP00000354837,ENSP00000355180,ENSP00000358327,ENSP00000362441,ENSP00000362776,ENSP00000369756,ENSP00000370744,ENSP00000381023,ENSP00000382177,ENSP00000391676,ENSP00000402608,ENSP00000418960…	ADCY9,APC,ARHGEF2,ATRX,BLM,BRCA1,CASP7,COL16A1,COL1A1,COL6A1,CPS1,CTNNA1,DDX11,FBN1,GCK,ITPR2,JAK3,MYO5A,OPA1,PDE3B,PTPRA,RAPGEF2,SLIT2,SOGA1,SRRT,TRPM2,TSHR,WDTC1,ZCCHC11
GO:0007059	chromosome segregation	17	253	0.0235	ENSP00000247191,ENSP00000265148,ENSP00000267163,ENSP00000273853,ENSP00000286398,ENSP00000294008,ENSP00000317144,ENSP00000323421,ENSP00000343818,ENSP00000349961,ENSP00000354522,ENSP00000359454,ENSP00000380794,ENSP00000381773,ENSP00000418960,ENSP00000440402,ENSP00000457810	BRCA1,CDK5RAP2,CENPC,CENPE,CENPT,CHMP7,DDX11,DLGAP5,HFM1,PIBF1,RB1,SLX4,SMC1A,SMC2,SMC4,TOP1,TOP3B
GO:0007063	regulation of sister chromatid cohesion	5	21	0.0244	ENSP00000265140,ENSP00000267163,ENSP00000359292,ENSP00000362441,ENSP00000440402	ANKRD32,ATRX,DDX11,FAM178A,RB1
GO:0051962	positive regulation of nervous system development	26	488	0.0244	ENSP00000256707,ENSP00000263816,ENSP00000264431,ENSP00000288135,ENSP00000290401,ENSP00000305288,ENSP00000316527,ENSP00000338774,ENSP00000346839,ENSP00000354573,ENSP00000354681,ENSP00000354837,ENSP00000354923,ENSP00000355593,ENSP00000356379,ENSP00000358866,ENSP00000370710,ENSP00000371532,ENSP00000383199,ENSP00000385636,ENSP00000392423,ENSP00000411145,ENSP00000422591,ENSP00000424226,ENSP00000429562…	ARHGEF2,ASPM,BCL11A,DISC1,DMD,FEZF1,FLNA,FN1,JMJD2C,KIDINS220,KIT,LRP2,MACF1,NEDD4L,NLGN2,NPTN,OBSL1,OPA1,RAPGEF2,RELN,SLIT2,SRRT,TENM3,UNC13A,VLDLR,ZNF609
GO:0051640	organelle localization	29	574	0.0249	ENSP00000247191,ENSP00000251047,ENSP00000251527,ENSP00000257287,ENSP00000263710,ENSP00000265148,ENSP00000273853,ENSP00000278935,ENSP00000288135,ENSP00000296137,ENSP00000317144,ENSP00000325827,ENSP00000343818,ENSP00000350719,ENSP00000353375,ENSP00000354681,ENSP00000354837,ENSP00000356379,ENSP00000356774,ENSP00000364691,ENSP00000368464,ENSP00000379709,ENSP00000380794,ENSP00000382177,ENSP00000387266…	AHI1,ARHGAP21,ARHGEF2,ASPM,CDK5RAP2,CENPC,CENPE,CEP135,CEP164,CHMP7,CKAP5,CLASP1,CROCC,DLGAP5,ESYT2,FYCO1,KIF24,KIT,LMAN1,MAP4,MYO5A,OPA1,PIBF1,PLEKHM1,SEC16A,SPIRE1,STXBP2,SYNE2,UNC13A
GO:0097435	supramolecular fiber organization	22	383	0.0249	ENSP00000225964,ENSP00000259808,ENSP00000262113,ENSP00000263710,ENSP00000304669,ENSP00000331983,ENSP00000349238,ENSP00000354837,ENSP00000358770,ENSP00000358866,ENSP00000361009,ENSP00000363557,ENSP00000368464,ENSP00000379616,ENSP00000385636,ENSP00000387266,ENSP00000406229,ENSP00000416015,ENSP00000432768,ENSP00000445043,ENSP00000452181,ENSP00000464317	ARHGEF2,CCDC88B,CKAP5,CLASP1,COL1A1,CTNNA1,FAT1,FLNA,FRY,KIF24,LRRC16A,MICAL3,MYH11,MYH3,MYOM2,MYOM3,OBSL1,PREX1,RIPK1,SLK,SPIRE1,VIPAS39
GO:0120032	regulation of plasma membrane bounded cell projection assembly	13	163	0.0249	ENSP00000257287,ENSP00000257430,ENSP00000288135,ENSP00000350719,ENSP00000353375,ENSP00000364691,ENSP00000369614,ENSP00000381023,ENSP00000389913,ENSP00000406012,ENSP00000421280,ENSP00000422591,ENSP00000477725	APC,CEP135,CNTROB,CROCC,IFT140,KANK1,KIT,MAP4,MYO10,PLEKHM1,SLIT2,SYNE2,TRPM2
GO:0070509	calcium ion import	6	35	0.0271	ENSP00000223366,ENSP00000288139,ENSP00000320025,ENSP00000354681,ENSP00000381023,ENSP00000385019	CACNA1D,CACNA1I,CACNB2,GCK,OPA1,TRPM2
GO:0001508	action potential	10	104	0.0281	ENSP00000283254,ENSP00000288139,ENSP00000303540,ENSP00000320025,ENSP00000346534,ENSP00000354923,ENSP00000356545,ENSP00000383199,ENSP00000385019,ENSP00000386306	CACNA1D,CACNA1E,CACNA1I,CACNB2,DMD,NEDD4L,SCN1A,SCN3A,SCN8A,SCN9A
GO:0030036	actin cytoskeleton organization	23	418	0.0305	ENSP00000255882,ENSP00000262113,ENSP00000274498,ENSP00000288135,ENSP00000288670,ENSP00000304669,ENSP00000329219,ENSP00000331983,ENSP00000344562,ENSP00000354837,ENSP00000358866,ENSP00000361009,ENSP00000363557,ENSP00000379616,ENSP00000385636,ENSP00000386840,ENSP00000387266,ENSP00000393511,ENSP00000406229,ENSP00000416015,ENSP00000445043,ENSP00000448955,ENSP00000464317	ABLIM2,ARHGAP26,ARHGEF2,CORO6,CTNNA1,FAT1,FLNA,FMNL1,FMNL2,FRY,GAS2L3,KIT,LRRC16A,MICAL3,MYH11,MYH3,MYOM2,MYOM3,OBSL1,PI4KA,PREX1,SPIRE1,XIRP2
GO:1902903	regulation of supramolecular fiber organization	19	316	0.0337	ENSP00000257430,ENSP00000263710,ENSP00000267163,ENSP00000275815,ENSP00000309714,ENSP00000331983,ENSP00000343818,ENSP00000347719,ENSP00000349259,ENSP00000353508,ENSP00000354837,ENSP00000358866,ENSP00000361009,ENSP00000363827,ENSP00000387266,ENSP00000405405,ENSP00000422591,ENSP00000432568,ENSP00000477725	APC,ARHGEF2,CDK5RAP2,CLASP1,EPHA1,FLNA,HSPG2,KANK1,LRRC16A,MAP2,PHLDB2,PREX1,RB1,SH3PXD2B,SLIT2,SPIRE1,SPTBN1,SPTBN2,TBCD
GO:0071688	striated muscle myosin thick filament assembly	4	13	0.0379	ENSP00000262113,ENSP00000363557,ENSP00000379616,ENSP00000385636	MYH11,MYOM2,MYOM3,OBSL1
GO:0007399	nervous system development	79	2206	0.038	ENSP00000256707,ENSP00000261772,ENSP00000263269,ENSP00000263816,ENSP00000264431,ENSP00000264498,ENSP00000265459,ENSP00000267163,ENSP00000272937,ENSP00000274498,ENSP00000288135,ENSP00000288368,ENSP00000290341,ENSP00000290401,ENSP00000297814,ENSP00000300651,ENSP00000303211,ENSP00000304669,ENSP00000305288,ENSP00000316527,ENSP00000326550,ENSP00000335196,ENSP00000338512,ENSP00000338774,ENSP00000343656…	AARS,ACAN,ACHE,AGTPBP1,AHI1,ARHGAP26,ARHGEF2,ASPM,ATRX,BCL11A,CDH23,CDK5RAP2,CIC,CTNNA1,CUL4B,DISC1,DMD,DNAH11,FEZF1,FGF2,FLNA,FN1,FRY,FZD8,GIGYF2,GLDN,GPR124,GPR98,GRIN2A,GRIN2B,GRIN2D,HES6,HSPG2,IFT140,IGF2BP1,JMJD2C,KANK1,KIDINS220,KIF27,KIT,LRP2,MACF1,MAP2,MAP4,MED1,MTCH1,MYO5A,NCAM2,NEDD4L,NLGN2,NPTN,NRXN2,OBSL1,OPA1,PREX1,PREX2,PTPRA,RAPGEF2,RAPGEF5,RARG,RB1,RELN,SCN8A,SDCBP2,SDK2,SLIT2,SOX…
GO:0051301	cell division	25	483	0.0392	ENSP00000257430,ENSP00000263710,ENSP00000265148,ENSP00000267163,ENSP00000273853,ENSP00000278935,ENSP00000286398,ENSP00000288135,ENSP00000309790,ENSP00000323421,ENSP00000326550,ENSP00000349259,ENSP00000349961,ENSP00000353375,ENSP00000354522,ENSP00000354837,ENSP00000356379,ENSP00000369614,ENSP00000376333,ENSP00000380794,ENSP00000385936,ENSP00000387266,ENSP00000416015,ENSP00000432768,ENSP00000457810	APC,ARHGEF2,ASPM,CENPC,CENPE,CENPT,CEP164,CHMP7,CKAP5,CLASP1,CNTROB,DCDC1,KIT,LLGL2,MAP4,MICAL3,MIS18BP1,RB1,SMC1A,SMC2,SMC4,SPIRE1,SPTBN1,TACC3,TOP1
GO:0051984	positive regulation of chromosome segregation	5	25	0.0407	ENSP00000247191,ENSP00000265140,ENSP00000267163,ENSP00000359292,ENSP00000440402	ANKRD32,DDX11,DLGAP5,FAM178A,RB1
GO:0062033	positive regulation of mitotic sister chromatid segregation	4	14	0.0454	ENSP00000247191,ENSP00000265140,ENSP00000267163,ENSP00000359292	ANKRD32,DLGAP5,FAM178A,RB1
GO:0007346	regulation of mitotic cell cycle	29	608	0.0487	ENSP00000161863,ENSP00000247191,ENSP00000257287,ENSP00000257430,ENSP00000263710,ENSP00000265140,ENSP00000265148,ENSP00000267163,ENSP00000278935,ENSP00000310842,ENSP00000318641,ENSP00000323421,ENSP00000326550,ENSP00000343818,ENSP00000347232,ENSP00000358770,ENSP00000359292,ENSP00000362441,ENSP00000375986,ENSP00000377710,ENSP00000384109,ENSP00000385636,ENSP00000385936,ENSP00000386810,ENSP00000387170…	ANKRD32,APC,ATRX,BLM,BRCA1,CDK5RAP2,CENPE,CEP135,CEP164,CKAP5,CLASP1,CNOT10,CUL4B,DCDC1,DLGAP5,FAM178A,FANCI,FHL1,GIGYF2,INTS3,MAP3K2,MAP3K4,OBSL1,RB1,RGPD4,SLK,SMC1A,TACC3,YTHDC2
GO:0010638	positive regulation of organelle organization	27	552	0.0487	ENSP00000202556,ENSP00000247191,ENSP00000251047,ENSP00000257287,ENSP00000263710,ENSP00000265140,ENSP00000267163,ENSP00000275815,ENSP00000294008,ENSP00000296137,ENSP00000299300,ENSP00000309714,ENSP00000325677,ENSP00000331983,ENSP00000341957,ENSP00000343818,ENSP00000354681,ENSP00000358866,ENSP00000359292,ENSP00000362441,ENSP00000364691,ENSP00000375986,ENSP00000386810,ENSP00000387266,ENSP00000418960…	ANKRD32,ATRX,BRCA1,CCT2,CDK5RAP2,CEP135,CLASP1,CROCC,DDX11,DLGAP5,EPHA1,FAM178A,FLNA,FYCO1,KMT2A,LMAN1,LRRC16A,MAP3K4,OPA1,PPP1R13B,RB1,RGPD4,RNF40,SH3PXD2B,SLX4,SPIRE1,TP53BP2
GO:0010770	positive regulation of cell morphogenesis involved in differentiation	11	136	0.0487	ENSP00000276440,ENSP00000331983,ENSP00000338774,ENSP00000346839,ENSP00000354573,ENSP00000354681,ENSP00000358866,ENSP00000361009,ENSP00000385636,ENSP00000392423,ENSP00000422591	BCL11A,DOCK5,FLNA,FN1,LRRC16A,MACF1,OBSL1,OPA1,PREX1,RELN,SLIT2
GO:0051653	spindle localization	6	41	0.0487	ENSP00000263710,ENSP00000343818,ENSP00000353375,ENSP00000354837,ENSP00000356379,ENSP00000387266	ARHGEF2,ASPM,CDK5RAP2,CLASP1,MAP4,SPIRE1
GO:0140014	mitotic nuclear division	11	136	0.0487	ENSP00000247191,ENSP00000263710,ENSP00000265148,ENSP00000267163,ENSP00000273853,ENSP00000286398,ENSP00000317144,ENSP00000323421,ENSP00000349961,ENSP00000358866,ENSP00000380794	CENPC,CENPE,CHMP7,CLASP1,DLGAP5,FLNA,PIBF1,RB1,SMC1A,SMC2,SMC4
GO:1902850	microtubule cytoskeleton organization involved in mitosis	9	94	0.0487	ENSP00000263710,ENSP00000265148,ENSP00000317144,ENSP00000326550,ENSP00000343818,ENSP00000353375,ENSP00000354837,ENSP00000358866,ENSP00000384792	ARHGEF2,CDK5RAP2,CENPE,CLASP1,FLNA,MAP4,PIBF1,TACC3,WDR62
	Function
#term ID	term description	observed gene count	background gene count	false discovery rate	matching proteins in your network (IDs)	matching proteins in your network (labels)
GO:0005524	ATP binding	88	1462	2.35e-11	ENSP00000161863,ENSP00000223366,ENSP00000245503,ENSP00000251472,ENSP00000255882,ENSP00000259808,ENSP00000261772,ENSP00000261839,ENSP00000262315,ENSP00000262623,ENSP00000262715,ENSP00000265104,ENSP00000265148,ENSP00000265594,ENSP00000270176,ENSP00000275815,ENSP00000286398,ENSP00000288135,ENSP00000288235,ENSP00000291906,ENSP00000294016,ENSP00000297814,ENSP00000299300,ENSP00000300283,ENSP00000304604…	AARS,ABCF1,ADCY9,ATAD3A,ATP4A,ATRX,BLM,CCT2,CENPE,CHTF18,CIITA,CKMT1A,CKMT1B,CPS1,DDX11,DDX31,DDX42,DHX37,DNA2,DNAH11,DNAH12,DNAH2,DNAH5,DNAH7,EP400,EPHA1,EPHA10,GCK,GPHN,HFM1,HSPA6,IKBKE,JAK3,KIAA1804,KIF16B,KIF24,KIF27,KIT,KSR1,KSR2,LONP1,MAGI1,MAGI3,MAP3K2,MAP3K4,MARK3,MAST1,MAST2,MCCC1,MDN1,MOK,MYH11,MYH2,MYH3,MYO10,MYO1E,MYO1H,MYO5A,MYO5C,MYO6,MYO9A,NLRP2,NLRP9,PAICS,PI4KA,PKN3,RIPK1,RNASEL,…
GO:0032559	adenyl ribonucleotide binding	89	1514	2.96e-11	ENSP00000161863,ENSP00000223366,ENSP00000245503,ENSP00000251472,ENSP00000255882,ENSP00000259808,ENSP00000261772,ENSP00000261839,ENSP00000262315,ENSP00000262623,ENSP00000262715,ENSP00000264431,ENSP00000265104,ENSP00000265148,ENSP00000265594,ENSP00000270176,ENSP00000275815,ENSP00000286398,ENSP00000288135,ENSP00000288235,ENSP00000291906,ENSP00000294016,ENSP00000297814,ENSP00000299300,ENSP00000300283…	AARS,ABCF1,ADCY9,ATAD3A,ATP4A,ATRX,BLM,CCT2,CENPE,CHTF18,CIITA,CKMT1A,CKMT1B,CPS1,DDX11,DDX31,DDX42,DHX37,DNA2,DNAH11,DNAH12,DNAH2,DNAH5,DNAH7,EP400,EPHA1,EPHA10,GCK,GPHN,HFM1,HSPA6,IKBKE,JAK3,KIAA1804,KIF16B,KIF24,KIF27,KIT,KSR1,KSR2,LONP1,MAGI1,MAGI3,MAP3K2,MAP3K4,MARK3,MAST1,MAST2,MCCC1,MDN1,MOK,MYH11,MYH2,MYH3,MYO10,MYO1E,MYO1H,MYO5A,MYO5C,MYO6,MYO9A,NLRP2,NLRP9,PAICS,PI4KA,PKN3,RAPGEF2,RIPK1…
GO:0005488	binding	367	11878	5.13e-10	ENSP00000007414,ENSP00000161863,ENSP00000171887,ENSP00000200453,ENSP00000202556,ENSP00000215862,ENSP00000223366,ENSP00000225964,ENSP00000228850,ENSP00000236877,ENSP00000245503,ENSP00000245907,ENSP00000247226,ENSP00000249044,ENSP00000251047,ENSP00000251472,ENSP00000251507,ENSP00000251527,ENSP00000251691,ENSP00000252674,ENSP00000252804,ENSP00000254108,ENSP00000255882,ENSP00000256707,ENSP00000257177…	AARS,ABCF1,ABLIM2,ACAN,ACAP2,ACHE,ADAMTS20,ADAMTS7,ADCY9,AGL,AGTPBP1,AHDC1,AHI1,AIM1L,AKAP3,AMOTL1,ANKRD32,APC,APOL5,ARHGAP26,ARHGEF1,ARHGEF2,ARHGEF40,ARID4B,ASPM,ATAD3A,ATP4A,ATRX,BAZ2B,BCL11A,BLM,BRCA1,BRD3,C19orf26,C3,CACNA1D,CACNA1E,CACNB2,CAMTA1,CAND1,CANT1,CBX6,CC2D1A,CCDC88B,CCL16,CCRN4L,CCT2,CDH23,CDK5RAP2,CENPC,CENPE,CENPT,CEP135,CEP350,CHGB,CHTF18,CIC,CIITA,CKAP5,CKMT1A,CKMT1B,CLASP1,CN…
GO:0008144	drug binding	92	1710	5.21e-10	ENSP00000161863,ENSP00000223366,ENSP00000245503,ENSP00000251472,ENSP00000255882,ENSP00000259808,ENSP00000261772,ENSP00000261839,ENSP00000262315,ENSP00000262623,ENSP00000262715,ENSP00000263816,ENSP00000265104,ENSP00000265148,ENSP00000265594,ENSP00000270176,ENSP00000275815,ENSP00000286398,ENSP00000288135,ENSP00000288235,ENSP00000291906,ENSP00000294016,ENSP00000297814,ENSP00000299300,ENSP00000300283…	AARS,ABCF1,ACHE,ADCY9,ATAD3A,ATP4A,ATRX,BLM,CCT2,CENPE,CHTF18,CIITA,CKMT1A,CKMT1B,CPS1,DDX11,DDX31,DDX42,DHX37,DNA2,DNAH11,DNAH12,DNAH2,DNAH5,DNAH7,EP400,EPHA1,EPHA10,GCK,GPHN,GRIN2B,HFM1,HSPA6,IKBKE,JAK3,KIAA1804,KIF16B,KIF24,KIF27,KIT,KSR1,KSR2,LONP1,LRP2,MAGI1,MAGI3,MAP3K2,MAP3K4,MARK3,MAST1,MAST2,MCCC1,MDN1,MOK,MYH11,MYH2,MYH3,MYO10,MYO1E,MYO1H,MYO5A,MYO5C,MYO6,MYO9A,NLRP2,NLRP9,NOS2,PAICS,PI…
GO:0035639	purine ribonucleoside triphosphate binding	92	1794	5.32e-09	ENSP00000161863,ENSP00000223366,ENSP00000245503,ENSP00000251472,ENSP00000255882,ENSP00000259808,ENSP00000261772,ENSP00000261839,ENSP00000262315,ENSP00000262623,ENSP00000262715,ENSP00000263116,ENSP00000265104,ENSP00000265148,ENSP00000265594,ENSP00000267396,ENSP00000270176,ENSP00000275815,ENSP00000286398,ENSP00000288135,ENSP00000288235,ENSP00000291906,ENSP00000294016,ENSP00000297814,ENSP00000299300…	AARS,ABCF1,ADCY9,ATAD3A,ATP4A,ATRX,BLM,CCT2,CENPE,CHTF18,CIITA,CKMT1A,CKMT1B,CPS1,DDX11,DDX31,DDX42,DHX37,DNA2,DNAH11,DNAH12,DNAH2,DNAH5,DNAH7,EP400,EPHA1,EPHA10,GCK,GPHN,GTPBP2,HFM1,HSPA6,IKBKE,JAK3,KIAA1804,KIF16B,KIF24,KIF27,KIT,KSR1,KSR2,LONP1,MAGI1,MAGI3,MAP3K2,MAP3K4,MARK3,MAST1,MAST2,MCCC1,MDN1,MOK,MYH11,MYH2,MYH3,MYO10,MYO1E,MYO1H,MYO5A,MYO5C,MYO6,MYO9A,NLRP2,NLRP9,OPA1,PAICS,PI4KA,PKN3,R…
GO:0032553	ribonucleotide binding	94	1868	7.11e-09	ENSP00000161863,ENSP00000223366,ENSP00000245503,ENSP00000251472,ENSP00000255882,ENSP00000259808,ENSP00000261772,ENSP00000261839,ENSP00000262315,ENSP00000262623,ENSP00000262715,ENSP00000263116,ENSP00000264431,ENSP00000265104,ENSP00000265148,ENSP00000265594,ENSP00000267396,ENSP00000270176,ENSP00000275815,ENSP00000286398,ENSP00000288135,ENSP00000288235,ENSP00000291906,ENSP00000294016,ENSP00000297814…	AARS,ABCF1,ADCY9,ATAD3A,ATP4A,ATRX,BLM,CCT2,CENPE,CHTF18,CIITA,CKMT1A,CKMT1B,CPS1,DDX11,DDX31,DDX42,DHX37,DNA2,DNAH11,DNAH12,DNAH2,DNAH5,DNAH7,EP400,EPHA1,EPHA10,GCK,GPHN,GTPBP2,HFM1,HSPA6,IKBKE,JAK3,KIAA1804,KIF16B,KIF24,KIF27,KIT,KSR1,KSR2,LONP1,MAGI1,MAGI3,MAP3K2,MAP3K4,MARK3,MAST1,MAST2,MCCC1,MDN1,MOK,MYH11,MYH2,MYH3,MYO10,MYO1E,MYO1H,MYO5A,MYO5C,MYO6,MYO9A,NLRP2,NLRP9,NOS2,OPA1,PAICS,PI4KA,P…
GO:0032555	purine ribonucleotide binding	93	1853	9.24e-09	ENSP00000161863,ENSP00000223366,ENSP00000245503,ENSP00000251472,ENSP00000255882,ENSP00000259808,ENSP00000261772,ENSP00000261839,ENSP00000262315,ENSP00000262623,ENSP00000262715,ENSP00000263116,ENSP00000264431,ENSP00000265104,ENSP00000265148,ENSP00000265594,ENSP00000267396,ENSP00000270176,ENSP00000275815,ENSP00000286398,ENSP00000288135,ENSP00000288235,ENSP00000291906,ENSP00000294016,ENSP00000297814…	AARS,ABCF1,ADCY9,ATAD3A,ATP4A,ATRX,BLM,CCT2,CENPE,CHTF18,CIITA,CKMT1A,CKMT1B,CPS1,DDX11,DDX31,DDX42,DHX37,DNA2,DNAH11,DNAH12,DNAH2,DNAH5,DNAH7,EP400,EPHA1,EPHA10,GCK,GPHN,GTPBP2,HFM1,HSPA6,IKBKE,JAK3,KIAA1804,KIF16B,KIF24,KIF27,KIT,KSR1,KSR2,LONP1,MAGI1,MAGI3,MAP3K2,MAP3K4,MARK3,MAST1,MAST2,MCCC1,MDN1,MOK,MYH11,MYH2,MYH3,MYO10,MYO1E,MYO1H,MYO5A,MYO5C,MYO6,MYO9A,NLRP2,NLRP9,OPA1,PAICS,PI4KA,PKN3,R…
GO:0043167	ion binding	218	6066	1.03e-08	ENSP00000161863,ENSP00000215862,ENSP00000223366,ENSP00000225964,ENSP00000236877,ENSP00000245503,ENSP00000251047,ENSP00000251472,ENSP00000251527,ENSP00000252804,ENSP00000254108,ENSP00000255882,ENSP00000257177,ENSP00000259808,ENSP00000261441,ENSP00000261772,ENSP00000261839,ENSP00000262315,ENSP00000262483,ENSP00000262623,ENSP00000262715,ENSP00000262719,ENSP00000263073,ENSP00000263116,ENSP00000263816…	AARS,ABCF1,ABLIM2,ACAN,ACAP2,ACHE,ADAMTS20,ADAMTS7,ADCY9,AGTPBP1,ARHGAP26,ARHGEF2,ATAD3A,ATP4A,ATRX,BAZ2B,BCL11A,BLM,BRCA1,CACNA1D,CACNA1E,CANT1,CCRN4L,CCT2,CDH23,CENPE,CHTF18,CIITA,CKMT1A,CKMT1B,COL1A1,CPS1,CRACR2B,CYP11B2,DDX11,DDX31,DDX42,DHX37,DIDO1,DMD,DNA2,DNAH11,DNAH12,DNAH2,DNAH5,DNAH7,DNLZ,EFCAB5,EP400,EPHA1,EPHA10,EPS15L1,ESYT2,EXD3,EYA2,EYS,FAN1,FAT1,FAT3,FBN1,FEZF1,FGF2,FHL1,FLG,FN1,F…
GO:0003777	microtubule motor activity	19	110	1.88e-08	ENSP00000245503,ENSP00000261839,ENSP00000265104,ENSP00000265148,ENSP00000288235,ENSP00000297814,ENSP00000311273,ENSP00000312554,ENSP00000348349,ENSP00000358994,ENSP00000368464,ENSP00000379616,ENSP00000382177,ENSP00000384164,ENSP00000421280,ENSP00000439182,ENSP00000458355,ENSP00000464317,ENSP00000475939	CENPE,DNAH11,DNAH12,DNAH2,DNAH5,DNAH7,KIF16B,KIF24,KIF27,MYH11,MYH2,MYH3,MYO10,MYO1E,MYO1H,MYO5A,MYO5C,MYO6,MYO9A
GO:0008017	microtubule binding	28	253	1.88e-08	ENSP00000245503,ENSP00000257430,ENSP00000261839,ENSP00000263710,ENSP00000265148,ENSP00000288235,ENSP00000297814,ENSP00000343818,ENSP00000348349,ENSP00000349238,ENSP00000353375,ENSP00000353508,ENSP00000354573,ENSP00000354671,ENSP00000354681,ENSP00000354837,ENSP00000356579,ENSP00000358994,ENSP00000368464,ENSP00000379616,ENSP00000382177,ENSP00000384164,ENSP00000385936,ENSP00000421280,ENSP00000432768…	APC,ARHGEF2,CCDC88B,CDK5RAP2,CENPE,CEP350,CKAP5,CLASP1,DCDC1,GAS2L3,KIF16B,KIF24,KIF27,MACF1,MAP2,MAP4,MAST2,MYH11,MYH2,MYH3,MYO10,MYO1E,MYO1H,MYO5A,MYO5C,MYO6,MYO9A,OPA1
GO:0097367	carbohydrate derivative binding	102	2163	1.88e-08	ENSP00000161863,ENSP00000223366,ENSP00000245503,ENSP00000251472,ENSP00000255882,ENSP00000259808,ENSP00000261772,ENSP00000261839,ENSP00000262315,ENSP00000262623,ENSP00000262715,ENSP00000263116,ENSP00000264431,ENSP00000264498,ENSP00000265104,ENSP00000265148,ENSP00000265594,ENSP00000267396,ENSP00000270176,ENSP00000275815,ENSP00000278353,ENSP00000286398,ENSP00000288135,ENSP00000288235,ENSP00000291906…	AARS,ABCF1,ACAN,ADCY9,ATAD3A,ATP4A,ATRX,BLM,CCT2,CENPE,CHTF18,CIITA,CKMT1A,CKMT1B,CPS1,DDX11,DDX31,DDX42,DHX37,DNA2,DNAH11,DNAH12,DNAH2,DNAH5,DNAH7,EP400,EPHA1,EPHA10,FBN1,FGF2,FN1,GCK,GPHN,GTPBP2,HFM1,HSD17B12,HSPA6,IKBKE,JAK3,KIAA1804,KIF16B,KIF24,KIF27,KIT,KSR1,KSR2,LONP1,MAGI1,MAGI3,MAP3K2,MAP3K4,MARK3,MAST1,MAST2,MCCC1,MDN1,MOK,MYH11,MYH2,MYH3,MYO10,MYO1E,MYO1H,MYO5A,MYO5C,MYO6,MYO9A,NLRP2,N…
GO:0008092	cytoskeletal protein binding	56	882	2.31e-08	ENSP00000171887,ENSP00000245503,ENSP00000254108,ENSP00000257430,ENSP00000261839,ENSP00000262113,ENSP00000263710,ENSP00000265148,ENSP00000288139,ENSP00000288235,ENSP00000288670,ENSP00000297814,ENSP00000304669,ENSP00000320025,ENSP00000329219,ENSP00000338512,ENSP00000343818,ENSP00000344562,ENSP00000347719,ENSP00000348349,ENSP00000349238,ENSP00000349259,ENSP00000350719,ENSP00000353375,ENSP00000353508…	ABLIM2,AGTPBP1,APC,ARHGEF2,BRCA1,CACNA1D,CACNB2,CCDC88B,CDK5RAP2,CENPE,CEP350,CKAP5,CLASP1,CORO6,CROCC,CTNNA1,DCDC1,DMD,FLNA,FMNL1,FMNL2,FUS,GAS2L3,KIF16B,KIF24,KIF27,MACF1,MAGI1,MAP2,MAP4,MAST2,MICAL3,MYH11,MYH2,MYH3,MYO10,MYO1E,MYO1H,MYO5A,MYO5C,MYO6,MYO9A,MYOM2,MYOM3,OBSL1,OPA1,RABGAP1,SNTB1,SPIRE1,SPTBN1,SPTBN2,SYNE2,TBCD,TNS1,XIRP2,ZNF185
GO:0015631	tubulin binding	32	344	4.09e-08	ENSP00000245503,ENSP00000257430,ENSP00000261839,ENSP00000263710,ENSP00000265148,ENSP00000288235,ENSP00000297814,ENSP00000338512,ENSP00000343818,ENSP00000347719,ENSP00000348349,ENSP00000349238,ENSP00000353375,ENSP00000353508,ENSP00000354573,ENSP00000354671,ENSP00000354681,ENSP00000354837,ENSP00000356579,ENSP00000358994,ENSP00000362751,ENSP00000368464,ENSP00000379616,ENSP00000382177,ENSP00000384164…	AGTPBP1,APC,ARHGEF2,BRCA1,CCDC88B,CDK5RAP2,CENPE,CEP350,CKAP5,CLASP1,DCDC1,GAS2L3,KIF16B,KIF24,KIF27,MACF1,MAP2,MAP4,MAST2,MYH11,MYH2,MYH3,MYO10,MYO1E,MYO1H,MYO5A,MYO5C,MYO6,MYO9A,OPA1,RABGAP1,TBCD
GO:0000166	nucleotide binding	97	2097	1.11e-07	ENSP00000161863,ENSP00000223366,ENSP00000245503,ENSP00000251472,ENSP00000255882,ENSP00000259808,ENSP00000261772,ENSP00000261839,ENSP00000262315,ENSP00000262623,ENSP00000262715,ENSP00000263116,ENSP00000264431,ENSP00000265104,ENSP00000265148,ENSP00000265594,ENSP00000267396,ENSP00000270176,ENSP00000275815,ENSP00000286398,ENSP00000288135,ENSP00000288235,ENSP00000291906,ENSP00000294016,ENSP00000297814…	AARS,ABCF1,ADCY9,ATAD3A,ATP4A,ATRX,BLM,CCT2,CENPE,CHTF18,CIITA,CKMT1A,CKMT1B,CPS1,DDX11,DDX31,DDX42,DHX37,DNA2,DNAH11,DNAH12,DNAH2,DNAH5,DNAH7,EP400,EPHA1,EPHA10,GCK,GPHN,GTPBP2,HFM1,HSPA6,IKBKE,JAK3,KIAA1804,KIF16B,KIF24,KIF27,KIT,KSR1,KSR2,LONP1,MAGI1,MAGI3,MAP3K2,MAP3K4,MARK3,MAST1,MAST2,MCCC1,MDN1,MICAL3,MOK,MYH11,MYH2,MYH3,MYO10,MYO1E,MYO1H,MYO5A,MYO5C,MYO6,MYO9A,NLRP2,NLRP9,NOS2,OPA1,PAICS,…
GO:0043168	anion binding	115	2696	1.94e-07	ENSP00000161863,ENSP00000223366,ENSP00000245503,ENSP00000251472,ENSP00000251527,ENSP00000255882,ENSP00000259808,ENSP00000261772,ENSP00000261839,ENSP00000262315,ENSP00000262623,ENSP00000262715,ENSP00000263116,ENSP00000264431,ENSP00000264498,ENSP00000265104,ENSP00000265148,ENSP00000265594,ENSP00000267396,ENSP00000270176,ENSP00000274498,ENSP00000275815,ENSP00000278353,ENSP00000286398,ENSP00000288135…	AARS,ABCF1,ACAN,ADCY9,ARHGAP26,ATAD3A,ATP4A,ATRX,BLM,CCT2,CENPE,CHTF18,CIITA,CKMT1A,CKMT1B,CPS1,DDX11,DDX31,DDX42,DHX37,DNA2,DNAH11,DNAH12,DNAH2,DNAH5,DNAH7,EP400,EPHA1,EPHA10,ESYT2,FBN1,FGF2,FN1,GCK,GPHN,GRIN2B,GTPBP2,HFM1,HSD17B12,HSPA6,IKBKE,ITPR2,JAK3,KIAA1804,KIF16B,KIF24,KIF27,KIT,KSR1,KSR2,LONP1,MAGI1,MAGI3,MAP3K2,MAP3K4,MARK3,MAST1,MAST2,MCCC1,MDN1,MICAL3,MOK,MYH11,MYH2,MYH3,MYO10,MYO1E,M…
GO:0005515	protein binding	224	6605	5e-07	ENSP00000161863,ENSP00000171887,ENSP00000200453,ENSP00000202556,ENSP00000225964,ENSP00000228850,ENSP00000236877,ENSP00000245503,ENSP00000245907,ENSP00000247226,ENSP00000251047,ENSP00000251507,ENSP00000251527,ENSP00000251691,ENSP00000252804,ENSP00000254108,ENSP00000256707,ENSP00000257287,ENSP00000257430,ENSP00000259335,ENSP00000259808,ENSP00000261839,ENSP00000262113,ENSP00000262483,ENSP00000262519…	ABLIM2,ACHE,AGL,AGTPBP1,AHI1,AKAP3,AMOTL1,ANKRD32,APC,ARHGEF1,ARHGEF2,ARHGEF40,ASPM,ATRX,BCL11A,BLM,BRCA1,BRD3,C19orf26,C3,CACNA1D,CACNB2,CAND1,CANT1,CCDC88B,CCL16,CCT2,CDK5RAP2,CENPE,CENPT,CEP135,CEP350,CHGB,CIITA,CKAP5,CLASP1,CNTROB,COL16A1,COL1A1,COL6A1,CORO6,CROCC,CTNNA1,CUL4B,DCDC1,DENND4B,DENND5B,DMD,DNAH11,DNAH2,DNAH5,DNAH7,DNLZ,DOCK5,DOCK6,EID2,EP400,EPHA1,ESYT2,EVPL,EYA2,FAM178A,FAN1,FAN…
GO:0003779	actin binding	33	413	5.25e-07	ENSP00000171887,ENSP00000245503,ENSP00000261839,ENSP00000262113,ENSP00000288235,ENSP00000288670,ENSP00000304669,ENSP00000320025,ENSP00000329219,ENSP00000344562,ENSP00000348349,ENSP00000349259,ENSP00000350719,ENSP00000354573,ENSP00000354923,ENSP00000358866,ENSP00000358994,ENSP00000363557,ENSP00000364691,ENSP00000378965,ENSP00000379616,ENSP00000382177,ENSP00000385636,ENSP00000386840,ENSP00000387266…	ABLIM2,CACNB2,CORO6,CROCC,CTNNA1,DMD,FLNA,FMNL1,FMNL2,GAS2L3,MACF1,MICAL3,MYH11,MYH2,MYH3,MYO10,MYO1E,MYO1H,MYO5A,MYO5C,MYO6,MYO9A,MYOM2,MYOM3,OBSL1,SNTB1,SPIRE1,SPTBN1,SPTBN2,SYNE2,TNS1,XIRP2,ZNF185
GO:0005085	guanyl-nucleotide exchange factor activity	28	311	6.29e-07	ENSP00000247226,ENSP00000251691,ENSP00000263269,ENSP00000264431,ENSP00000264498,ENSP00000276440,ENSP00000288135,ENSP00000288368,ENSP00000294618,ENSP00000296859,ENSP00000298694,ENSP00000310933,ENSP00000337261,ENSP00000343656,ENSP00000349259,ENSP00000354597,ENSP00000354837,ENSP00000360431,ENSP00000360916,ENSP00000361009,ENSP00000369756,ENSP00000370196,ENSP00000373734,ENSP00000379818,ENSP00000391676…	ARHGEF1,ARHGEF2,ARHGEF40,DENND4B,DENND5B,DOCK5,DOCK6,FGF2,GRIN2A,GRIN2B,GRIN2D,JAK3,KIAA1244,KIT,MADD,PLCE1,PLEKHG3,PREX1,PREX2,PTPRA,RAPGEF2,RAPGEF5,RAPGEF6,SBF1,SPATA13,SPTBN1,SPTBN2,VAV2
GO:0017016	Ras GTPase binding	37	510	6.74e-07	ENSP00000247226,ENSP00000251507,ENSP00000263269,ENSP00000264431,ENSP00000264498,ENSP00000268989,ENSP00000288135,ENSP00000288368,ENSP00000288670,ENSP00000291906,ENSP00000296859,ENSP00000298694,ENSP00000310933,ENSP00000329219,ENSP00000337261,ENSP00000343656,ENSP00000349259,ENSP00000354597,ENSP00000354837,ENSP00000358866,ENSP00000360431,ENSP00000360916,ENSP00000361009,ENSP00000362751,ENSP00000369756…	ARHGEF1,ARHGEF2,ARHGEF40,DENND4B,DENND5B,FGF2,FLNA,FMNL1,FMNL2,GRIN2A,GRIN2B,GRIN2D,JAK3,KIF16B,KIT,LLGL2,MADD,MYO5A,PKN3,PLCE1,PLEKHG3,PREX1,PREX2,PTPRA,RABGAP1,RABGAP1L,RAPGEF2,RAPGEF5,RAPGEF6,RGPD4,SBF1,SGSM2,SPATA13,SPTBN1,SPTBN2,TBC1D15,VAV2
GO:0044877	protein-containing complex binding	54	968	1.81e-06	ENSP00000245503,ENSP00000249044,ENSP00000257430,ENSP00000259808,ENSP00000261839,ENSP00000262101,ENSP00000262113,ENSP00000263073,ENSP00000263710,ENSP00000264498,ENSP00000265140,ENSP00000265148,ENSP00000278353,ENSP00000288235,ENSP00000300648,ENSP00000300651,ENSP00000301607,ENSP00000303211,ENSP00000304669,ENSP00000305653,ENSP00000313603,ENSP00000319104,ENSP00000320025,ENSP00000323421,ENSP00000325527…	ABCF1,ACHE,ANKRD32,APC,APOL5,CACNB2,CENPE,CIITA,CLASP1,COL16A1,CORO6,CPS1,CTNNA1,EVPL,FAM178A,FBN1,FGF2,FLNA,FMNL1,FN1,GCN1L1,GIT1,HSD17B12,HSPG2,LETM1,LRRC16A,MACF1,MED1,MSR1,MYH11,MYH2,MYH3,MYO10,MYO1E,MYO5A,MYO5C,MYO6,MYOM2,MYOM3,OBSL1,RIPK1,RNASEL,RNF40,SACS,SMC1A,SMG6,SPTBN1,SUPT6H,SYNE2,TSHR,UHRF1,VCP,VLDLR,ZNF185
GO:0051015	actin filament binding	19	158	1.9e-06	ENSP00000245503,ENSP00000261839,ENSP00000262113,ENSP00000288235,ENSP00000304669,ENSP00000320025,ENSP00000329219,ENSP00000344562,ENSP00000350719,ENSP00000354573,ENSP00000358866,ENSP00000358994,ENSP00000363557,ENSP00000379616,ENSP00000382177,ENSP00000385636,ENSP00000421280,ENSP00000440847,ENSP00000464317	CACNB2,CORO6,CTNNA1,FLNA,FMNL1,MACF1,MYH11,MYH2,MYH3,MYO10,MYO1E,MYO5A,MYO5C,MYO6,MYOM2,MYOM3,OBSL1,SYNE2,ZNF185
GO:0051020	GTPase binding	40	614	2.36e-06	ENSP00000247226,ENSP00000251507,ENSP00000251691,ENSP00000263269,ENSP00000264431,ENSP00000264498,ENSP00000268989,ENSP00000276440,ENSP00000288135,ENSP00000288368,ENSP00000288670,ENSP00000291906,ENSP00000294618,ENSP00000296859,ENSP00000298694,ENSP00000310933,ENSP00000329219,ENSP00000337261,ENSP00000343656,ENSP00000349259,ENSP00000354597,ENSP00000354837,ENSP00000358866,ENSP00000360431,ENSP00000360916…	ARHGEF1,ARHGEF2,ARHGEF40,DENND4B,DENND5B,DOCK5,DOCK6,FGF2,FLNA,FMNL1,FMNL2,GRIN2A,GRIN2B,GRIN2D,JAK3,KIAA1244,KIF16B,KIT,LLGL2,MADD,MYO5A,PKN3,PLCE1,PLEKHG3,PREX1,PREX2,PTPRA,RABGAP1,RABGAP1L,RAPGEF2,RAPGEF5,RAPGEF6,RGPD4,SBF1,SGSM2,SPATA13,SPTBN1,SPTBN2,TBC1D15,VAV2
GO:0036094	small molecule binding	103	2460	2.69e-06	ENSP00000007414,ENSP00000161863,ENSP00000223366,ENSP00000245503,ENSP00000251047,ENSP00000251472,ENSP00000255882,ENSP00000259808,ENSP00000261772,ENSP00000261839,ENSP00000262315,ENSP00000262623,ENSP00000262715,ENSP00000263116,ENSP00000264431,ENSP00000265104,ENSP00000265148,ENSP00000265594,ENSP00000267396,ENSP00000270176,ENSP00000275815,ENSP00000286398,ENSP00000288135,ENSP00000288235,ENSP00000291906…	AARS,ABCF1,ACAN,ADCY9,ATAD3A,ATP4A,ATRX,BLM,CCT2,CENPE,CHTF18,CIITA,CKMT1A,CKMT1B,CPS1,DDX11,DDX31,DDX42,DHX37,DNA2,DNAH11,DNAH12,DNAH2,DNAH5,DNAH7,EP400,EPHA1,EPHA10,GCK,GPHN,GRIN2B,GTPBP2,HFM1,HSPA6,IKBKE,ITPR2,JAK3,KIAA1804,KIF16B,KIF24,KIF27,KIT,KSR1,KSR2,LMAN1,LONP1,MAGI1,MAGI3,MAP3K2,MAP3K4,MARK3,MAST1,MAST2,MCCC1,MDN1,MICAL3,MOK,MYH11,MYH2,MYH3,MYO10,MYO1E,MYO1H,MYO5A,MYO5C,MYO6,MYO9A,NLRP…
GO:0005088	Ras guanyl-nucleotide exchange factor activity	23	243	4.02e-06	ENSP00000247226,ENSP00000263269,ENSP00000264431,ENSP00000264498,ENSP00000288135,ENSP00000288368,ENSP00000298694,ENSP00000310933,ENSP00000337261,ENSP00000343656,ENSP00000349259,ENSP00000354597,ENSP00000354837,ENSP00000360916,ENSP00000361009,ENSP00000369756,ENSP00000370196,ENSP00000373734,ENSP00000379818,ENSP00000391676,ENSP00000398560,ENSP00000432568,ENSP00000477455	ARHGEF1,ARHGEF2,ARHGEF40,DENND4B,DENND5B,FGF2,GRIN2A,GRIN2B,GRIN2D,JAK3,KIT,MADD,PLEKHG3,PREX1,PREX2,PTPRA,RAPGEF2,RAPGEF5,SBF1,SPATA13,SPTBN1,SPTBN2,VAV2
GO:0016887	ATPase activity	29	392	1.27e-05	ENSP00000161863,ENSP00000262623,ENSP00000265104,ENSP00000265148,ENSP00000288235,ENSP00000297814,ENSP00000310219,ENSP00000311135,ENSP00000311273,ENSP00000312554,ENSP00000313603,ENSP00000347232,ENSP00000351185,ENSP00000351777,ENSP00000352678,ENSP00000353826,ENSP00000354573,ENSP00000358400,ENSP00000359454,ENSP00000361232,ENSP00000362441,ENSP00000368464,ENSP00000384164,ENSP00000421280,ENSP00000440402…	ABCF1,ATP4A,ATRX,BLM,CENPE,DDX11,DDX31,DDX42,DHX37,DNA2,DNAH11,DNAH12,DNAH2,DNAH5,DNAH7,HFM1,HSPA6,KIF16B,KIF24,KIF27,LONP1,MACF1,MDN1,MYH3,MYO10,MYO1E,SUPV3L1,VCP,YTHDC2
GO:1901363	heterocyclic compound binding	176	5305	0.00019	ENSP00000161863,ENSP00000223366,ENSP00000245503,ENSP00000251472,ENSP00000252674,ENSP00000252804,ENSP00000254108,ENSP00000255882,ENSP00000259808,ENSP00000261772,ENSP00000261839,ENSP00000262315,ENSP00000262519,ENSP00000262623,ENSP00000262715,ENSP00000263073,ENSP00000263116,ENSP00000263857,ENSP00000264183,ENSP00000264431,ENSP00000264515,ENSP00000265104,ENSP00000265148,ENSP00000265594,ENSP00000266269…	AARS,ABCF1,ADCY9,AHDC1,ARID4B,ATAD3A,ATP4A,ATRX,BAZ2B,BCL11A,BLM,BRCA1,CAMTA1,CBX6,CC2D1A,CCRN4L,CCT2,CDK5RAP2,CENPC,CENPE,CENPT,CHTF18,CIC,CIITA,CKMT1A,CKMT1B,CPS1,CWC15,CYP11B2,DDX11,DDX31,DDX42,DHX37,DNA2,DNAH11,DNAH12,DNAH2,DNAH5,DNAH7,EP400,EPHA1,EPHA10,EXD3,FAN1,FANCI,FEZF1,FUS,FXR1,GCK,GCN1L1,GPHN,GTPBP2,HEATR1,HES6,HFM1,HIVEP2,HMGXB3,HNRNPR,HSPA6,IGF2BP1,IKBKE,IRF8,JAK3,KIAA0430,KIAA1804,…
GO:0017111	nucleoside-triphosphatase activity	41	778	0.00023	ENSP00000161863,ENSP00000245503,ENSP00000261839,ENSP00000262623,ENSP00000263116,ENSP00000265104,ENSP00000265148,ENSP00000267396,ENSP00000288235,ENSP00000297814,ENSP00000303997,ENSP00000310219,ENSP00000311135,ENSP00000311273,ENSP00000312554,ENSP00000313603,ENSP00000347232,ENSP00000348349,ENSP00000351185,ENSP00000351777,ENSP00000352678,ENSP00000353826,ENSP00000354573,ENSP00000354681,ENSP00000358400…	ABCF1,ATP4A,ATRX,BLM,CENPE,DDX11,DDX31,DDX42,DHX37,DNA2,DNAH11,DNAH12,DNAH2,DNAH5,DNAH7,EP400,GTPBP2,HFM1,HSPA6,KIF16B,KIF24,KIF27,LONP1,MACF1,MDN1,MYH11,MYH2,MYH3,MYO10,MYO1E,MYO1H,MYO5A,MYO5C,MYO6,MYO9A,OPA1,RAB36,REM2,SUPV3L1,VCP,YTHDC2
GO:0097159	organic cyclic compound binding	177	5382	0.00028	ENSP00000007414,ENSP00000161863,ENSP00000223366,ENSP00000245503,ENSP00000251472,ENSP00000252674,ENSP00000252804,ENSP00000254108,ENSP00000255882,ENSP00000259808,ENSP00000261772,ENSP00000261839,ENSP00000262315,ENSP00000262519,ENSP00000262623,ENSP00000262715,ENSP00000263073,ENSP00000263116,ENSP00000263857,ENSP00000264183,ENSP00000264431,ENSP00000264515,ENSP00000265104,ENSP00000265148,ENSP00000265594…	AARS,ABCF1,ADCY9,AHDC1,ARID4B,ATAD3A,ATP4A,ATRX,BAZ2B,BCL11A,BLM,BRCA1,CAMTA1,CBX6,CC2D1A,CCRN4L,CCT2,CDK5RAP2,CENPC,CENPE,CENPT,CHTF18,CIC,CIITA,CKMT1A,CKMT1B,CPS1,CWC15,CYP11B2,DDX11,DDX31,DDX42,DHX37,DNA2,DNAH11,DNAH12,DNAH2,DNAH5,DNAH7,EP400,EPHA1,EPHA10,EXD3,FAN1,FANCI,FEZF1,FUS,FXR1,GCK,GCN1L1,GPHN,GTPBP2,HEATR1,HES6,HFM1,HIVEP2,HMGXB3,HNRNPR,HSPA6,IGF2BP1,IKBKE,IRF8,JAK3,KIAA0430,KIAA1804,…
GO:0016462	pyrophosphatase activity	42	819	0.00031	ENSP00000161863,ENSP00000245503,ENSP00000261839,ENSP00000262623,ENSP00000263116,ENSP00000265104,ENSP00000265148,ENSP00000267396,ENSP00000288235,ENSP00000297814,ENSP00000303997,ENSP00000307674,ENSP00000310219,ENSP00000311135,ENSP00000311273,ENSP00000312554,ENSP00000313603,ENSP00000347232,ENSP00000348349,ENSP00000351185,ENSP00000351777,ENSP00000352678,ENSP00000353826,ENSP00000354573,ENSP00000354681…	ABCF1,ATP4A,ATRX,BLM,CANT1,CENPE,DDX11,DDX31,DDX42,DHX37,DNA2,DNAH11,DNAH12,DNAH2,DNAH5,DNAH7,EP400,GTPBP2,HFM1,HSPA6,KIF16B,KIF24,KIF27,LONP1,MACF1,MDN1,MYH11,MYH2,MYH3,MYO10,MYO1E,MYO1H,MYO5A,MYO5C,MYO6,MYO9A,OPA1,RAB36,REM2,SUPV3L1,VCP,YTHDC2
GO:0005516	calmodulin binding	17	194	0.00034	ENSP00000236877,ENSP00000245503,ENSP00000261839,ENSP00000288235,ENSP00000327251,ENSP00000343818,ENSP00000349259,ENSP00000353508,ENSP00000356379,ENSP00000358994,ENSP00000378965,ENSP00000379616,ENSP00000382177,ENSP00000410309,ENSP00000421280,ENSP00000429562,ENSP00000464317	ASPM,CDK5RAP2,MAP2,MYH11,MYH2,MYH3,MYO10,MYO1E,MYO5A,MYO5C,MYO6,NOS2,PDE1A,SLC8A2,SNTB1,SPTBN1,UNC13A
GO:0015085	calcium ion transmembrane transporter activity	14	135	0.00034	ENSP00000236877,ENSP00000263269,ENSP00000288139,ENSP00000305653,ENSP00000320025,ENSP00000335029,ENSP00000354006,ENSP00000356545,ENSP00000370744,ENSP00000373734,ENSP00000379818,ENSP00000381023,ENSP00000385019,ENSP00000477455	CACNA1D,CACNA1E,CACNA1I,CACNB2,DENND5B,GRIN2A,GRIN2B,GRIN2D,ITPR2,LETM1,RASA3,SLC8A2,TRPM2,TRPM6
GO:0042623	ATPase activity, coupled	22	320	0.00068	ENSP00000161863,ENSP00000262623,ENSP00000265104,ENSP00000288235,ENSP00000297814,ENSP00000310219,ENSP00000311135,ENSP00000311273,ENSP00000347232,ENSP00000351185,ENSP00000352678,ENSP00000353826,ENSP00000359454,ENSP00000361232,ENSP00000362441,ENSP00000384164,ENSP00000421280,ENSP00000440402,ENSP00000458355,ENSP00000464050,ENSP00000464317,ENSP00000475939	ATP4A,ATRX,BLM,DDX11,DDX31,DDX42,DHX37,DNA2,DNAH11,DNAH2,DNAH5,DNAH7,HFM1,HSPA6,KIF16B,KIF27,LONP1,MYH3,MYO10,MYO1E,SUPV3L1,YTHDC2
GO:0046872	metal ion binding	139	4087	0.00071	ENSP00000215862,ENSP00000225964,ENSP00000236877,ENSP00000251047,ENSP00000251472,ENSP00000251527,ENSP00000252804,ENSP00000254108,ENSP00000257177,ENSP00000261441,ENSP00000261772,ENSP00000262483,ENSP00000262623,ENSP00000262719,ENSP00000263073,ENSP00000263816,ENSP00000263857,ENSP00000264151,ENSP00000264431,ENSP00000265459,ENSP00000265594,ENSP00000266070,ENSP00000266269,ENSP00000267807,ENSP00000277225…	AARS,ABLIM2,ACAN,ACAP2,ADAMTS20,ADAMTS7,ADCY9,AGTPBP1,ARHGEF2,ATP4A,ATRX,BAZ2B,BCL11A,BLM,BRCA1,CACNA1D,CACNA1E,CANT1,CCRN4L,CDH23,COL1A1,CPS1,CRACR2B,CYP11B2,DDX11,DIDO1,DMD,DNA2,DNAH7,DNLZ,EFCAB5,EPS15L1,ESYT2,EXD3,EYA2,EYS,FAN1,FAT1,FAT3,FBN1,FEZF1,FHL1,FLG,FREM1,FUS,FYCO1,GIT1,GPHN,GPR98,GRIN2A,GRIN2B,HIVEP2,HSPG2,ITPR2,JMJD2C,KIT,KMT2A,KSR1,KSR2,LETM1,LMAN1,LONRF2,LRP1B,LRP2,MACF1,MAP3K2,MAP…
GO:0000146	microfilament motor activity	6	21	0.00073	ENSP00000245503,ENSP00000288235,ENSP00000358994,ENSP00000382177,ENSP00000421280,ENSP00000464317	MYH2,MYH3,MYO10,MYO1E,MYO5A,MYO6
GO:0005262	calcium channel activity	12	114	0.0011	ENSP00000263269,ENSP00000288139,ENSP00000320025,ENSP00000335029,ENSP00000354006,ENSP00000356545,ENSP00000370744,ENSP00000373734,ENSP00000379818,ENSP00000381023,ENSP00000385019,ENSP00000477455	CACNA1D,CACNA1E,CACNA1I,CACNB2,DENND5B,GRIN2A,GRIN2B,GRIN2D,ITPR2,RASA3,TRPM2,TRPM6
GO:0043169	cation binding	140	4170	0.0011	ENSP00000215862,ENSP00000225964,ENSP00000236877,ENSP00000251047,ENSP00000251472,ENSP00000251527,ENSP00000252804,ENSP00000254108,ENSP00000257177,ENSP00000261441,ENSP00000261772,ENSP00000262483,ENSP00000262623,ENSP00000262719,ENSP00000263073,ENSP00000263816,ENSP00000263857,ENSP00000264151,ENSP00000264431,ENSP00000265459,ENSP00000265594,ENSP00000266070,ENSP00000266269,ENSP00000267807,ENSP00000277225…	AARS,ABLIM2,ACAN,ACAP2,ACHE,ADAMTS20,ADAMTS7,ADCY9,AGTPBP1,ARHGEF2,ATP4A,ATRX,BAZ2B,BCL11A,BLM,BRCA1,CACNA1D,CACNA1E,CANT1,CCRN4L,CDH23,COL1A1,CPS1,CRACR2B,CYP11B2,DDX11,DIDO1,DMD,DNA2,DNAH7,DNLZ,EFCAB5,EPS15L1,ESYT2,EXD3,EYA2,EYS,FAN1,FAT1,FAT3,FBN1,FEZF1,FHL1,FLG,FREM1,FUS,FYCO1,GIT1,GPHN,GPR98,GRIN2A,GRIN2B,HIVEP2,HSPG2,ITPR2,JMJD2C,KIT,KMT2A,KSR1,KSR2,LETM1,LMAN1,LONRF2,LRP1B,LRP2,MACF1,MAP3K…
GO:0099604	ligand-gated calcium channel activity	6	24	0.0013	ENSP00000263269,ENSP00000335029,ENSP00000370744,ENSP00000379818,ENSP00000381023,ENSP00000477455	GRIN2A,GRIN2B,GRIN2D,ITPR2,RASA3,TRPM2
GO:0005096	GTPase activator activity	19	278	0.0022	ENSP00000241051,ENSP00000251507,ENSP00000264431,ENSP00000268989,ENSP00000274498,ENSP00000288368,ENSP00000324287,ENSP00000335029,ENSP00000337261,ENSP00000341489,ENSP00000347719,ENSP00000348349,ENSP00000354109,ENSP00000361009,ENSP00000362751,ENSP00000376333,ENSP00000378338,ENSP00000379709,ENSP00000448182	ACAP2,ARHGAP21,ARHGAP26,ARHGEF1,DEPDC7,GIT1,LLGL2,MYO9A,PREX1,PREX2,RABGAP1,RABGAP1L,RAPGEF2,RASA3,RGS22,SGSM2,SYDE1,TBC1D15,TBCD
GO:0019899	enzyme binding	82	2197	0.0024	ENSP00000161863,ENSP00000200453,ENSP00000225964,ENSP00000247226,ENSP00000251507,ENSP00000251691,ENSP00000257430,ENSP00000259808,ENSP00000262113,ENSP00000262483,ENSP00000262715,ENSP00000263073,ENSP00000263269,ENSP00000263915,ENSP00000264431,ENSP00000264498,ENSP00000265140,ENSP00000267163,ENSP00000268989,ENSP00000275815,ENSP00000276440,ENSP00000282096,ENSP00000288135,ENSP00000288368,ENSP00000288670…	ANKRD32,APC,ARHGEF1,ARHGEF2,ARHGEF40,ASPM,BRCA1,CCT2,CDK5RAP2,COL1A1,CUL4B,DENND4B,DENND5B,DMD,DOCK5,DOCK6,EPHA1,FAM178A,FANCI,FGF2,FLNA,FMNL1,FMNL2,FN1,FZD8,GCN1L1,GRB14,GRIN2A,GRIN2B,GRIN2D,HSPA6,IKBKE,JAK3,JMJD2C,KIAA1244,KIF16B,KIT,KSR1,LLGL2,LONP1,LONRF2,MADD,MAP3K2,MAST2,MYO5A,MYOM2,OPA1,PDE3B,PITPNM3,PKN3,PLCE1,PLEKHG3,PPP1R15A,PREX1,PREX2,PTPLB,PTPRA,RABGAP1,RABGAP1L,RAPGEF2,RAPGEF5,RAPGE…
GO:0030695	GTPase regulator activity	20	307	0.0025	ENSP00000241051,ENSP00000251507,ENSP00000264431,ENSP00000268989,ENSP00000274498,ENSP00000288368,ENSP00000324287,ENSP00000335029,ENSP00000337261,ENSP00000341489,ENSP00000347719,ENSP00000348349,ENSP00000354109,ENSP00000361009,ENSP00000362751,ENSP00000376333,ENSP00000378338,ENSP00000379709,ENSP00000422591,ENSP00000448182	ACAP2,ARHGAP21,ARHGAP26,ARHGEF1,DEPDC7,GIT1,LLGL2,MYO9A,PREX1,PREX2,RABGAP1,RABGAP1L,RAPGEF2,RASA3,RGS22,SGSM2,SLIT2,SYDE1,TBC1D15,TBCD
GO:0098772	molecular function regulator	69	1793	0.0037	ENSP00000200453,ENSP00000241051,ENSP00000245907,ENSP00000247226,ENSP00000251507,ENSP00000251691,ENSP00000252804,ENSP00000256707,ENSP00000257430,ENSP00000263269,ENSP00000264431,ENSP00000264433,ENSP00000264498,ENSP00000265459,ENSP00000268989,ENSP00000274498,ENSP00000276440,ENSP00000288135,ENSP00000288368,ENSP00000294008,ENSP00000294618,ENSP00000295550,ENSP00000296859,ENSP00000298694,ENSP00000300648…	ACAP2,ANKRD36C,APC,ARHGAP21,ARHGAP26,ARHGEF1,ARHGEF2,ARHGEF40,C3,CCL16,CHGB,COL6A3,DENND4B,DENND5B,DEPDC7,DOCK5,DOCK6,FBN1,FGF2,FLNA,FN1,FNIP2,FRY,GCN1L1,GIT1,GRIN2A,GRIN2B,GRIN2D,IKBKE,ITIH3,JAK3,KIAA1244,KIDINS220,KIT,LLGL2,MADD,MYO9A,NEDD4L,NRXN2,PLCE1,PLEKHG3,PPP1R15A,PREX1,PREX2,PTPRA,PXDN,RABGAP1,RABGAP1L,RAPGEF2,RAPGEF5,RAPGEF6,RASA3,RGS22,SAA1,SAA2,SBF1,SGSM2,SH3PXD2B,SLIT2,SLX4,SPATA13,S…
GO:0060589	nucleoside-triphosphatase regulator activity	21	345	0.004	ENSP00000241051,ENSP00000251507,ENSP00000264431,ENSP00000264433,ENSP00000268989,ENSP00000274498,ENSP00000288368,ENSP00000324287,ENSP00000335029,ENSP00000337261,ENSP00000341489,ENSP00000347719,ENSP00000348349,ENSP00000354109,ENSP00000361009,ENSP00000362751,ENSP00000376333,ENSP00000378338,ENSP00000379709,ENSP00000422591,ENSP00000448182	ACAP2,ARHGAP21,ARHGAP26,ARHGEF1,DEPDC7,FNIP2,GIT1,LLGL2,MYO9A,PREX1,PREX2,RABGAP1,RABGAP1L,RAPGEF2,RASA3,RGS22,SGSM2,SLIT2,SYDE1,TBC1D15,TBCD
GO:1990939	ATP-dependent microtubule motor activity	6	32	0.0045	ENSP00000265104,ENSP00000297814,ENSP00000311273,ENSP00000384164,ENSP00000458355,ENSP00000475939	DNAH11,DNAH2,DNAH5,DNAH7,KIF16B,KIF27
GO:0051393	alpha-actinin binding	6	34	0.0058	ENSP00000262113,ENSP00000288139,ENSP00000363557,ENSP00000385450,ENSP00000385636,ENSP00000386840	CACNA1D,MAGI1,MYOM2,MYOM3,OBSL1,XIRP2
GO:0003917	DNA topoisomerase type I activity	3	4	0.0071	ENSP00000354522,ENSP00000381773,ENSP00000442336	TOP1,TOP3A,TOP3B
GO:0005248	voltage-gated sodium channel activity	5	23	0.0076	ENSP00000283254,ENSP00000303540,ENSP00000346534,ENSP00000385019,ENSP00000386306	CACNA1I,SCN1A,SCN3A,SCN8A,SCN9A
GO:0016772	transferase activity, transferring phosphorus-containing groups	42	982	0.0088	ENSP00000223366,ENSP00000251472,ENSP00000255882,ENSP00000257177,ENSP00000259808,ENSP00000262715,ENSP00000263857,ENSP00000264498,ENSP00000270176,ENSP00000275815,ENSP00000288135,ENSP00000291906,ENSP00000300283,ENSP00000304604,ENSP00000311684,ENSP00000343248,ENSP00000346644,ENSP00000354006,ENSP00000354522,ENSP00000354671,ENSP00000355304,ENSP00000355583,ENSP00000356530,ENSP00000358770,ENSP00000362139…	CIITA,CKMT1A,CKMT1B,EPHA1,EPHA10,FGF2,GCK,GPHN,HMGXB3,IKBKE,JAK3,KIAA1804,KIT,KSR1,KSR2,MAGI3,MAP3K2,MAP3K4,MARK3,MAST1,MAST2,MOK,PCYT2,PI4KA,PKN3,POLR1A,POLR1B,RIPK1,RNASEL,RPS6KA2,RPS6KL1,SBK1,SCYL1,SLK,SMG1,SPEG,TEP1,TOP1,TRPM6,ULK3,VRK2,ZCCHC11
GO:0022849	glutamate-gated calcium ion channel activity	3	5	0.0106	ENSP00000263269,ENSP00000379818,ENSP00000477455	GRIN2A,GRIN2B,GRIN2D
GO:0030676	Rac guanyl-nucleotide exchange factor activity	4	14	0.0114	ENSP00000288368,ENSP00000354837,ENSP00000361009,ENSP00000398560	ARHGEF2,PREX1,PREX2,SPATA13
GO:0005089	Rho guanyl-nucleotide exchange factor activity	8	76	0.0136	ENSP00000247226,ENSP00000288368,ENSP00000298694,ENSP00000337261,ENSP00000354837,ENSP00000360916,ENSP00000361009,ENSP00000398560	ARHGEF1,ARHGEF2,ARHGEF40,PLEKHG3,PREX1,PREX2,SPATA13,VAV2
GO:0008569	ATP-dependent microtubule motor activity, minus-end-directed	4	15	0.0136	ENSP00000265104,ENSP00000311273,ENSP00000458355,ENSP00000475939	DNAH11,DNAH2,DNAH5,DNAH7
GO:0017048	Rho GTPase binding	12	162	0.0148	ENSP00000247226,ENSP00000288368,ENSP00000288670,ENSP00000291906,ENSP00000298694,ENSP00000329219,ENSP00000337261,ENSP00000354837,ENSP00000358866,ENSP00000360916,ENSP00000361009,ENSP00000398560	ARHGEF1,ARHGEF2,ARHGEF40,FLNA,FMNL1,FMNL2,PKN3,PLEKHG3,PREX1,PREX2,SPATA13,VAV2
GO:0016301	kinase activity	36	835	0.0167	ENSP00000223366,ENSP00000251472,ENSP00000255882,ENSP00000259808,ENSP00000264498,ENSP00000270176,ENSP00000275815,ENSP00000288135,ENSP00000291906,ENSP00000300283,ENSP00000304604,ENSP00000311684,ENSP00000343248,ENSP00000346644,ENSP00000354006,ENSP00000354522,ENSP00000354671,ENSP00000355304,ENSP00000355583,ENSP00000356530,ENSP00000358770,ENSP00000362139,ENSP00000375986,ENSP00000381958,ENSP00000387246…	CIITA,CKMT1A,CKMT1B,EPHA1,EPHA10,FGF2,GCK,HMGXB3,IKBKE,JAK3,KIAA1804,KIT,KSR1,KSR2,MAGI3,MAP3K2,MAP3K4,MARK3,MAST1,MAST2,MOK,PI4KA,PKN3,RIPK1,RNASEL,RPS6KA2,RPS6KL1,SBK1,SCYL1,SLK,SMG1,SPEG,TOP1,TRPM6,ULK3,VRK2
GO:0051959	dynein light intermediate chain binding	5	29	0.0167	ENSP00000265104,ENSP00000311273,ENSP00000349238,ENSP00000458355,ENSP00000475939	CCDC88B,DNAH11,DNAH2,DNAH5,DNAH7
GO:0005272	sodium channel activity	6	45	0.0176	ENSP00000283254,ENSP00000303540,ENSP00000346534,ENSP00000381023,ENSP00000385019,ENSP00000386306	CACNA1I,SCN1A,SCN3A,SCN8A,SCN9A,TRPM2
GO:0008047	enzyme activator activity	25	510	0.0176	ENSP00000200453,ENSP00000241051,ENSP00000251507,ENSP00000264431,ENSP00000268989,ENSP00000274498,ENSP00000288368,ENSP00000294008,ENSP00000309714,ENSP00000310933,ENSP00000324287,ENSP00000335029,ENSP00000337261,ENSP00000341489,ENSP00000346839,ENSP00000347719,ENSP00000348349,ENSP00000351777,ENSP00000354109,ENSP00000361009,ENSP00000362751,ENSP00000376333,ENSP00000378338,ENSP00000379709,ENSP00000448182	ACAP2,ARHGAP21,ARHGAP26,ARHGEF1,DEPDC7,FN1,GIT1,LLGL2,MADD,MYO9A,PPP1R15A,PREX1,PREX2,RABGAP1,RABGAP1L,RAPGEF2,RASA3,RGS22,SGSM2,SH3PXD2B,SLX4,SYDE1,TBC1D15,TBCD,VCP
GO:0097493	structural molecule activity conferring elasticity	4	17	0.0181	ENSP00000262113,ENSP00000325527,ENSP00000363557,ENSP00000385636	FBN1,MYOM2,MYOM3,OBSL1
GO:0004972	NMDA glutamate receptor activity	3	7	0.0182	ENSP00000263269,ENSP00000379818,ENSP00000477455	GRIN2A,GRIN2B,GRIN2D
GO:0017108	5'-flap endonuclease activity	3	7	0.0182	ENSP00000294008,ENSP00000351185,ENSP00000354497	DNA2,FAN1,SLX4
GO:0051880	G-quadruplex DNA binding	3	7	0.0182	ENSP00000347232,ENSP00000353826,ENSP00000440402	BLM,DDX11,LONP1
GO:0004386	helicase activity	11	147	0.0187	ENSP00000161863,ENSP00000311135,ENSP00000347232,ENSP00000351185,ENSP00000352678,ENSP00000359454,ENSP00000361232,ENSP00000362441,ENSP00000374213,ENSP00000440402,ENSP00000464050	ATRX,BLM,DDX11,DDX31,DDX42,DHX37,DNA2,EP400,HFM1,SUPV3L1,YTHDC2
GO:0004672	protein kinase activity	29	635	0.0187	ENSP00000251472,ENSP00000259808,ENSP00000264498,ENSP00000270176,ENSP00000275815,ENSP00000288135,ENSP00000291906,ENSP00000311684,ENSP00000343248,ENSP00000346644,ENSP00000354006,ENSP00000354522,ENSP00000354671,ENSP00000355304,ENSP00000355583,ENSP00000356530,ENSP00000358770,ENSP00000362139,ENSP00000375986,ENSP00000381958,ENSP00000387246,ENSP00000389715,ENSP00000391676,ENSP00000400312,ENSP00000402515…	EPHA1,EPHA10,FGF2,IKBKE,JAK3,KIAA1804,KIT,KSR1,KSR2,MAP3K2,MAP3K4,MARK3,MAST1,MAST2,MOK,PKN3,RIPK1,RNASEL,RPS6KA2,RPS6KL1,SBK1,SCYL1,SLK,SMG1,SPEG,TOP1,TRPM6,ULK3,VRK2
GO:0008186	RNA-dependent ATPase activity	7	67	0.023	ENSP00000161863,ENSP00000311135,ENSP00000352678,ENSP00000359454,ENSP00000361232,ENSP00000440402,ENSP00000464050	DDX11,DDX31,DDX42,DHX37,HFM1,SUPV3L1,YTHDC2
GO:0140030	modification-dependent protein binding	10	131	0.0252	ENSP00000264515,ENSP00000294724,ENSP00000305918,ENSP00000351777,ENSP00000354497,ENSP00000362441,ENSP00000436786,ENSP00000440190,ENSP00000464030,ENSP00000479617	AGL,ATRX,BRD3,FAN1,IKBKE,KMT2A,RBBP5,TDRD3,UHRF1,VCP
GO:0002162	dystroglycan binding	3	9	0.0282	ENSP00000263710,ENSP00000353508,ENSP00000354923	CLASP1,DMD,MAP2
GO:0008026	ATP-dependent helicase activity	8	90	0.0282	ENSP00000161863,ENSP00000311135,ENSP00000347232,ENSP00000352678,ENSP00000359454,ENSP00000361232,ENSP00000440402,ENSP00000464050	BLM,DDX11,DDX31,DDX42,DHX37,HFM1,SUPV3L1,YTHDC2
GO:0005261	cation channel activity	17	316	0.0331	ENSP00000263269,ENSP00000283254,ENSP00000288139,ENSP00000303540,ENSP00000304127,ENSP00000320025,ENSP00000335029,ENSP00000346534,ENSP00000354006,ENSP00000356545,ENSP00000370744,ENSP00000373734,ENSP00000379818,ENSP00000381023,ENSP00000385019,ENSP00000386306,ENSP00000477455	CACNA1D,CACNA1E,CACNA1I,CACNB2,DENND5B,GRIN2A,GRIN2B,GRIN2D,ITPR2,KCNG3,RASA3,SCN1A,SCN3A,SCN8A,SCN9A,TRPM2,TRPM6
GO:0042974	retinoic acid receptor binding	4	23	0.0389	ENSP00000254108,ENSP00000300651,ENSP00000358778,ENSP00000388510	FUS,LRIF1,MED1,RARG
GO:0004674	protein serine/threonine kinase activity	21	444	0.048	ENSP00000251472,ENSP00000259808,ENSP00000291906,ENSP00000311684,ENSP00000343248,ENSP00000346644,ENSP00000354006,ENSP00000354522,ENSP00000354671,ENSP00000355304,ENSP00000355583,ENSP00000358770,ENSP00000375986,ENSP00000387246,ENSP00000389715,ENSP00000400312,ENSP00000402515,ENSP00000408002,ENSP00000411397,ENSP00000427015,ENSP00000464030	IKBKE,KIAA1804,KSR2,MAP3K2,MAP3K4,MARK3,MAST1,MAST2,MOK,PKN3,RIPK1,RPS6KA2,RPS6KL1,SBK1,SLK,SMG1,SPEG,TOP1,TRPM6,ULK3,VRK2
GO:0003678	DNA helicase activity	5	41	0.0489	ENSP00000347232,ENSP00000351185,ENSP00000352678,ENSP00000362441,ENSP00000440402	ATRX,BLM,DDX11,DNA2,SUPV3L1
GO:0045503	dynein light chain binding	4	25	0.0489	ENSP00000265104,ENSP00000311273,ENSP00000458355,ENSP00000475939	DNAH11,DNAH2,DNAH5,DNAH7
	Component
#term ID	term description	observed gene count	background gene count	false discovery rate	matching proteins in your network (IDs)	matching proteins in your network (labels)
GO:0043232	intracellular non-membrane-bounded organelle	177	4005	4.28e-13	ENSP00000161863,ENSP00000171887,ENSP00000245503,ENSP00000247191,ENSP00000251047,ENSP00000251472,ENSP00000252674,ENSP00000257177,ENSP00000257287,ENSP00000257430,ENSP00000259335,ENSP00000261839,ENSP00000262102,ENSP00000262113,ENSP00000262315,ENSP00000262519,ENSP00000262715,ENSP00000263073,ENSP00000263710,ENSP00000263857,ENSP00000264515,ENSP00000265104,ENSP00000265140,ENSP00000265148,ENSP00000266070…	ABCF1,ABLIM2,AGTPBP1,AHI1,ANKRD26,ANKRD32,APC,ARHGAP21,ARHGAP26,ARHGEF2,ASPM,ATAD3A,ATRX,BLM,BRCA1,CACNA1D,CAMTA1,CBX6,CC2D1A,CCDC141,CCDC38,CCDC88B,CCRN4L,CCT2,CDK5RAP2,CENPC,CENPE,CENPT,CEP135,CEP164,CEP170B,CEP350,CEP85L,CHTF18,CKAP5,CLASP1,CMYA5,CNTROB,CORO6,CPS1,CROCC,CTNNA1,DCDC1,DDX11,DDX31,DDX42,DHX37,DIDO1,DISC1,DLGAP5,DMD,DNA2,DNAH11,DNAH12,DNAH2,DNAH5,DNAH7,EP400,EVPL,FAM178A,FLG,FLNA,…
GO:0005622	intracellular	421	14286	3.26e-11	ENSP00000007414,ENSP00000161863,ENSP00000171887,ENSP00000200453,ENSP00000202556,ENSP00000215862,ENSP00000219689,ENSP00000222145,ENSP00000223366,ENSP00000225964,ENSP00000228850,ENSP00000241051,ENSP00000245503,ENSP00000245907,ENSP00000247191,ENSP00000249044,ENSP00000249344,ENSP00000251047,ENSP00000251472,ENSP00000251507,ENSP00000251527,ENSP00000251691,ENSP00000252674,ENSP00000252804,ENSP00000254029…	AARS,ABCF1,ABLIM2,ACAN,ACAP2,ACHE,ADAMTS7,ADAMTSL1,ADCY9,AFF1,AGL,AGTPBP1,AHI1,AKAP3,AMOTL1,ANKRD12,ANKRD26,ANKRD32,AP1G2,APC,APOL5,ARHGAP21,ARHGAP26,ARHGEF1,ARHGEF2,ARHGEF40,ARID4B,ASPM,ATAD3A,ATRX,BAZ2B,BCL11A,BICC1,BLM,BRCA1,BRD3,C19orf26,C3,CACNA1D,CAMTA1,CAND1,CANT1,CASP7,CBX6,CC2D1A,CCDC141,CCDC38,CCDC88B,CCRN4L,CCT2,CDK5RAP2,CENPC,CENPE,CENPT,CEP135,CEP164,CEP170B,CEP350,CEP85L,CHGB,CHMP7,…
GO:0044424	intracellular part	414	13996	7.49e-11	ENSP00000007414,ENSP00000161863,ENSP00000171887,ENSP00000200453,ENSP00000202556,ENSP00000215862,ENSP00000219689,ENSP00000222145,ENSP00000223366,ENSP00000225964,ENSP00000228850,ENSP00000241051,ENSP00000245503,ENSP00000245907,ENSP00000247191,ENSP00000249044,ENSP00000249344,ENSP00000251047,ENSP00000251472,ENSP00000251507,ENSP00000251527,ENSP00000251691,ENSP00000252674,ENSP00000252804,ENSP00000254029…	AARS,ABCF1,ABLIM2,ACAN,ACAP2,ACHE,ADAMTS7,ADAMTSL1,ADCY9,AFF1,AGL,AGTPBP1,AHI1,AKAP3,AMOTL1,ANKRD12,ANKRD26,ANKRD32,AP1G2,APC,APOL5,ARHGAP21,ARHGAP26,ARHGEF1,ARHGEF2,ARHGEF40,ARID4B,ASPM,ATAD3A,ATRX,BAZ2B,BCL11A,BICC1,BLM,BRCA1,BRD3,C19orf26,C3,CACNA1D,CAMTA1,CAND1,CANT1,CASP7,CBX6,CC2D1A,CCDC141,CCDC38,CCDC88B,CCRN4L,CCT2,CDK5RAP2,CENPC,CENPE,CENPT,CEP135,CEP164,CEP170B,CEP350,CEP85L,CHGB,CHMP7,…
GO:0005856	cytoskeleton	105	2068	2.73e-10	ENSP00000171887,ENSP00000245503,ENSP00000247191,ENSP00000251472,ENSP00000257287,ENSP00000257430,ENSP00000259335,ENSP00000261839,ENSP00000262102,ENSP00000262113,ENSP00000263710,ENSP00000265104,ENSP00000265140,ENSP00000265148,ENSP00000266070,ENSP00000267163,ENSP00000270176,ENSP00000274498,ENSP00000278935,ENSP00000287380,ENSP00000288235,ENSP00000296859,ENSP00000297814,ENSP00000299300,ENSP00000301607…	ABLIM2,AHI1,ANKRD26,ANKRD32,APC,ARHGAP21,ARHGAP26,ARHGEF2,ASPM,BRCA1,CC2D1A,CCDC141,CCDC38,CCDC88B,CCT2,CDK5RAP2,CENPE,CEP135,CEP164,CEP170B,CEP350,CEP85L,CKAP5,CLASP1,CNTROB,CORO6,CROCC,CTNNA1,DCDC1,DDX11,DIDO1,DISC1,DLGAP5,DMD,DNAH11,DNAH12,DNAH2,DNAH5,DNAH7,EVPL,FLG,FLNA,FRY,GAS2L3,GPHN,HSPA6,IFT140,JAK3,KAZN,KIAA0368,KIF16B,KIF24,KIF27,LRIF1,LRRC16A,LRRC48,MACF1,MAP2,MAP4,MAP7D1,MAST1,MAST2,M…
GO:0043226	organelle	377	12432	1.34e-09	ENSP00000007414,ENSP00000161863,ENSP00000171887,ENSP00000200453,ENSP00000202556,ENSP00000215862,ENSP00000219689,ENSP00000222145,ENSP00000223366,ENSP00000225964,ENSP00000228850,ENSP00000245503,ENSP00000245907,ENSP00000247191,ENSP00000251047,ENSP00000251472,ENSP00000251507,ENSP00000251527,ENSP00000251691,ENSP00000252674,ENSP00000252804,ENSP00000254029,ENSP00000254108,ENSP00000255882,ENSP00000256707…	ABCF1,ABLIM2,ACAN,ACAP2,ACHE,ADAMTS7,ADAMTSL1,AFF1,AGL,AGTPBP1,AHI1,AKAP3,AMOTL1,ANKRD12,ANKRD26,ANKRD32,AP1G2,APC,ARHGAP21,ARHGAP26,ARHGEF2,ARID4B,ASPM,ATAD3A,ATRX,BAZ2B,BCL11A,BLM,BRCA1,BRD3,C19orf26,C3,CACNA1D,CAMTA1,CAND1,CANT1,CASP7,CBX6,CC2D1A,CCDC141,CCDC38,CCDC88B,CCRN4L,CCT2,CDH23,CDK5RAP2,CENPC,CENPE,CENPT,CEP135,CEP164,CEP170B,CEP350,CEP85L,CFAP44,CHGB,CHMP7,CHTF18,CIC,CIITA,CKAP5,CKMT…
GO:0043229	intracellular organelle	369	12193	7.37e-09	ENSP00000007414,ENSP00000161863,ENSP00000171887,ENSP00000200453,ENSP00000202556,ENSP00000215862,ENSP00000219689,ENSP00000222145,ENSP00000223366,ENSP00000225964,ENSP00000228850,ENSP00000245503,ENSP00000245907,ENSP00000247191,ENSP00000251047,ENSP00000251472,ENSP00000251507,ENSP00000251527,ENSP00000251691,ENSP00000252674,ENSP00000252804,ENSP00000254029,ENSP00000254108,ENSP00000255882,ENSP00000256707…	ABCF1,ABLIM2,ACAN,ACAP2,ACHE,ADAMTS7,ADAMTSL1,AFF1,AGL,AGTPBP1,AHI1,AKAP3,AMOTL1,ANKRD12,ANKRD26,ANKRD32,AP1G2,APC,ARHGAP21,ARHGAP26,ARHGEF2,ARID4B,ASPM,ATAD3A,ATRX,BAZ2B,BCL11A,BLM,BRCA1,BRD3,C19orf26,C3,CACNA1D,CAMTA1,CAND1,CANT1,CASP7,CBX6,CC2D1A,CCDC141,CCDC38,CCDC88B,CCRN4L,CCT2,CDK5RAP2,CENPC,CENPE,CENPT,CEP135,CEP164,CEP170B,CEP350,CEP85L,CHGB,CHMP7,CHTF18,CIC,CIITA,CKAP5,CKMT1A,CKMT1B,CLA…
GO:0044430	cytoskeletal part	82	1547	1.08e-08	ENSP00000245503,ENSP00000247191,ENSP00000257287,ENSP00000257430,ENSP00000259335,ENSP00000261839,ENSP00000262102,ENSP00000262113,ENSP00000263710,ENSP00000265104,ENSP00000265140,ENSP00000265148,ENSP00000266070,ENSP00000267163,ENSP00000270176,ENSP00000278935,ENSP00000287380,ENSP00000288235,ENSP00000296859,ENSP00000297814,ENSP00000299300,ENSP00000309714,ENSP00000310219,ENSP00000311273,ENSP00000312554…	AHI1,ANKRD26,ANKRD32,APC,ARHGEF2,ASPM,BRCA1,CC2D1A,CCDC141,CCDC38,CCDC88B,CCT2,CDK5RAP2,CENPE,CEP135,CEP164,CEP170B,CEP350,CEP85L,CKAP5,CLASP1,CNTROB,CROCC,DCDC1,DDX11,DIDO1,DISC1,DLGAP5,DNAH11,DNAH12,DNAH2,DNAH5,DNAH7,FLG,FLNA,FRY,GAS2L3,HSPA6,IFT140,KIAA0368,KIF16B,KIF24,KIF27,LRIF1,LRRC16A,LRRC48,MACF1,MAP2,MAP4,MAP7D1,MICAL3,MTUS1,MYH11,MYH2,MYH3,MYO10,MYO1E,MYO1H,MYO5A,MYO5C,MYO6,MYO9A,MYOM2…
GO:0015630	microtubule cytoskeleton	65	1118	3.33e-08	ENSP00000247191,ENSP00000257287,ENSP00000257430,ENSP00000259335,ENSP00000262102,ENSP00000263710,ENSP00000265104,ENSP00000265140,ENSP00000265148,ENSP00000266070,ENSP00000267163,ENSP00000270176,ENSP00000278935,ENSP00000287380,ENSP00000296859,ENSP00000297814,ENSP00000299300,ENSP00000310219,ENSP00000311273,ENSP00000312554,ENSP00000313601,ENSP00000317144,ENSP00000323421,ENSP00000326550,ENSP00000343818…	AHI1,ANKRD26,ANKRD32,APC,ARHGEF2,ASPM,BRCA1,CC2D1A,CCDC141,CCDC38,CCDC88B,CCT2,CDK5RAP2,CENPE,CEP135,CEP164,CEP170B,CEP350,CEP85L,CKAP5,CLASP1,CNTROB,CROCC,DCDC1,DDX11,DIDO1,DISC1,DLGAP5,DNAH11,DNAH12,DNAH2,DNAH5,DNAH7,FRY,GAS2L3,HSPA6,IFT140,KIAA0368,KIF16B,KIF24,KIF27,LRIF1,MACF1,MAP2,MAP4,MAP7D1,MAST2,MICAL3,MTUS1,MYO5A,OBSL1,PIBF1,PKP4,RABGAP1,RAPGEF6,RB1,RGPD4,SAA1,SCYL1,SMC1A,SMEK1,TACC3,TB…
GO:0005737	cytoplasm	339	11238	7.55e-07	ENSP00000007414,ENSP00000161863,ENSP00000171887,ENSP00000200453,ENSP00000202556,ENSP00000215862,ENSP00000222145,ENSP00000223366,ENSP00000225964,ENSP00000228850,ENSP00000241051,ENSP00000245503,ENSP00000245907,ENSP00000247191,ENSP00000249044,ENSP00000249344,ENSP00000251047,ENSP00000251472,ENSP00000251507,ENSP00000251527,ENSP00000251691,ENSP00000252674,ENSP00000252804,ENSP00000254029,ENSP00000254108…	AARS,ABCF1,ABLIM2,ACAN,ACAP2,ACHE,ADAMTS7,ADAMTSL1,ADCY9,AGL,AGTPBP1,AHI1,AKAP3,AMOTL1,ANKRD12,ANKRD32,AP1G2,APC,APOL5,ARHGAP21,ARHGAP26,ARHGEF1,ARHGEF2,ARHGEF40,ARID4B,ASPM,ATAD3A,BCL11A,BICC1,BLM,BRCA1,C19orf26,C3,CACNA1D,CAMTA1,CAND1,CANT1,CASP7,CC2D1A,CCDC141,CCDC38,CCDC88B,CCRN4L,CCT2,CDK5RAP2,CENPC,CENPE,CENPT,CEP135,CEP164,CEP170B,CEP350,CEP85L,CHGB,CHMP7,CHTF18,CKAP5,CKMT1A,CKMT1B,CLASP1,…
GO:0044422	organelle part	288	9111	7.55e-07	ENSP00000007414,ENSP00000200453,ENSP00000202556,ENSP00000222145,ENSP00000223366,ENSP00000225964,ENSP00000228850,ENSP00000245503,ENSP00000245907,ENSP00000247191,ENSP00000251047,ENSP00000251527,ENSP00000251691,ENSP00000252674,ENSP00000254029,ENSP00000254108,ENSP00000255882,ENSP00000257177,ENSP00000257287,ENSP00000257430,ENSP00000259335,ENSP00000259808,ENSP00000261381,ENSP00000261517,ENSP00000261839…	ABCF1,ACAN,ACAP2,ADAMTS7,ADAMTSL1,AFF1,AGL,AGTPBP1,AHI1,AKAP3,ANKRD12,ANKRD26,ANKRD32,AP1G2,APC,ARHGAP21,ARHGEF2,ARID4B,ASPM,ATAD3A,ATRX,BCL11A,BLM,BRCA1,C19orf26,C3,CACNA1D,CAMTA1,CAND1,CANT1,CASP7,CBX6,CC2D1A,CCDC141,CCDC38,CCDC88B,CCRN4L,CCT2,CDH23,CDK5RAP2,CENPC,CENPE,CENPT,CEP135,CEP164,CEP170B,CEP350,CEP85L,CHGB,CHMP7,CHTF18,CIC,CIITA,CKAP5,CKMT1A,CKMT1B,CLASP1,CMYA5,CNTROB,COL16A1,COL1A1,C…
GO:0044464	cell part	445	16244	7.55e-07	ENSP00000007414,ENSP00000161863,ENSP00000171887,ENSP00000200453,ENSP00000202556,ENSP00000215862,ENSP00000219689,ENSP00000222145,ENSP00000223366,ENSP00000225964,ENSP00000228850,ENSP00000236877,ENSP00000241051,ENSP00000245503,ENSP00000245907,ENSP00000247191,ENSP00000249044,ENSP00000249344,ENSP00000251047,ENSP00000251472,ENSP00000251507,ENSP00000251527,ENSP00000251691,ENSP00000252674,ENSP00000252804…	AARS,ABCF1,ABLIM2,ACAN,ACAP2,ACHE,ADAMTS7,ADAMTSL1,ADCY9,AFF1,AGL,AGTPBP1,AHI1,AKAP3,AMOTL1,ANKRD12,ANKRD26,ANKRD32,AP1G2,APC,APOL5,ARHGAP21,ARHGAP26,ARHGEF1,ARHGEF2,ARHGEF40,ARID4B,ASPM,ATAD3A,ATP4A,ATRX,BAZ2B,BCL11A,BICC1,BLM,BRCA1,BRD3,C19orf26,C3,CACNA1D,CACNA1E,CACNA1I,CACNB2,CAMTA1,CAND1,CANT1,CASP7,CBX6,CC2D1A,CCDC141,CCDC38,CCDC88B,CCRN4L,CCT2,CDH23,CDK5RAP2,CENPC,CENPE,CENPT,CEP135,CEP16…
GO:0016459	myosin complex	13	69	3.91e-06	ENSP00000245503,ENSP00000261839,ENSP00000262113,ENSP00000288235,ENSP00000348349,ENSP00000358994,ENSP00000363557,ENSP00000379616,ENSP00000382177,ENSP00000385636,ENSP00000421280,ENSP00000439182,ENSP00000464317	MYH11,MYH2,MYH3,MYO10,MYO1E,MYO1H,MYO5A,MYO5C,MYO6,MYO9A,MYOM2,MYOM3,OBSL1
GO:0099512	supramolecular fiber	50	873	3.91e-06	ENSP00000225964,ENSP00000245503,ENSP00000251047,ENSP00000257430,ENSP00000262102,ENSP00000262113,ENSP00000263710,ENSP00000265104,ENSP00000265148,ENSP00000288139,ENSP00000295550,ENSP00000297814,ENSP00000299300,ENSP00000303540,ENSP00000311273,ENSP00000312554,ENSP00000325527,ENSP00000331983,ENSP00000343818,ENSP00000346534,ENSP00000347719,ENSP00000349259,ENSP00000350170,ENSP00000350719,ENSP00000353375…	APC,ARHGEF2,ASPM,CACNA1D,CCT2,CDK5RAP2,CENPE,CEP170B,CLASP1,CMYA5,COL1A1,COL6A1,COL6A3,DCDC1,DISC1,DMD,DNAH11,DNAH12,DNAH2,DNAH5,DNAH7,FBN1,FLG,FLNA,FXR1,GAS2L3,KIF16B,KIF24,KIF27,LMAN1,LRRC16A,MACF1,MAP2,MAP4,MTUS1,MYH11,MYH2,MYH3,MYO5A,MYO6,MYOM2,MYOM3,OBSL1,SAA1,SCN1A,SCN8A,SPTBN1,SYNE2,TBCD,XIRP2
GO:0044446	intracellular organelle part	277	8882	6.31e-06	ENSP00000007414,ENSP00000200453,ENSP00000202556,ENSP00000222145,ENSP00000223366,ENSP00000225964,ENSP00000245503,ENSP00000245907,ENSP00000247191,ENSP00000251047,ENSP00000251527,ENSP00000251691,ENSP00000252674,ENSP00000254029,ENSP00000254108,ENSP00000255882,ENSP00000257177,ENSP00000257287,ENSP00000257430,ENSP00000259335,ENSP00000259808,ENSP00000261381,ENSP00000261517,ENSP00000261839,ENSP00000262101…	ABCF1,ACAN,ACAP2,ADAMTS7,ADAMTSL1,AFF1,AGL,AGTPBP1,AHI1,ANKRD12,ANKRD26,ANKRD32,AP1G2,APC,ARHGAP21,ARHGEF2,ARID4B,ASPM,ATAD3A,ATRX,BCL11A,BLM,BRCA1,C19orf26,C3,CAMTA1,CAND1,CANT1,CASP7,CBX6,CC2D1A,CCDC141,CCDC38,CCDC88B,CCRN4L,CCT2,CDK5RAP2,CENPC,CENPE,CENPT,CEP135,CEP164,CEP170B,CEP350,CEP85L,CHGB,CHMP7,CHTF18,CIC,CIITA,CKAP5,CKMT1A,CKMT1B,CLASP1,CNTROB,COL16A1,COL1A1,COL24A1,COL6A1,COL6A3,COX16…
GO:0005815	microtubule organizing center	40	683	3.84e-05	ENSP00000247191,ENSP00000257287,ENSP00000257430,ENSP00000259335,ENSP00000262102,ENSP00000263710,ENSP00000265140,ENSP00000270176,ENSP00000278935,ENSP00000287380,ENSP00000296859,ENSP00000310219,ENSP00000313601,ENSP00000317144,ENSP00000326550,ENSP00000343818,ENSP00000345470,ENSP00000347719,ENSP00000349238,ENSP00000355593,ENSP00000356379,ENSP00000356579,ENSP00000356774,ENSP00000357474,ENSP00000358778…	AHI1,ANKRD26,ANKRD32,APC,ASPM,BRCA1,CC2D1A,CCDC141,CCDC38,CCDC88B,CDK5RAP2,CEP135,CEP164,CEP350,CEP85L,CKAP5,CLASP1,CNTROB,CROCC,DDX11,DISC1,DLGAP5,FRY,HSPA6,IFT140,KIAA0368,KIF24,LRIF1,MTUS1,OBSL1,PIBF1,RABGAP1,RAPGEF6,RGPD4,SCYL1,SMEK1,TACC3,TBC1D31,TBCD,WDR62
GO:0044444	cytoplasmic part	284	9377	6.19e-05	ENSP00000007414,ENSP00000161863,ENSP00000200453,ENSP00000202556,ENSP00000215862,ENSP00000222145,ENSP00000223366,ENSP00000225964,ENSP00000228850,ENSP00000241051,ENSP00000245503,ENSP00000245907,ENSP00000247191,ENSP00000249344,ENSP00000251047,ENSP00000251507,ENSP00000251527,ENSP00000251691,ENSP00000252674,ENSP00000252804,ENSP00000254029,ENSP00000254108,ENSP00000255882,ENSP00000256707,ENSP00000257177…	AARS,ABCF1,ACAN,ACAP2,ACHE,ADAMTS7,ADAMTSL1,ADCY9,AGL,AGTPBP1,AHI1,AKAP3,AMOTL1,ANKRD12,AP1G2,APC,ARHGAP21,ARHGAP26,ARHGEF1,ARHGEF2,ATAD3A,BLM,BRCA1,C19orf26,C3,CACNA1D,CAMTA1,CAND1,CANT1,CASP7,CC2D1A,CCDC88B,CCRN4L,CCT2,CDK5RAP2,CENPC,CENPE,CENPT,CEP135,CEP164,CEP350,CHGB,CHMP7,CHTF18,CKAP5,CKMT1A,CKMT1B,CLASP1,CMYA5,CNOT10,CNTROB,COL16A1,COL1A1,COL24A1,COL6A1,COL6A3,COX16,CPS1,CROCC,CTNNA1,CUL4…
GO:0031981	nuclear lumen	142	4030	0.00015	ENSP00000202556,ENSP00000223366,ENSP00000252674,ENSP00000254108,ENSP00000257177,ENSP00000257430,ENSP00000262102,ENSP00000262126,ENSP00000262315,ENSP00000262519,ENSP00000262715,ENSP00000263073,ENSP00000263857,ENSP00000264183,ENSP00000264515,ENSP00000265148,ENSP00000265963,ENSP00000266269,ENSP00000267163,ENSP00000268638,ENSP00000273853,ENSP00000278935,ENSP00000279392,ENSP00000280614,ENSP00000282030…	ABCF1,AFF1,AGTPBP1,ANKRD12,APC,ARID4B,ATRX,BCL11A,BLM,BRCA1,CAMTA1,CAND1,CASP7,CBX6,CC2D1A,CCRN4L,CENPC,CENPE,CENPT,CEP164,CHTF18,CIC,CIITA,CKAP5,CPS1,CUL4B,CWC15,DCAF11,DDX11,DDX31,DDX42,DHX37,DNA2,DNLZ,EID2,EP400,EYA2,FAM208B,FAN1,FANCI,FLNA,FUS,FXR1,GCK,GTF2H1,HEATR1,HFM1,HIRIP3,HIVEP2,HNRNPR,IGF2BP1,IKBKE,INTS1,INTS3,IRF8,JMJD2C,KAZN,KMT2A,LONP1,LRIF1,LRRC16A,LSM4,MAGI1,MAP2,MAP3K2,MDN1,MED1,…
GO:0005829	cytosol	167	4958	0.00019	ENSP00000007414,ENSP00000200453,ENSP00000202556,ENSP00000215862,ENSP00000223366,ENSP00000241051,ENSP00000245503,ENSP00000247191,ENSP00000249344,ENSP00000252674,ENSP00000254029,ENSP00000255882,ENSP00000256707,ENSP00000257177,ENSP00000257287,ENSP00000257430,ENSP00000259808,ENSP00000261517,ENSP00000261772,ENSP00000262126,ENSP00000262315,ENSP00000262483,ENSP00000262719,ENSP00000263073,ENSP00000263710…	AARS,ABCF1,ADCY9,AGL,AGTPBP1,AHI1,AMOTL1,ANKRD12,APC,ARHGAP21,ARHGAP26,ARHGEF1,ARHGEF2,BLM,CAMTA1,CAND1,CASP7,CC2D1A,CCT2,CDK5RAP2,CENPC,CENPE,CENPT,CEP135,CEP164,CHMP7,CHTF18,CKAP5,CLASP1,CNOT10,CNTROB,CROCC,CTNNA1,CUL4B,DDX42,DENND4B,DENND5B,DEPDC7,DLGAP5,DMD,DNAH7,DOCK5,DOCK6,EPS15L1,EVPL,EYA2,FAM208B,FAN1,FANCI,FBXO41,FEZF1,FHL1,FLG,FLNA,FMNL1,FMNL2,FXR1,GCK,GCN1L1,GIGYF2,GIT1,GRB14,HSPA6,IGF…
GO:0005874	microtubule	26	385	0.00026	ENSP00000257430,ENSP00000262102,ENSP00000263710,ENSP00000265104,ENSP00000265148,ENSP00000297814,ENSP00000299300,ENSP00000311273,ENSP00000312554,ENSP00000343818,ENSP00000347719,ENSP00000353375,ENSP00000353508,ENSP00000354573,ENSP00000354837,ENSP00000355593,ENSP00000356379,ENSP00000368464,ENSP00000382177,ENSP00000384164,ENSP00000384906,ENSP00000385936,ENSP00000404151,ENSP00000448955,ENSP00000458355…	APC,ARHGEF2,ASPM,CCT2,CDK5RAP2,CENPE,CEP170B,CLASP1,DCDC1,DISC1,DNAH11,DNAH12,DNAH2,DNAH5,DNAH7,GAS2L3,KIF16B,KIF24,KIF27,MACF1,MAP2,MAP4,MTUS1,MYO5A,SAA1,TBCD
GO:0005813	centrosome	29	468	0.00033	ENSP00000247191,ENSP00000257287,ENSP00000257430,ENSP00000259335,ENSP00000263710,ENSP00000265140,ENSP00000278935,ENSP00000287380,ENSP00000296859,ENSP00000317144,ENSP00000343818,ENSP00000345470,ENSP00000347719,ENSP00000349238,ENSP00000355593,ENSP00000356379,ENSP00000356579,ENSP00000356774,ENSP00000357474,ENSP00000362751,ENSP00000364691,ENSP00000365255,ENSP00000369614,ENSP00000384792,ENSP00000385636…	AHI1,ANKRD26,ANKRD32,APC,ASPM,CCDC38,CCDC88B,CDK5RAP2,CEP135,CEP164,CEP350,CEP85L,CKAP5,CLASP1,CNTROB,CROCC,DDX11,DISC1,DLGAP5,IFT140,KIAA0368,OBSL1,PIBF1,RABGAP1,RAPGEF6,RGPD4,TBC1D31,TBCD,WDR62
GO:0032991	protein-containing complex	161	4792	0.00033	ENSP00000161863,ENSP00000200453,ENSP00000225964,ENSP00000245503,ENSP00000245907,ENSP00000252674,ENSP00000254108,ENSP00000256707,ENSP00000257430,ENSP00000259335,ENSP00000259808,ENSP00000261839,ENSP00000262101,ENSP00000262113,ENSP00000262315,ENSP00000262519,ENSP00000262715,ENSP00000263073,ENSP00000263269,ENSP00000263710,ENSP00000263816,ENSP00000263857,ENSP00000264151,ENSP00000264431,ENSP00000264515…	ABCF1,ADCY9,AFF1,AGL,AHI1,ANKRD32,AP1G2,APC,ARHGEF2,BRCA1,C3,CACNA1D,CACNA1E,CACNA1I,CACNB2,CAND1,CBX6,CCRN4L,CCT2,CENPC,CENPE,CENPT,CEP164,CHMP7,CHTF18,CIC,CKAP5,CLASP1,CNOT10,COL16A1,COL1A1,COL24A1,COL6A1,COL6A3,COL6A5,CPS1,CTNNA1,CUL4B,CWC15,DCAF11,DMD,DMXL1,DNAH11,DNAH12,DNAH2,DNAH5,DNAH7,EP400,EPS15L1,FLNA,FN1,FUS,FXR1,FZD8,GCN1L1,GIGYF2,GLDN,GPR101,GPR98,GRIN2A,GRIN2B,GRIN2D,GTF2H1,HEATR1,H…
GO:0070013	intracellular organelle lumen	171	5162	0.00033	ENSP00000202556,ENSP00000223366,ENSP00000225964,ENSP00000245907,ENSP00000252674,ENSP00000254108,ENSP00000257177,ENSP00000257430,ENSP00000262102,ENSP00000262126,ENSP00000262315,ENSP00000262519,ENSP00000262715,ENSP00000263073,ENSP00000263816,ENSP00000263857,ENSP00000264183,ENSP00000264515,ENSP00000265148,ENSP00000265594,ENSP00000265963,ENSP00000266269,ENSP00000267163,ENSP00000268638,ENSP00000273853…	ABCF1,ACAN,ADAMTS7,ADAMTSL1,AFF1,AGL,AGTPBP1,ANKRD12,APC,ARID4B,ATAD3A,ATRX,BCL11A,BLM,BRCA1,C3,CAMTA1,CAND1,CANT1,CASP7,CBX6,CC2D1A,CCRN4L,CCT2,CENPC,CENPE,CENPT,CEP164,CHGB,CHTF18,CIC,CIITA,CKAP5,COL16A1,COL1A1,COL24A1,COL6A1,COL6A3,CPS1,CUL4B,CWC15,DCAF11,DDX11,DDX31,DDX42,DHX37,DNA2,DNLZ,EID2,EP400,EYA2,FAM208B,FAN1,FANCI,FBN1,FLNA,FN1,FUS,FXR1,GCK,GTF2H1,GTPBP2,HEATR1,HFM1,HIRIP3,HIVEP2,HNRN…
GO:0044428	nuclear part	147	4359	0.00068	ENSP00000202556,ENSP00000223366,ENSP00000252674,ENSP00000254108,ENSP00000257177,ENSP00000257430,ENSP00000262102,ENSP00000262126,ENSP00000262315,ENSP00000262519,ENSP00000262715,ENSP00000262719,ENSP00000263073,ENSP00000263857,ENSP00000264183,ENSP00000264515,ENSP00000265140,ENSP00000265148,ENSP00000265963,ENSP00000266269,ENSP00000267163,ENSP00000268638,ENSP00000273853,ENSP00000278935,ENSP00000279392…	ABCF1,AFF1,AGTPBP1,ANKRD12,ANKRD32,APC,ARID4B,ATRX,BCL11A,BLM,BRCA1,CAMTA1,CAND1,CASP7,CBX6,CC2D1A,CCRN4L,CENPC,CENPE,CENPT,CEP164,CHMP7,CHTF18,CIC,CIITA,CKAP5,CPS1,CUL4B,CWC15,DCAF11,DDX11,DDX31,DDX42,DHX37,DNA2,DNLZ,EID2,EP400,EYA2,FAM208B,FAN1,FANCI,FLNA,FUS,FXR1,GCK,GTF2H1,HEATR1,HFM1,HIRIP3,HIVEP2,HNRNPR,IGF2BP1,IKBKE,INTS1,INTS3,IRF8,JMJD2C,KAZN,KMT2A,LONP1,LRIF1,LRRC16A,LSM4,MAGI1,MAP2,MAP…
GO:0042995	cell projection	78	1969	0.00073	ENSP00000228850,ENSP00000236877,ENSP00000254108,ENSP00000257430,ENSP00000262483,ENSP00000263816,ENSP00000264431,ENSP00000265104,ENSP00000278935,ENSP00000290341,ENSP00000290401,ENSP00000294016,ENSP00000295888,ENSP00000297814,ENSP00000303540,ENSP00000304669,ENSP00000309714,ENSP00000311273,ENSP00000312554,ENSP00000325677,ENSP00000329219,ENSP00000331983,ENSP00000335196,ENSP00000346534,ENSP00000349259…	ADCY9,AHI1,AKAP3,AMOTL1,APC,ARHGEF2,C19orf26,CDH23,CEP164,CEP350,CFAP44,CROCC,CTNNA1,DCDC2C,DISC1,DMD,DNAH11,DNAH12,DNAH2,DNAH5,DNAH7,FAT1,FLNA,FMNL1,FUS,FXR1,GIGYF2,GLDN,GPHN,GPR124,GPR98,GRIN2A,GRIN2B,HNRNPR,IFT140,IGF2BP1,KANK1,KIF27,KSR1,LRP2,LRRC16A,LRRC48,LSM4,MACF1,MAGI1,MAP2,MAP4,MARK3,MICAL3,MOK,MPDZ,MYO10,MYO5A,MYO6,NCAM2,NPTN,OPA1,PITPNM3,PREX1,RAPGEF2,RELN,RNF40,SACS,SCN1A,SCN8A,SCN9A…
GO:0044449	contractile fiber part	17	212	0.00099	ENSP00000245503,ENSP00000251047,ENSP00000262113,ENSP00000288139,ENSP00000303540,ENSP00000346534,ENSP00000349259,ENSP00000350170,ENSP00000350719,ENSP00000354923,ENSP00000358866,ENSP00000363557,ENSP00000379616,ENSP00000385636,ENSP00000386840,ENSP00000394770,ENSP00000464317	CACNA1D,CMYA5,DMD,FLNA,FXR1,LMAN1,MYH11,MYH2,MYH3,MYOM2,MYOM3,OBSL1,SCN1A,SCN8A,SPTBN1,SYNE2,XIRP2
GO:0015629	actin cytoskeleton	26	432	0.0012	ENSP00000245503,ENSP00000261839,ENSP00000262113,ENSP00000288235,ENSP00000304669,ENSP00000309714,ENSP00000331983,ENSP00000344562,ENSP00000348349,ENSP00000349259,ENSP00000354837,ENSP00000358866,ENSP00000358994,ENSP00000363557,ENSP00000364691,ENSP00000379616,ENSP00000379709,ENSP00000382177,ENSP00000385636,ENSP00000393511,ENSP00000421280,ENSP00000432568,ENSP00000439182,ENSP00000440847,ENSP00000448955…	ABLIM2,ARHGAP21,ARHGEF2,CORO6,CROCC,CTNNA1,FLNA,GAS2L3,LRRC16A,MYH11,MYH2,MYH3,MYO10,MYO1E,MYO1H,MYO5A,MYO5C,MYO6,MYO9A,MYOM2,MYOM3,OBSL1,SH3PXD2B,SPTBN1,SPTBN2,ZNF185
GO:0005819	spindle	21	322	0.0021	ENSP00000247191,ENSP00000262102,ENSP00000263710,ENSP00000265148,ENSP00000266070,ENSP00000267163,ENSP00000323421,ENSP00000326550,ENSP00000343818,ENSP00000353375,ENSP00000354837,ENSP00000356379,ENSP00000356579,ENSP00000362244,ENSP00000374409,ENSP00000384792,ENSP00000385936,ENSP00000416015,ENSP00000432768,ENSP00000440402,ENSP00000445043	ARHGEF2,ASPM,CDK5RAP2,CENPE,CEP350,CKAP5,CLASP1,DCDC1,DDX11,DIDO1,DLGAP5,FRY,MAP4,MAP7D1,MICAL3,MTUS1,PKP4,RB1,SMC1A,TACC3,WDR62
GO:0005859	muscle myosin complex	6	27	0.0024	ENSP00000245503,ENSP00000262113,ENSP00000363557,ENSP00000379616,ENSP00000385636,ENSP00000464317	MYH11,MYH2,MYH3,MYOM2,MYOM3,OBSL1
GO:0030016	myofibril	16	216	0.0034	ENSP00000245503,ENSP00000251047,ENSP00000262113,ENSP00000288139,ENSP00000303540,ENSP00000346534,ENSP00000349259,ENSP00000350170,ENSP00000350719,ENSP00000354923,ENSP00000358866,ENSP00000363557,ENSP00000385636,ENSP00000386840,ENSP00000394770,ENSP00000464317	CACNA1D,CMYA5,DMD,FLNA,FXR1,LMAN1,MYH2,MYH3,MYOM2,MYOM3,OBSL1,SCN1A,SCN8A,SPTBN1,SYNE2,XIRP2
GO:0030017	sarcomere	15	195	0.0035	ENSP00000245503,ENSP00000251047,ENSP00000262113,ENSP00000288139,ENSP00000303540,ENSP00000346534,ENSP00000349259,ENSP00000350719,ENSP00000354923,ENSP00000358866,ENSP00000363557,ENSP00000385636,ENSP00000386840,ENSP00000394770,ENSP00000464317	CACNA1D,CMYA5,DMD,FLNA,LMAN1,MYH2,MYH3,MYOM2,MYOM3,OBSL1,SCN1A,SCN8A,SPTBN1,SYNE2,XIRP2
GO:0099568	cytoplasmic region	23	402	0.0052	ENSP00000245503,ENSP00000263710,ENSP00000265104,ENSP00000311273,ENSP00000327251,ENSP00000329219,ENSP00000349259,ENSP00000353375,ENSP00000353508,ENSP00000354681,ENSP00000358866,ENSP00000358994,ENSP00000370744,ENSP00000382140,ENSP00000387266,ENSP00000405405,ENSP00000406012,ENSP00000416015,ENSP00000421280,ENSP00000432568,ENSP00000445043,ENSP00000458355,ENSP00000475939	CLASP1,DNAH11,DNAH2,DNAH5,DNAH7,FLNA,FMNL1,FRY,IFT140,ITPR2,LRRC48,MAP2,MAP4,MICAL3,MYH2,MYO10,MYO6,NOS2,OPA1,PHLDB2,SPIRE1,SPTBN1,SPTBN2
GO:0120025	plasma membrane bounded cell projection	71	1900	0.0069	ENSP00000228850,ENSP00000236877,ENSP00000254108,ENSP00000257430,ENSP00000263816,ENSP00000264431,ENSP00000265104,ENSP00000278935,ENSP00000290341,ENSP00000290401,ENSP00000294016,ENSP00000295888,ENSP00000297814,ENSP00000303540,ENSP00000304669,ENSP00000311273,ENSP00000312554,ENSP00000325677,ENSP00000329219,ENSP00000331983,ENSP00000335196,ENSP00000346534,ENSP00000349259,ENSP00000350170,ENSP00000350719…	ADCY9,AHI1,AKAP3,AMOTL1,APC,ARHGEF2,C19orf26,CDH23,CEP164,CFAP44,CROCC,CTNNA1,DCDC2C,DISC1,DMD,DNAH11,DNAH12,DNAH2,DNAH5,DNAH7,FAT1,FLNA,FMNL1,FUS,FXR1,GIGYF2,GLDN,GPHN,GPR124,GPR98,GRIN2A,GRIN2B,HNRNPR,IFT140,IGF2BP1,KANK1,KIF27,KSR1,LRP2,LRRC16A,LRRC48,LSM4,MACF1,MAP2,MAP4,MARK3,MOK,MPDZ,MYO10,MYO5A,MYO6,NCAM2,NPTN,OPA1,PREX1,RAPGEF2,RELN,RNF40,SACS,SCN1A,SCN8A,SLC8A2,SPATA13,SPTBN1,SYNE2,TENM3…
GO:0005634	nucleus	207	6892	0.0071	ENSP00000202556,ENSP00000215862,ENSP00000219689,ENSP00000223366,ENSP00000247191,ENSP00000251507,ENSP00000252674,ENSP00000254108,ENSP00000257177,ENSP00000257430,ENSP00000259335,ENSP00000261441,ENSP00000262102,ENSP00000262126,ENSP00000262315,ENSP00000262519,ENSP00000262715,ENSP00000262719,ENSP00000263073,ENSP00000263857,ENSP00000264183,ENSP00000264498,ENSP00000264515,ENSP00000265140,ENSP00000265148…	ABCF1,ACHE,AFF1,AGL,AGTPBP1,ANKRD12,ANKRD32,APC,ARID4B,ASPM,ATRX,BAZ2B,BCL11A,BLM,BRCA1,BRD3,CAMTA1,CAND1,CASP7,CBX6,CC2D1A,CCRN4L,CENPC,CENPE,CENPT,CEP164,CEP350,CHMP7,CHTF18,CIC,CIITA,CKAP5,CNOT10,CPS1,CUL4B,CWC15,DCAF11,DDX11,DDX31,DDX42,DENND4B,DHX37,DIDO1,DIP2A,DLGAP5,DMD,DNA2,DNLZ,EID2,EP400,EPS15L1,EXD3,EYA2,FAM120B,FAM178A,FAM208B,FAN1,FANCI,FAT1,FEZF1,FGF2,FHL1,FLNA,FUS,FXR1,GCK,GTF2H1,H…
GO:0005654	nucleoplasm	115	3446	0.0071	ENSP00000202556,ENSP00000223366,ENSP00000252674,ENSP00000254108,ENSP00000257430,ENSP00000262126,ENSP00000262315,ENSP00000262519,ENSP00000263857,ENSP00000264183,ENSP00000264515,ENSP00000265148,ENSP00000265963,ENSP00000266269,ENSP00000267163,ENSP00000268638,ENSP00000273853,ENSP00000278935,ENSP00000280614,ENSP00000282030,ENSP00000286398,ENSP00000290208,ENSP00000290341,ENSP00000294008,ENSP00000295888…	ABCF1,AFF1,ANKRD12,APC,ARID4B,ATRX,BCL11A,BLM,BRCA1,CAND1,CASP7,CBX6,CCRN4L,CENPC,CENPE,CENPT,CEP164,CHTF18,CIC,CIITA,CUL4B,CWC15,DCAF11,DDX11,DDX42,DHX37,DNA2,DNLZ,EID2,EP400,EYA2,FAM208B,FAN1,FANCI,FUS,GCK,GTF2H1,HEATR1,HIVEP2,HNRNPR,IGF2BP1,IKBKE,INTS1,INTS3,IRF8,JMJD2C,KAZN,KMT2A,LONP1,LRRC16A,LSM4,MAGI1,MAP3K2,MDN1,MED1,MICAL3,MIS18BP1,MLLT1,MRPL10,MYO6,NCAM2,NEDD4L,NFAT5,OPA1,PATZ1,POLR1A,P…
GO:0005875	microtubule associated complex	12	144	0.0071	ENSP00000265104,ENSP00000265148,ENSP00000297814,ENSP00000311273,ENSP00000312554,ENSP00000353375,ENSP00000353508,ENSP00000362751,ENSP00000368464,ENSP00000384164,ENSP00000458355,ENSP00000475939	CENPE,DNAH11,DNAH12,DNAH2,DNAH5,DNAH7,KIF16B,KIF24,KIF27,MAP2,MAP4,RABGAP1
GO:0043227	membrane-bounded organelle	315	11244	0.0071	ENSP00000007414,ENSP00000161863,ENSP00000200453,ENSP00000202556,ENSP00000215862,ENSP00000219689,ENSP00000222145,ENSP00000223366,ENSP00000225964,ENSP00000228850,ENSP00000245503,ENSP00000245907,ENSP00000247191,ENSP00000251047,ENSP00000251507,ENSP00000251527,ENSP00000251691,ENSP00000252674,ENSP00000252804,ENSP00000254029,ENSP00000254108,ENSP00000255882,ENSP00000256707,ENSP00000257177,ENSP00000257430…	ABCF1,ACAN,ACAP2,ACHE,ADAMTS7,ADAMTSL1,AFF1,AGL,AGTPBP1,AKAP3,AMOTL1,ANKRD12,ANKRD32,AP1G2,APC,ARHGAP21,ARHGEF2,ARID4B,ASPM,ATAD3A,ATRX,BAZ2B,BCL11A,BLM,BRCA1,BRD3,C19orf26,C3,CAMTA1,CAND1,CANT1,CASP7,CBX6,CC2D1A,CCDC88B,CCRN4L,CCT2,CDK5RAP2,CENPC,CENPE,CENPT,CEP164,CEP350,CHGB,CHMP7,CHTF18,CIC,CIITA,CKAP5,CKMT1A,CKMT1B,CLASP1,CLIP4,CNOT10,COL16A1,COL1A1,COL24A1,COL6A1,COL6A3,COX16,CPS1,CTNNA1,CU…
GO:0044450	microtubule organizing center part	13	167	0.0071	ENSP00000257287,ENSP00000263710,ENSP00000278935,ENSP00000310219,ENSP00000317144,ENSP00000343818,ENSP00000356579,ENSP00000356774,ENSP00000364691,ENSP00000368464,ENSP00000369614,ENSP00000384792,ENSP00000418960	AHI1,BRCA1,CDK5RAP2,CEP135,CEP164,CEP350,CLASP1,CNTROB,CROCC,HSPA6,KIF24,PIBF1,WDR62
GO:0030054	cell junction	43	1006	0.0077	ENSP00000171887,ENSP00000245503,ENSP00000257430,ENSP00000263269,ENSP00000264431,ENSP00000274498,ENSP00000288135,ENSP00000288235,ENSP00000294008,ENSP00000301607,ENSP00000303211,ENSP00000303540,ENSP00000304604,ENSP00000304669,ENSP00000305288,ENSP00000309714,ENSP00000341957,ENSP00000343818,ENSP00000347719,ENSP00000350719,ENSP00000354837,ENSP00000354923,ENSP00000355593,ENSP00000356774,ENSP00000358866…	ACHE,AHI1,AMOTL1,APC,ARHGAP21,ARHGAP26,ARHGEF2,C19orf26,CDK5RAP2,CTNNA1,DISC1,DMD,EVPL,FAT1,FLNA,GIT1,GPHN,GRIN2A,GRIN2B,GRIN2D,KAZN,KIT,MAGI1,MAGI3,MPDZ,MYH2,MYO1E,NLGN2,OBSL1,PKP4,RAPGEF2,SCN1A,SDK2,SH3PXD2B,SLX4,SPTBN2,SYNE2,TBCD,TNS1,TP53BP2,UNC13A,XIRP2,ZNF185
GO:0001518	voltage-gated sodium channel complex	4	14	0.0116	ENSP00000283254,ENSP00000303540,ENSP00000346534,ENSP00000386306	SCN1A,SCN3A,SCN8A,SCN9A
GO:0030175	filopodium	9	96	0.0145	ENSP00000290341,ENSP00000350719,ENSP00000353508,ENSP00000354923,ENSP00000382177,ENSP00000398560,ENSP00000406229,ENSP00000406367,ENSP00000421280	DMD,FAT1,GPR124,IGF2BP1,MAP2,MYO10,MYO5A,SPATA13,SYNE2
GO:0043231	intracellular membrane-bounded organelle	291	10365	0.0147	ENSP00000007414,ENSP00000161863,ENSP00000200453,ENSP00000202556,ENSP00000215862,ENSP00000219689,ENSP00000222145,ENSP00000223366,ENSP00000225964,ENSP00000245503,ENSP00000245907,ENSP00000247191,ENSP00000251047,ENSP00000251507,ENSP00000251527,ENSP00000252674,ENSP00000252804,ENSP00000254029,ENSP00000254108,ENSP00000257177,ENSP00000257430,ENSP00000258991,ENSP00000259335,ENSP00000259808,ENSP00000261381…	ABCF1,ACAN,ACHE,ADAMTS7,ADAMTSL1,AFF1,AGL,AGTPBP1,ANKRD12,ANKRD32,AP1G2,APC,ARHGAP21,ARHGEF2,ARID4B,ASPM,ATAD3A,ATRX,BAZ2B,BCL11A,BLM,BRCA1,BRD3,C3,CAMTA1,CAND1,CANT1,CASP7,CBX6,CC2D1A,CCDC88B,CCRN4L,CCT2,CDK5RAP2,CENPC,CENPE,CENPT,CEP164,CEP350,CHGB,CHMP7,CHTF18,CIC,CIITA,CKAP5,CKMT1A,CKMT1B,CLASP1,CLIP4,CNOT10,COL16A1,COL1A1,COL24A1,COL6A1,COL6A3,COX16,CPS1,CTNNA1,CUL4B,CWC15,CYB5R1,CYP11B2,DCA…
GO:0099513	polymeric cytoskeletal fiber	30	645	0.0147	ENSP00000257430,ENSP00000262102,ENSP00000263710,ENSP00000265104,ENSP00000265148,ENSP00000297814,ENSP00000299300,ENSP00000311273,ENSP00000312554,ENSP00000331983,ENSP00000343818,ENSP00000347719,ENSP00000353375,ENSP00000353508,ENSP00000354573,ENSP00000354837,ENSP00000355593,ENSP00000356379,ENSP00000357789,ENSP00000358866,ENSP00000358994,ENSP00000368464,ENSP00000382177,ENSP00000384164,ENSP00000384906…	APC,ARHGEF2,ASPM,CCT2,CDK5RAP2,CENPE,CEP170B,CLASP1,DCDC1,DISC1,DNAH11,DNAH12,DNAH2,DNAH5,DNAH7,FLG,FLNA,GAS2L3,KIF16B,KIF24,KIF27,LRRC16A,MACF1,MAP2,MAP4,MTUS1,MYO5A,MYO6,SAA1,TBCD
GO:0005730	nucleolus	39	926	0.0164	ENSP00000252674,ENSP00000257177,ENSP00000262102,ENSP00000263073,ENSP00000263857,ENSP00000264515,ENSP00000279392,ENSP00000286398,ENSP00000295888,ENSP00000300651,ENSP00000306522,ENSP00000311135,ENSP00000313601,ENSP00000318641,ENSP00000338512,ENSP00000347232,ENSP00000349259,ENSP00000350170,ENSP00000353508,ENSP00000354522,ENSP00000355541,ENSP00000358400,ENSP00000358866,ENSP00000359454,ENSP00000361232…	AGTPBP1,BLM,CAMTA1,CC2D1A,CKAP5,CPS1,DDX11,DDX31,DDX42,DHX37,FLNA,FXR1,HEATR1,HFM1,HIRIP3,INTS3,MAP2,MDN1,MED1,MLLT1,MTUS1,MYO10,NKRF,NOL10,PLEKHM1,POLR1A,POLR1B,RBBP5,RRP12,SDCBP2,SMC2,SMG6,SPTBN1,TCOF1,TOP1,TTC3,WDFY3,ZCCHC11,ZNF300
GO:0030018	Z disc	10	122	0.0184	ENSP00000262113,ENSP00000288139,ENSP00000303540,ENSP00000346534,ENSP00000350719,ENSP00000354923,ENSP00000358866,ENSP00000363557,ENSP00000385636,ENSP00000386840	CACNA1D,DMD,FLNA,MYOM2,MYOM3,OBSL1,SCN1A,SCN8A,SYNE2,XIRP2
GO:0031672	A band	6	45	0.0184	ENSP00000245503,ENSP00000262113,ENSP00000349259,ENSP00000363557,ENSP00000385636,ENSP00000394770	CMYA5,MYH2,MYOM2,MYOM3,OBSL1,SPTBN1
GO:0031430	M band	5	31	0.021	ENSP00000262113,ENSP00000349259,ENSP00000363557,ENSP00000385636,ENSP00000394770	CMYA5,MYOM2,MYOM3,OBSL1,SPTBN1
GO:0044427	chromosomal part	35	819	0.0213	ENSP00000257430,ENSP00000262315,ENSP00000262519,ENSP00000262715,ENSP00000263073,ENSP00000263710,ENSP00000265140,ENSP00000265148,ENSP00000267163,ENSP00000273853,ENSP00000286398,ENSP00000294008,ENSP00000300651,ENSP00000309790,ENSP00000319104,ENSP00000323421,ENSP00000325677,ENSP00000347232,ENSP00000349961,ENSP00000351185,ENSP00000351777,ENSP00000354522,ENSP00000358866,ENSP00000359292,ENSP00000362441…	ANKRD32,APC,ATRX,BLM,BRCA1,CBX6,CENPC,CENPE,CENPT,CHTF18,CKAP5,CLASP1,DDX11,DNA2,EP400,FAM178A,FLNA,JMJD2C,MED1,MIS18BP1,RARG,RB1,RNF40,SETD1A,SLX4,SMC1A,SMC2,SMC4,SMG6,SUPT6H,TEP1,TNRC18,TOP1,UHRF1,VCP
GO:0072686	mitotic spindle	8	87	0.0262	ENSP00000265148,ENSP00000323421,ENSP00000326550,ENSP00000343818,ENSP00000353375,ENSP00000356379,ENSP00000374409,ENSP00000385936	ASPM,CDK5RAP2,CENPE,DCDC1,MAP4,PKP4,SMC1A,TACC3
GO:0120038	plasma membrane bounded cell projection part	50	1316	0.0265	ENSP00000228850,ENSP00000236877,ENSP00000254108,ENSP00000257430,ENSP00000263816,ENSP00000265104,ENSP00000278935,ENSP00000290341,ENSP00000290401,ENSP00000294016,ENSP00000303540,ENSP00000311273,ENSP00000325677,ENSP00000346534,ENSP00000349259,ENSP00000350170,ENSP00000350719,ENSP00000353375,ENSP00000353508,ENSP00000354006,ENSP00000354573,ENSP00000354681,ENSP00000354837,ENSP00000354923,ENSP00000355304…	ADCY9,AHI1,AKAP3,APC,ARHGEF2,C19orf26,CEP164,CROCC,DISC1,DMD,DNAH11,DNAH2,DNAH5,DNAH7,FLNA,FUS,FXR1,GIGYF2,GPHN,HNRNPR,IFT140,IGF2BP1,KANK1,KSR1,LRP2,LRRC48,MACF1,MAP2,MAP4,MARK3,MOK,MPDZ,MYO10,MYO5A,MYO6,NPTN,OPA1,PREX1,RELN,RNF40,SACS,SCN1A,SCN8A,SLC8A2,SPATA13,SPTBN1,SYNE2,TRPM6,ULK3,UNC13A
GO:0005581	collagen trimer	8	88	0.0266	ENSP00000225964,ENSP00000262101,ENSP00000265379,ENSP00000295550,ENSP00000335196,ENSP00000355180,ENSP00000359603,ENSP00000362776	COL16A1,COL1A1,COL24A1,COL6A1,COL6A3,COL6A5,GLDN,MSR1
GO:0005938	cell cortex	14	230	0.0294	ENSP00000245503,ENSP00000263710,ENSP00000327251,ENSP00000329219,ENSP00000349259,ENSP00000358866,ENSP00000358994,ENSP00000370744,ENSP00000387266,ENSP00000405405,ENSP00000416015,ENSP00000421280,ENSP00000432568,ENSP00000445043	CLASP1,FLNA,FMNL1,FRY,ITPR2,MICAL3,MYH2,MYO10,MYO6,NOS2,PHLDB2,SPIRE1,SPTBN1,SPTBN2
GO:0005911	cell-cell junction	20	402	0.0363	ENSP00000245503,ENSP00000257430,ENSP00000264431,ENSP00000288135,ENSP00000288235,ENSP00000301607,ENSP00000303540,ENSP00000304604,ENSP00000304669,ENSP00000347719,ENSP00000354837,ENSP00000356774,ENSP00000358866,ENSP00000365198,ENSP00000374409,ENSP00000385450,ENSP00000385636,ENSP00000387739,ENSP00000406229,ENSP00000439807	AHI1,AMOTL1,APC,ARHGEF2,CTNNA1,EVPL,FAT1,FLNA,KAZN,KIT,MAGI1,MAGI3,MPDZ,MYH2,MYO1E,OBSL1,PKP4,RAPGEF2,SCN1A,TBCD
GO:0016461	unconventional myosin complex	3	10	0.0363	ENSP00000348349,ENSP00000358994,ENSP00000382177	MYO5A,MYO6,MYO9A
GO:0017146	NMDA selective glutamate receptor complex	3	10	0.0363	ENSP00000263269,ENSP00000379818,ENSP00000477455	GRIN2A,GRIN2B,GRIN2D
GO:0032982	myosin filament	4	22	0.0363	ENSP00000245503,ENSP00000262113,ENSP00000379616,ENSP00000464317	MYH11,MYH2,MYH3,MYOM2
GO:1990752	microtubule end	4	22	0.0363	ENSP00000263710,ENSP00000343818,ENSP00000356379,ENSP00000382177	ASPM,CDK5RAP2,CLASP1,MYO5A
GO:0000793	condensed chromosome	13	215	0.0384	ENSP00000263710,ENSP00000265148,ENSP00000273853,ENSP00000286398,ENSP00000309790,ENSP00000323421,ENSP00000347232,ENSP00000349961,ENSP00000362441,ENSP00000381773,ENSP00000418960,ENSP00000432768,ENSP00000457810	ATRX,BLM,BRCA1,CENPC,CENPE,CENPT,CKAP5,CLASP1,MIS18BP1,SMC1A,SMC2,SMC4,TOP3B
GO:0098858	actin-based cell projection	12	192	0.0414	ENSP00000290341,ENSP00000350719,ENSP00000353508,ENSP00000354923,ENSP00000358994,ENSP00000381768,ENSP00000382177,ENSP00000384582,ENSP00000398560,ENSP00000406229,ENSP00000406367,ENSP00000421280	CDH23,DMD,FAT1,GPR124,GPR98,IGF2BP1,MAP2,MYO10,MYO5A,MYO6,SPATA13,SYNE2
	REACTOME
#term ID	term description	observed gene count	background gene count	false discovery rate	matching proteins in your network (IDs)	matching proteins in your network (labels)
HSA-375165	NCAM signaling for neurite out-growth	9	60	0.0352	ENSP00000265379,ENSP00000288139,ENSP00000295550,ENSP00000320025,ENSP00000349259,ENSP00000355180,ENSP00000369756,ENSP00000385019,ENSP00000432568	CACNA1D,CACNA1I,CACNB2,COL6A1,COL6A3,COL6A5,PTPRA,SPTBN1,SPTBN2
	Key Word
#term ID	term description	observed gene count	background gene count	false discovery rate	matching proteins in your network (IDs)	matching proteins in your network (labels)
KW-0597	Phosphoprotein	324	8066	5.88e-27	ENSP00000007414,ENSP00000161863,ENSP00000171887,ENSP00000200453,ENSP00000202556,ENSP00000215862,ENSP00000222145,ENSP00000225964,ENSP00000228850,ENSP00000233099,ENSP00000236877,ENSP00000237536,ENSP00000245503,ENSP00000245907,ENSP00000247191,ENSP00000247226,ENSP00000249344,ENSP00000251047,ENSP00000251472,ENSP00000251507,ENSP00000251527,ENSP00000251691,ENSP00000252674,ENSP00000252804,ENSP00000254029…	AARS,ABCF1,ABLIM2,ACAP2,ADCY9,AFF1,AGL,AGTPBP1,AHDC1,AHI1,AKAP3,AMOTL1,ANKRD12,ANKRD26,ANKRD36C,APC,ARHGAP21,ARHGEF1,ARHGEF2,ARHGEF40,ARID4B,ASPM,ATAD3A,ATP4A,ATRX,BAZ2B,BCL11A,BICC1,BLM,BRCA1,BRD3,C19orf26,C3,CACNA1D,CACNA1E,CACNA1I,CACNB2,CAND1,CASP7,CBX6,CC2D1A,CCDC88B,CCT2,CDK5RAP2,CENPC,CENPE,CENPT,CEP135,CEP164,CEP170B,CEP350,CEP85L,CFAP44,CHGB,CHMP7,CHTF18,CIC,CIITA,CKAP5,CKMT1A,CLASP1,CLI…
KW-0025	Alternative splicing	363	10223	3.97e-22	ENSP00000007414,ENSP00000171887,ENSP00000200453,ENSP00000215862,ENSP00000219689,ENSP00000223366,ENSP00000233099,ENSP00000237536,ENSP00000241051,ENSP00000245503,ENSP00000247191,ENSP00000247226,ENSP00000249344,ENSP00000251507,ENSP00000251527,ENSP00000252804,ENSP00000254029,ENSP00000254108,ENSP00000255882,ENSP00000256707,ENSP00000257177,ENSP00000257287,ENSP00000257430,ENSP00000258991,ENSP00000259808…	AARS,ABCF1,ABLIM2,ACAN,ACHE,ADAMTS20,ADAMTSL1,AFF1,AGL,AGTPBP1,AHI1,ALS2CR11,AMOTL1,ANKRD12,ANKRD26,ANKRD32,ANKRD36,ANKRD36C,APC,ARHGAP21,ARHGAP26,ARHGEF1,ARHGEF2,ARHGEF40,ARID4B,ASPM,ATAD3A,ATRX,BAZ2B,BCL11A,BICC1,BRCA1,BRD3,C17orf97,C19orf26,CACNA1D,CACNA1E,CACNA1I,CACNB2,CAMTA1,CAND1,CANT1,CASP7,CC2D1A,CCDC141,CCDC149,CCDC171,CCDC30,CCDC88B,CCT2,CDH23,CDK5RAP2,CENPC,CENPE,CENPT,CEP135,CEP164,C…
KW-0677	Repeat	214	4751	3.28e-19	ENSP00000161863,ENSP00000200453,ENSP00000202556,ENSP00000225964,ENSP00000233099,ENSP00000236877,ENSP00000251527,ENSP00000252804,ENSP00000254029,ENSP00000254108,ENSP00000256707,ENSP00000257177,ENSP00000257430,ENSP00000259335,ENSP00000261839,ENSP00000262113,ENSP00000262126,ENSP00000262715,ENSP00000262719,ENSP00000263636,ENSP00000263710,ENSP00000263816,ENSP00000264515,ENSP00000265104,ENSP00000265140…	ABCF1,ABLIM2,ACAN,ACAP2,ADAMTS20,ADAMTS7,ADAMTSL1,ADCY9,AHDC1,AHI1,AIM1L,ANKRD12,ANKRD26,ANKRD32,ANKRD36,ANKRD36C,ANKRD60,APC,ASPM,BCL11A,BICC1,BRCA1,BRD3,C17orf97,CACNA1D,CACNA1E,CACNA1I,CAMTA1,CAND1,CDH23,CFAP44,CIITA,CKAP5,CLASP1,CLIP4,CMYA5,COL16A1,COL1A1,COL24A1,COL6A1,COL6A3,COL6A5,CORO6,CPS1,CRACR2B,DCAF11,DCDC1,DCDC2C,DENND4B,DENND5B,DMD,DMXL1,DNAH11,DNAH2,DNAH5,DNAH7,EPHA1,EPHA10,EPS15L1…
KW-0621	Polymorphism	377	11707	5.19e-15	ENSP00000007414,ENSP00000161863,ENSP00000171887,ENSP00000200453,ENSP00000215862,ENSP00000216468,ENSP00000219689,ENSP00000222145,ENSP00000223366,ENSP00000225964,ENSP00000228850,ENSP00000233099,ENSP00000236877,ENSP00000237536,ENSP00000241051,ENSP00000245503,ENSP00000245907,ENSP00000247191,ENSP00000247226,ENSP00000249044,ENSP00000249344,ENSP00000251047,ENSP00000251472,ENSP00000251507,ENSP00000251527…	AARS,ABCF1,ABLIM2,ACAN,ACHE,ADAMTS20,ADAMTS7,ADAMTSL1,ADCY9,AFF1,AGL,AGTPBP1,AHDC1,AHI1,AIM1L,AKAP3,ALS2CR11,AMOTL1,ANKRD12,ANKRD26,ANKRD32,ANKRD60,AP1G2,APC,APOL5,ARHGAP21,ARHGEF1,ARHGEF40,ASPM,ATAD3A,ATP4A,ATRX,BAZ2B,BCL11A,BICC1,BLM,BRCA1,BRD3,C17orf97,C3,CACNA1D,CACNA1E,CACNA1I,CACNB2,CAMTA1,CAND1,CANT1,CASP7,CC2D1A,CCDC141,CCDC171,CCDC30,CCDC38,CCDC88B,CCRN4L,CDH23,CDK5RAP2,CENPC,CENPE,CENPT…
KW-0067	ATP-binding	84	1367	2.92e-12	ENSP00000161863,ENSP00000215862,ENSP00000223366,ENSP00000245503,ENSP00000251472,ENSP00000255882,ENSP00000259808,ENSP00000261772,ENSP00000261839,ENSP00000262315,ENSP00000262623,ENSP00000262715,ENSP00000265104,ENSP00000265148,ENSP00000265594,ENSP00000275815,ENSP00000286398,ENSP00000288135,ENSP00000288235,ENSP00000291906,ENSP00000294016,ENSP00000297814,ENSP00000299300,ENSP00000304604,ENSP00000310219…	AARS,ABCF1,ADCY9,ATAD3A,ATP4A,ATRX,BLM,CCT2,CENPE,CHTF18,CIITA,CKMT1A,CPS1,DDX11,DDX31,DDX42,DHX37,DNA2,DNAH11,DNAH2,DNAH5,DNAH7,EP400,EPHA1,EPHA10,GCK,GPHN,HFM1,HSPA6,IKBKE,JAK3,KIAA1804,KIF16B,KIF24,KIF27,KIT,KSR2,LONP1,MAGI1,MAGI3,MAP3K2,MAP3K4,MARK3,MAST1,MAST2,MCCC1,MDN1,MOK,MORC2,MYH11,MYH2,MYH3,MYO10,MYO1E,MYO1H,MYO5A,MYO5C,MYO6,MYO9A,NLRP2,NLRP9,PAICS,PI4KA,PKN3,RIPK1,RNASEL,RPS6KA2,RPS6K…
KW-0206	Cytoskeleton	76	1198	1.08e-11	ENSP00000171887,ENSP00000247191,ENSP00000251472,ENSP00000257287,ENSP00000257430,ENSP00000259335,ENSP00000262102,ENSP00000263710,ENSP00000265104,ENSP00000265140,ENSP00000265148,ENSP00000266070,ENSP00000270176,ENSP00000274498,ENSP00000278935,ENSP00000288235,ENSP00000297814,ENSP00000301607,ENSP00000304669,ENSP00000309116,ENSP00000311273,ENSP00000313601,ENSP00000317144,ENSP00000326550,ENSP00000331983…	AHI1,ANKRD32,APC,ARHGAP21,ARHGAP26,ARHGEF2,ASPM,CC2D1A,CCDC141,CCDC38,CCDC88B,CDK5RAP2,CENPE,CEP135,CEP164,CEP170B,CEP350,CEP85L,CFAP44,CKAP5,CLASP1,CNTROB,CROCC,CTNNA1,DCDC1,DDX11,DIDO1,DISC1,DLGAP5,DMD,DNAH11,DNAH2,DNAH5,DNAH7,EVPL,FLNA,FRY,GAS2L3,GPHN,IFT140,KAZN,KIAA0368,KIF16B,KIF24,KIF27,LRRC16A,LRRC48,MACF1,MAP2,MAP4,MAP7D1,MAST1,MAST2,MICAL3,MTUS1,MYO10,MYO1E,OBSL1,PIBF1,PKP4,PTPN7,RABGAP…
KW-0175	Coiled coil	109	2158	4.34e-11	ENSP00000215862,ENSP00000245503,ENSP00000247191,ENSP00000254029,ENSP00000257287,ENSP00000257430,ENSP00000261839,ENSP00000262101,ENSP00000262102,ENSP00000263073,ENSP00000263710,ENSP00000264183,ENSP00000265104,ENSP00000265148,ENSP00000270176,ENSP00000278935,ENSP00000286398,ENSP00000287380,ENSP00000291906,ENSP00000294008,ENSP00000296137,ENSP00000297814,ENSP00000298694,ENSP00000300648,ENSP00000301607…	ACAP2,AHI1,AMOTL1,ANKRD26,ANKRD36,ANKRD36C,APC,ARHGEF1,ARHGEF2,ARHGEF40,ARID4B,ASPM,ATAD3A,BAZ2B,BRD3,CC2D1A,CCDC141,CCDC149,CCDC171,CCDC30,CCDC38,CCDC88B,CENPE,CEP135,CEP164,CEP350,CEP85L,CFAP44,CHMP7,CLASP1,CMYA5,CNOT10,CNTROB,CORO6,CRACR2B,CROCC,CWC15,DDX42,DISC1,DLGAP5,DNAH11,DNAH12,DNAH2,DNAH5,DNAH7,EHBP1L1,EID2,EPS15L1,EVPL,FAM186A,FAN1,FBXO41,FLG,FYCO1,GCN1L1,KANK1,KAZN,KIF16B,KIF27,LAMB4,…
KW-0963	Cytoplasm	194	4972	9.57e-11	ENSP00000007414,ENSP00000161863,ENSP00000171887,ENSP00000202556,ENSP00000215862,ENSP00000222145,ENSP00000223366,ENSP00000245503,ENSP00000247191,ENSP00000249044,ENSP00000249344,ENSP00000251472,ENSP00000251691,ENSP00000254029,ENSP00000255882,ENSP00000257177,ENSP00000257287,ENSP00000257430,ENSP00000259335,ENSP00000259808,ENSP00000261772,ENSP00000262102,ENSP00000262113,ENSP00000262719,ENSP00000263073…	AARS,ABCF1,ABLIM2,AGL,AGTPBP1,AHI1,ANKRD32,APC,APOL5,ARHGAP21,ARHGAP26,ARHGEF1,ARHGEF2,ARHGEF40,ARID4B,ASPM,BCL11A,BICC1,BRCA1,CAMTA1,CAND1,CASP7,CC2D1A,CCDC141,CCDC38,CCDC88B,CCRN4L,CCT2,CDK5RAP2,CENPE,CEP135,CEP164,CEP170B,CEP350,CEP85L,CFAP44,CHMP7,CKAP5,CLASP1,CMYA5,CNOT10,CNTROB,CROCC,CTNNA1,DCDC1,DCDC2C,DDX11,DDX42,DIDO1,DISC1,DLGAP5,DMD,DNAH11,DNAH2,DNAH5,DNAH7,DOCK5,DOCK6,EVPL,EYA2,FAT1,F…
KW-0547	Nucleotide-binding	88	1758	1.41e-08	ENSP00000161863,ENSP00000215862,ENSP00000223366,ENSP00000245503,ENSP00000251472,ENSP00000255882,ENSP00000259808,ENSP00000261772,ENSP00000261839,ENSP00000262315,ENSP00000262623,ENSP00000262715,ENSP00000263116,ENSP00000265104,ENSP00000265148,ENSP00000265594,ENSP00000267396,ENSP00000275815,ENSP00000286398,ENSP00000288135,ENSP00000288235,ENSP00000291906,ENSP00000294016,ENSP00000297814,ENSP00000299300…	AARS,ABCF1,ADCY9,ATAD3A,ATP4A,ATRX,BLM,CCT2,CENPE,CHTF18,CIITA,CKMT1A,CPS1,DDX11,DDX31,DDX42,DHX37,DNA2,DNAH11,DNAH2,DNAH5,DNAH7,EP400,EPHA1,EPHA10,GCK,GPHN,GTPBP2,HFM1,HSPA6,IKBKE,JAK3,KIAA1804,KIF16B,KIF24,KIF27,KIT,KSR2,LONP1,MAGI1,MAGI3,MAP3K2,MAP3K4,MARK3,MAST1,MAST2,MCCC1,MDN1,MOK,MORC2,MYH11,MYH2,MYH3,MYO10,MYO1E,MYO1H,MYO5A,MYO5C,MYO6,MYO9A,NLRP2,NLRP9,OPA1,PAICS,PI4KA,PKN3,RAB36,REM2,RIP…
KW-0505	Motor protein	18	131	7.34e-07	ENSP00000245503,ENSP00000261839,ENSP00000265104,ENSP00000265148,ENSP00000288235,ENSP00000297814,ENSP00000311273,ENSP00000348349,ENSP00000358994,ENSP00000368464,ENSP00000379616,ENSP00000382177,ENSP00000384164,ENSP00000421280,ENSP00000439182,ENSP00000458355,ENSP00000464317,ENSP00000475939	CENPE,DNAH11,DNAH2,DNAH5,DNAH7,KIF16B,KIF24,KIF27,MYH11,MYH2,MYH3,MYO10,MYO1E,MYO1H,MYO5A,MYO5C,MYO6,MYO9A
KW-0344	Guanine-nucleotide releasing factor	18	156	7.32e-06	ENSP00000251691,ENSP00000264431,ENSP00000276440,ENSP00000288368,ENSP00000294618,ENSP00000296859,ENSP00000298694,ENSP00000310933,ENSP00000337261,ENSP00000343656,ENSP00000354597,ENSP00000354837,ENSP00000360431,ENSP00000360916,ENSP00000361009,ENSP00000370196,ENSP00000373734,ENSP00000398560	ARHGEF1,ARHGEF2,ARHGEF40,DENND4B,DENND5B,DOCK5,DOCK6,KIAA1244,MADD,PLCE1,PREX1,PREX2,RAPGEF2,RAPGEF5,RAPGEF6,SBF1,SPATA13,VAV2
KW-0009	Actin-binding	23	266	1.78e-05	ENSP00000171887,ENSP00000245503,ENSP00000261839,ENSP00000288235,ENSP00000348349,ENSP00000349259,ENSP00000350719,ENSP00000354573,ENSP00000354923,ENSP00000358866,ENSP00000358994,ENSP00000378965,ENSP00000379616,ENSP00000382177,ENSP00000386840,ENSP00000387266,ENSP00000416015,ENSP00000421280,ENSP00000427567,ENSP00000432568,ENSP00000439182,ENSP00000448955,ENSP00000464317	DMD,FHDC1,FLNA,GAS2L3,MACF1,MICAL3,MYH11,MYH2,MYH3,MYO10,MYO1E,MYO1H,MYO5A,MYO5C,MYO6,MYO9A,SNTB1,SPIRE1,SPTBN1,SPTBN2,SYNE2,TNS1,XIRP2
KW-0832	Ubl conjugation	96	2380	3.78e-05	ENSP00000200453,ENSP00000215862,ENSP00000247191,ENSP00000252674,ENSP00000254108,ENSP00000257430,ENSP00000259335,ENSP00000259808,ENSP00000261441,ENSP00000261772,ENSP00000264183,ENSP00000264431,ENSP00000264498,ENSP00000264515,ENSP00000265140,ENSP00000265148,ENSP00000266070,ENSP00000266269,ENSP00000267807,ENSP00000268638,ENSP00000273853,ENSP00000275815,ENSP00000277225,ENSP00000283254,ENSP00000288135…	AARS,AGL,AHDC1,AMOTL1,ANKRD32,APC,ARHGAP21,ARID4B,ATRX,BAZ2B,BCL11A,BLM,BRCA1,BRD3,CCT2,CENPC,CENPE,CTNNA1,CUL4B,DDX42,DIDO1,DISC1,DLGAP5,EPHA1,FAM208B,FAN1,FANCI,FGF2,FHL1,FLNA,FUS,FXR1,FZD8,GIGYF2,HLA-DRB1,HNRNPR,IKBKE,IRF8,KIAA0368,KIT,KMT2A,LRIF1,LSM4,MAGI3,MAP3K2,MAP4,MAP7D1,MAST2,MIS18BP1,MLLT1,MORC2,MTX1,NEDD4L,NFAT5,NKRF,NOS2,PATZ1,PHF20L1,PPP1R15A,RAI1,RAPGEF2,RARG,RBBP5,RBM17,RIPK1,RNF4…
KW-0518	Myosin	10	50	3.8e-05	ENSP00000245503,ENSP00000261839,ENSP00000288235,ENSP00000348349,ENSP00000358994,ENSP00000379616,ENSP00000382177,ENSP00000421280,ENSP00000439182,ENSP00000464317	MYH11,MYH2,MYH3,MYO10,MYO1E,MYO1H,MYO5A,MYO5C,MYO6,MYO9A
KW-1017	Isopeptide bond	75	1713	3.8e-05	ENSP00000215862,ENSP00000247191,ENSP00000252674,ENSP00000254108,ENSP00000259335,ENSP00000259808,ENSP00000261441,ENSP00000264183,ENSP00000264498,ENSP00000264515,ENSP00000265140,ENSP00000266070,ENSP00000266269,ENSP00000267807,ENSP00000273853,ENSP00000277225,ENSP00000294008,ENSP00000299300,ENSP00000304669,ENSP00000305918,ENSP00000309790,ENSP00000310842,ENSP00000311430,ENSP00000316527,ENSP00000323074…	AHDC1,ANKRD32,ARHGAP21,ARID4B,ATRX,BAZ2B,BCL11A,BLM,BRCA1,BRD3,CCT2,CENPC,CTNNA1,CUL4B,DDX42,DIDO1,DISC1,DLGAP5,FAM208B,FANCI,FGF2,FHL1,FLNA,FUS,FXR1,GIGYF2,HLA-DRB1,HNRNPR,IKBKE,KIAA0368,KMT2A,LRIF1,LSM4,MAP4,MAP7D1,MIS18BP1,MLLT1,MORC2,MTX1,NFAT5,NKRF,PATZ1,PHF20L1,RAI1,RARG,RBBP5,RBM17,RIPK1,RNF40,RPL4,RRBP1,RRP12,RSBN1,SAMD11,SLTM,SLX4,SOX6,SRRT,TAF15,TCOF1,TDRD3,TKT,TNRC18,TOP1,U2SURP,UHRF1,…
KW-9995	Disease	137	3799	4.45e-05	ENSP00000215862,ENSP00000223366,ENSP00000225964,ENSP00000245503,ENSP00000245907,ENSP00000252674,ENSP00000252804,ENSP00000254108,ENSP00000255882,ENSP00000256707,ENSP00000257287,ENSP00000257430,ENSP00000261381,ENSP00000261517,ENSP00000261772,ENSP00000262102,ENSP00000262483,ENSP00000262719,ENSP00000263269,ENSP00000263816,ENSP00000263857,ENSP00000264431,ENSP00000265104,ENSP00000265148,ENSP00000265594…	AARS,ACAN,AFF1,AGL,AHDC1,AHI1,APC,ARHGAP26,ARHGEF2,ASPM,ATAD3A,ATRX,BCL11A,BICC1,BLM,BRCA1,C3,CACNA1D,CACNB2,CAMTA1,CANT1,CC2D1A,CDH23,CDK5RAP2,CENPE,CEP135,CEP164,CIC,CIITA,COL1A1,COL6A1,COL6A3,CPS1,CUL4B,CYP11B2,DDX11,DISC1,DMD,DNA2,DNAH11,DNAH5,EYS,FAN1,FANCI,FBN1,FEZF1,FHL1,FLG,FLNA,FREM1,FUS,FYCO1,GCK,GIGYF2,GLDN,GPHN,GPR101,GPR179,GPR98,GREB1L,GRIN2A,GRIN2B,GRIN2D,GTPBP2,HFM1,HIVEP2,HSPG2,I…
KW-0112	Calmodulin-binding	16	152	6.6e-05	ENSP00000236877,ENSP00000245503,ENSP00000261839,ENSP00000288235,ENSP00000327251,ENSP00000343818,ENSP00000349259,ENSP00000353508,ENSP00000356379,ENSP00000358994,ENSP00000378965,ENSP00000379616,ENSP00000382177,ENSP00000410309,ENSP00000421280,ENSP00000464317	ASPM,CDK5RAP2,MAP2,MYH11,MYH2,MYH3,MYO10,MYO1E,MYO5A,MYO5C,MYO6,NOS2,PDE1A,SLC8A2,SNTB1,SPTBN1
KW-0225	Disease mutation	110	2951	0.00014	ENSP00000215862,ENSP00000223366,ENSP00000225964,ENSP00000245503,ENSP00000245907,ENSP00000252804,ENSP00000254108,ENSP00000255882,ENSP00000256707,ENSP00000257430,ENSP00000261381,ENSP00000261517,ENSP00000261772,ENSP00000262102,ENSP00000262483,ENSP00000263269,ENSP00000263816,ENSP00000263857,ENSP00000265104,ENSP00000265148,ENSP00000265594,ENSP00000267163,ENSP00000268638,ENSP00000268876,ENSP00000274498…	AARS,ACAN,AGL,AHI1,APC,ARHGAP26,ASPM,ATAD3A,ATRX,BCL11A,BICC1,BLM,BRCA1,C3,CACNA1D,CACNB2,CANT1,CDH23,CENPE,CEP164,CIC,CIITA,COL1A1,COL6A1,COL6A3,CPS1,CUL4B,CYP11B2,DDX11,DMD,DNA2,DNAH11,DNAH5,EYS,FAN1,FANCI,FBN1,FEZF1,FHL1,FLNA,FREM1,FUS,FYCO1,GCK,GIGYF2,GLDN,GPHN,GPR101,GPR179,GREB1L,GRIN2A,GRIN2B,GRIN2D,GTPBP2,HFM1,HSPG2,IFT140,IRF8,ITPR2,JAK3,KIDINS220,KIT,LONP1,LRP2,MARK3,MCCC1,MORC2,MTUS1,M…
KW-0493	Microtubule	21	275	0.00021	ENSP00000257430,ENSP00000262102,ENSP00000263710,ENSP00000265104,ENSP00000265148,ENSP00000297814,ENSP00000311273,ENSP00000343818,ENSP00000353375,ENSP00000353508,ENSP00000354573,ENSP00000354837,ENSP00000355593,ENSP00000368464,ENSP00000384164,ENSP00000385936,ENSP00000404151,ENSP00000427567,ENSP00000448955,ENSP00000458355,ENSP00000475939	APC,ARHGEF2,CDK5RAP2,CENPE,CEP170B,CLASP1,DCDC1,DISC1,DNAH11,DNAH2,DNAH5,DNAH7,FHDC1,GAS2L3,KIF16B,KIF24,KIF27,MACF1,MAP2,MAP4,MTUS1
KW-0488	Methylation	46	959	0.00043	ENSP00000202556,ENSP00000222145,ENSP00000245503,ENSP00000247226,ENSP00000254108,ENSP00000257177,ENSP00000261517,ENSP00000263073,ENSP00000263269,ENSP00000264498,ENSP00000265148,ENSP00000266070,ENSP00000267163,ENSP00000277225,ENSP00000294618,ENSP00000310219,ENSP00000311430,ENSP00000311684,ENSP00000338774,ENSP00000340900,ENSP00000351777,ENSP00000354671,ENSP00000358064,ENSP00000361232,ENSP00000362441…	AHDC1,ARHGAP21,ATRX,BCL11A,CENPE,CIC,DDX31,DDX42,DIDO1,DOCK6,EID2,FAM120B,FAT3,FBXO41,FGF2,FUS,GIGYF2,GRIN2D,HSPA6,MAST2,MIA3,MPDZ,MTCH1,MYH11,MYH2,MYH3,PKP4,PLEKHG3,PPP1R13B,RARG,RASIP1,RB1,RPL4,RPRD2,RXRB,SAA1,SBF1,SLTM,SMG6,SPEG,SRRT,TAF15,VCP,VPS13C,ZCCHC11,ZNF462
KW-0479	Metal-binding	123	3633	0.0024	ENSP00000215862,ENSP00000225964,ENSP00000236877,ENSP00000251047,ENSP00000251472,ENSP00000251527,ENSP00000252804,ENSP00000254108,ENSP00000257177,ENSP00000261381,ENSP00000261441,ENSP00000261772,ENSP00000262483,ENSP00000262623,ENSP00000262719,ENSP00000263073,ENSP00000263816,ENSP00000263857,ENSP00000264151,ENSP00000265459,ENSP00000266070,ENSP00000266269,ENSP00000267807,ENSP00000277225,ENSP00000280614…	AARS,ABLIM2,ACAN,ACAP2,ADAMTS20,ADAMTS7,ADCY9,AGTPBP1,ARHGEF2,ATP4A,ATRX,BAZ2B,BCL11A,BLM,BRCA1,CACNA1D,CACNA1E,CANT1,CCRN4L,CDH23,COL1A1,CYP11B2,DDX11,DIDO1,DMD,DNA2,DNLZ,EFCAB5,EPS15L1,ESYT2,EXD3,EYA2,FAN1,FEZF1,FHL1,FLG,FREM1,FUS,FYCO1,GIT1,GPHN,GRIN2A,GRIN2B,HIVEP2,HSPG2,JMJD2C,KIT,KMT2A,KSR1,KSR2,LETM1,LMAN1,LONRF2,LRP2,MACF1,MAP3K2,MAP3K4,MAST1,MAST2,MICAL3,MOK,MORC2,MYO9A,NOS2,NRXN2,OSGEPL…
KW-0905	Primary microcephaly	6	29	0.0027	ENSP00000257287,ENSP00000265148,ENSP00000295888,ENSP00000343818,ENSP00000356379,ENSP00000384792	ASPM,CDK5RAP2,CENPE,CEP135,WDFY3,WDR62
KW-0728	SH3 domain	16	221	0.0033	ENSP00000202556,ENSP00000274498,ENSP00000276440,ENSP00000288235,ENSP00000301607,ENSP00000309714,ENSP00000320025,ENSP00000340900,ENSP00000341957,ENSP00000354573,ENSP00000355583,ENSP00000356774,ENSP00000360916,ENSP00000390630,ENSP00000398560,ENSP00000479326	AHI1,ARHGAP26,CACNB2,DOCK5,EVPL,KIAA1804,MACF1,MIA3,MYO1E,PPP1R13B,RIMBP3B,RIMBP3C,SH3PXD2B,SPATA13,TP53BP2,VAV2
KW-0966	Cell projection	41	910	0.0035	ENSP00000236877,ENSP00000257430,ENSP00000263816,ENSP00000265104,ENSP00000290341,ENSP00000295888,ENSP00000297814,ENSP00000309714,ENSP00000311273,ENSP00000329219,ENSP00000331983,ENSP00000335196,ENSP00000353508,ENSP00000354573,ENSP00000354837,ENSP00000355304,ENSP00000356579,ENSP00000356774,ENSP00000358994,ENSP00000364691,ENSP00000377428,ENSP00000381023,ENSP00000381958,ENSP00000382097,ENSP00000382140…	AHI1,APC,ARHGEF2,C19orf26,CEP350,CFAP44,CROCC,DCDC2C,DNAH11,DNAH2,DNAH5,DNAH7,FHDC1,FMNL1,GLDN,GPHN,GPR124,GPR98,IFT140,IGF2BP1,KANK1,KIF27,KSR1,LRP2,LRRC16A,LRRC48,MACF1,MAP2,MARK3,MICAL3,MOK,MPDZ,MYO10,MYO6,SCN9A,SH3PXD2B,SLC8A2,SPATA13,TENM3,TRPM2,WDFY3
KW-0106	Calcium	39	866	0.0049	ENSP00000225964,ENSP00000236877,ENSP00000251527,ENSP00000252804,ENSP00000262483,ENSP00000263269,ENSP00000263816,ENSP00000265459,ENSP00000288139,ENSP00000305653,ENSP00000307674,ENSP00000320025,ENSP00000325527,ENSP00000327251,ENSP00000354006,ENSP00000354573,ENSP00000354923,ENSP00000356545,ENSP00000357789,ENSP00000360431,ENSP00000363827,ENSP00000370744,ENSP00000374135,ENSP00000378312,ENSP00000378965…	ACAN,CACNA1D,CACNA1E,CACNA1I,CACNB2,CANT1,CDH23,COL1A1,DMD,EFCAB5,EPS15L1,ESYT2,EYS,FAT1,FAT3,FBN1,FLG,FREM1,GPR98,GRIN2A,GRIN2B,GRIN2D,HSPG2,ITPR2,LETM1,LRP1B,LRP2,MACF1,NOS2,NRXN2,PITPNM3,PLCE1,PXDN,RELN,SLC8A2,SNTB1,TKT,TRPM2,TRPM6
KW-0343	GTPase activation	14	190	0.006	ENSP00000251507,ENSP00000264431,ENSP00000268989,ENSP00000274498,ENSP00000324287,ENSP00000335029,ENSP00000337261,ENSP00000341489,ENSP00000347719,ENSP00000348349,ENSP00000362751,ENSP00000378338,ENSP00000379709,ENSP00000448182	ACAP2,ARHGAP21,ARHGAP26,ARHGEF1,GIT1,MYO9A,RABGAP1,RABGAP1L,RAPGEF2,RASA3,SGSM2,SYDE1,TBC1D15,TBCD
KW-0272	Extracellular matrix	17	263	0.0062	ENSP00000225964,ENSP00000252804,ENSP00000265379,ENSP00000295550,ENSP00000325527,ENSP00000335196,ENSP00000355180,ENSP00000359603,ENSP00000362776,ENSP00000363827,ENSP00000369921,ENSP00000373433,ENSP00000373472,ENSP00000374071,ENSP00000387356,ENSP00000392423,ENSP00000412940	ACAN,ADAMTS20,ADAMTS7,ADAMTSL1,COL16A1,COL1A1,COL24A1,COL6A1,COL6A3,COL6A5,FBN1,FREM1,GLDN,HSPG2,LAMB4,PXDN,RELN
KW-0234	DNA repair	19	318	0.0071	ENSP00000265140,ENSP00000265963,ENSP00000278935,ENSP00000294008,ENSP00000310842,ENSP00000318641,ENSP00000323421,ENSP00000333640,ENSP00000347232,ENSP00000351185,ENSP00000351777,ENSP00000354497,ENSP00000359292,ENSP00000362441,ENSP00000384109,ENSP00000402515,ENSP00000418960,ENSP00000440402,ENSP00000479617	ANKRD32,ATRX,BLM,BRCA1,CEP164,CUL4B,DDX11,DNA2,EYA2,FAM178A,FAN1,FANCI,GTF2H1,INTS3,SLX4,SMC1A,SMG1,UHRF1,VCP
KW-0040	ANK repeat	16	249	0.0089	ENSP00000161863,ENSP00000202556,ENSP00000256707,ENSP00000262126,ENSP00000265140,ENSP00000306522,ENSP00000324287,ENSP00000327009,ENSP00000341957,ENSP00000356530,ENSP00000365255,ENSP00000378338,ENSP00000391950,ENSP00000396747,ENSP00000403302,ENSP00000477725	ACAP2,ANKRD12,ANKRD26,ANKRD32,ANKRD36,ANKRD36C,ANKRD60,CAMTA1,CLIP4,GIT1,KANK1,KIDINS220,PPP1R13B,RNASEL,TP53BP2,YTHDC2
KW-0227	DNA damage	21	379	0.0089	ENSP00000264433,ENSP00000265140,ENSP00000265963,ENSP00000278935,ENSP00000294008,ENSP00000310842,ENSP00000318641,ENSP00000323421,ENSP00000333640,ENSP00000347232,ENSP00000351185,ENSP00000351777,ENSP00000354497,ENSP00000359292,ENSP00000362441,ENSP00000384109,ENSP00000402515,ENSP00000418960,ENSP00000440402,ENSP00000464030,ENSP00000479617	ANKRD32,ATRX,BLM,BRCA1,CEP164,CUL4B,DDX11,DNA2,EYA2,FAM178A,FAN1,FANCI,FNIP2,GTF2H1,IKBKE,INTS3,SLX4,SMC1A,SMG1,UHRF1,VCP
KW-0242	Dwarfism	12	155	0.0089	ENSP00000225964,ENSP00000261381,ENSP00000307674,ENSP00000325527,ENSP00000347232,ENSP00000351185,ENSP00000353826,ENSP00000384109,ENSP00000385636,ENSP00000387356,ENSP00000391481,ENSP00000442336	ACAN,BLM,CANT1,COL1A1,CUL4B,DNA2,FBN1,LONP1,OBSL1,TKT,TOP3A,XYLT1
KW-0007	Acetylation	110	3335	0.0099	ENSP00000215862,ENSP00000216468,ENSP00000252674,ENSP00000254029,ENSP00000257430,ENSP00000259335,ENSP00000261517,ENSP00000261772,ENSP00000261839,ENSP00000262719,ENSP00000263915,ENSP00000264151,ENSP00000265594,ENSP00000265963,ENSP00000266070,ENSP00000267163,ENSP00000276440,ENSP00000282030,ENSP00000286398,ENSP00000296137,ENSP00000296859,ENSP00000299300,ENSP00000300648,ENSP00000300651,ENSP00000304467…	AARS,AFF1,AHDC1,APC,ARHGEF2,ATAD3A,ATRX,BAZ2B,BICC1,BLM,BRCA1,BRD3,CAND1,CASP7,CCT2,CIC,CKAP5,CNOT10,CPS1,CTNNA1,CUL4B,CWC15,DDX42,DENND5B,DIDO1,DNA2,DOCK5,EP400,EPS15L1,FHL1,FLNA,FXR1,FYCO1,GCN1L1,GIGYF2,GRB14,GTF2H1,HEATR1,HECTD3,HNRNPR,INTS1,INTS3,KIAA0368,KMT2A,LETM1,LRRC16A,LSM4,MACF1,MAP4,MCCC1,MDN1,MED1,MLLT1,MORC2,MYO10,MYO5A,MYO5C,NEDD4L,NFAT5,NOL10,OPA1,OSGEPL1,PAICS,PHF20L1,PHLPP1,PTPL…
KW-0799	Topoisomerase	3	6	0.0105	ENSP00000354522,ENSP00000381773,ENSP00000442336	TOP1,TOP3A,TOP3B
KW-0894	Sodium channel	5	28	0.0105	ENSP00000283254,ENSP00000303540,ENSP00000346534,ENSP00000381023,ENSP00000386306	SCN1A,SCN3A,SCN8A,SCN9A,TRPM2
KW-0965	Cell junction	33	735	0.0105	ENSP00000171887,ENSP00000257430,ENSP00000263269,ENSP00000264431,ENSP00000274498,ENSP00000288235,ENSP00000301607,ENSP00000303211,ENSP00000304604,ENSP00000304669,ENSP00000305288,ENSP00000309714,ENSP00000347719,ENSP00000350719,ENSP00000354837,ENSP00000354923,ENSP00000355593,ENSP00000356774,ENSP00000365198,ENSP00000374409,ENSP00000376421,ENSP00000378965,ENSP00000379709,ENSP00000379818,ENSP00000385450…	ACHE,AHI1,AMOTL1,APC,ARHGAP21,ARHGAP26,ARHGEF2,C19orf26,CTNNA1,DISC1,DMD,EVPL,GPHN,GRIN2A,GRIN2B,GRIN2D,KAZN,MAGI1,MAGI3,MPDZ,MYO1E,NLGN2,PKP4,RAPGEF2,SDK2,SH3PXD2B,SNTB1,SYNE2,TBCD,TNS1,UNC13A,XIRP2,ZNF185
KW-0991	Mental retardation	22	415	0.0105	ENSP00000256707,ENSP00000257287,ENSP00000270176,ENSP00000282030,ENSP00000303997,ENSP00000306522,ENSP00000313601,ENSP00000323421,ENSP00000338774,ENSP00000343818,ENSP00000346534,ENSP00000351185,ENSP00000354837,ENSP00000356379,ENSP00000356575,ENSP00000362441,ENSP00000363123,ENSP00000371532,ENSP00000384109,ENSP00000384792,ENSP00000458663,ENSP00000477455	AHDC1,ARHGEF2,ASPM,ATRX,BCL11A,CAMTA1,CC2D1A,CDK5RAP2,CEP135,CIC,CUL4B,DNA2,GRIN2B,GTPBP2,HIVEP2,KIDINS220,SCN8A,SCYL1,SETBP1,SMC1A,VLDLR,WDR62
KW-0347	Helicase	11	141	0.0109	ENSP00000161863,ENSP00000311135,ENSP00000347232,ENSP00000351185,ENSP00000352678,ENSP00000359454,ENSP00000361232,ENSP00000362441,ENSP00000374213,ENSP00000440402,ENSP00000464050	ATRX,BLM,DDX11,DDX31,DDX42,DHX37,DNA2,EP400,HFM1,SUPV3L1,YTHDC2
KW-0109	Calcium transport	9	100	0.0117	ENSP00000236877,ENSP00000288139,ENSP00000305653,ENSP00000320025,ENSP00000354006,ENSP00000356545,ENSP00000370744,ENSP00000381023,ENSP00000385019	CACNA1D,CACNA1E,CACNA1I,CACNB2,ITPR2,LETM1,SLC8A2,TRPM2,TRPM6
KW-0539	Nucleus	159	5200	0.0126	ENSP00000202556,ENSP00000215862,ENSP00000223366,ENSP00000247191,ENSP00000252674,ENSP00000254108,ENSP00000257177,ENSP00000259335,ENSP00000261441,ENSP00000262102,ENSP00000262126,ENSP00000262315,ENSP00000262519,ENSP00000262715,ENSP00000262719,ENSP00000263073,ENSP00000263857,ENSP00000264183,ENSP00000264498,ENSP00000264515,ENSP00000265140,ENSP00000265963,ENSP00000266070,ENSP00000266269,ENSP00000267163…	ABCF1,ACHE,AFF1,AGTPBP1,ANKRD12,ANKRD32,ARID4B,ASPM,ATRX,BAZ2B,BCL11A,BLM,BRCA1,BRD3,CAMTA1,CAND1,CBX6,CC2D1A,CCRN4L,CENPC,CENPT,CEP164,CEP350,CHMP7,CHTF18,CIC,CIITA,CMYA5,CNOT10,CPS1,CUL4B,CWC15,DDX11,DDX31,DDX42,DIDO1,DIP2A,DLGAP5,DNA2,EID2,EP400,EPS15L1,EYA2,FAM120B,FAM178A,FAN1,FANCI,FAT1,FEZF1,FGF2,FHL1,FUS,GCK,GTF2H1,HEATR1,HES6,HIRIP3,HIVEP2,HMGXB3,HNRNPR,IGF2BP1,IKBKE,INTS1,INTS3,IRF8,JMJ…
KW-0787	Thick filament	4	17	0.0126	ENSP00000245503,ENSP00000262113,ENSP00000379616,ENSP00000464317	MYH11,MYH2,MYH3,MYOM2
KW-0176	Collagen	8	84	0.0143	ENSP00000225964,ENSP00000262101,ENSP00000265379,ENSP00000295550,ENSP00000335196,ENSP00000355180,ENSP00000359603,ENSP00000362776	COL16A1,COL1A1,COL24A1,COL6A1,COL6A3,COL6A5,GLDN,MSR1
KW-0107	Calcium channel	7	67	0.0165	ENSP00000288139,ENSP00000320025,ENSP00000354006,ENSP00000356545,ENSP00000370744,ENSP00000381023,ENSP00000385019	CACNA1D,CACNA1E,CACNA1I,CACNB2,ITPR2,TRPM2,TRPM6
KW-0723	Serine/threonine-protein kinase	20	387	0.0178	ENSP00000251472,ENSP00000259808,ENSP00000291906,ENSP00000311684,ENSP00000343248,ENSP00000346644,ENSP00000354006,ENSP00000354671,ENSP00000355304,ENSP00000355583,ENSP00000358770,ENSP00000375986,ENSP00000387246,ENSP00000389715,ENSP00000400312,ENSP00000402515,ENSP00000408002,ENSP00000411397,ENSP00000427015,ENSP00000464030	IKBKE,KIAA1804,KSR2,MAP3K2,MAP3K4,MARK3,MAST1,MAST2,MOK,PKN3,RIPK1,RPS6KA2,RPS6KL1,SBK1,SLK,SMG1,SPEG,TRPM6,ULK3,VRK2
KW-0853	WD repeat	16	279	0.0178	ENSP00000254029,ENSP00000262715,ENSP00000264515,ENSP00000287380,ENSP00000295888,ENSP00000317971,ENSP00000344562,ENSP00000356774,ENSP00000371101,ENSP00000376333,ENSP00000377428,ENSP00000384792,ENSP00000404704,ENSP00000406012,ENSP00000415556,ENSP00000439479	AHI1,CFAP44,CORO6,DCAF11,DMXL1,IFT140,LLGL2,NOL10,RBBP5,TBC1D31,TEP1,VPS8,WDFY3,WDR44,WDR62,WDTC1
KW-0160	Chromosomal rearrangement	17	312	0.0212	ENSP00000225964,ENSP00000251507,ENSP00000252674,ENSP00000254108,ENSP00000266269,ENSP00000274498,ENSP00000305918,ENSP00000338774,ENSP00000354522,ENSP00000355593,ENSP00000357474,ENSP00000378578,ENSP00000379616,ENSP00000379818,ENSP00000436786,ENSP00000474096,ENSP00000477455	AFF1,ARHGAP26,BCL11A,BRD3,CEP85L,COL1A1,DISC1,FUS,GRIN2A,GRIN2B,KMT2A,MLLT1,MYH11,PATZ1,RABGAP1L,TAF15,TOP1
KW-0418	Kinase	28	631	0.0214	ENSP00000223366,ENSP00000251472,ENSP00000255882,ENSP00000259808,ENSP00000275815,ENSP00000288135,ENSP00000291906,ENSP00000311684,ENSP00000343248,ENSP00000346644,ENSP00000354006,ENSP00000354671,ENSP00000355304,ENSP00000355583,ENSP00000358770,ENSP00000362139,ENSP00000375986,ENSP00000387246,ENSP00000389715,ENSP00000391676,ENSP00000400312,ENSP00000402515,ENSP00000406577,ENSP00000408002,ENSP00000411397…	CIITA,CKMT1A,EPHA1,EPHA10,GCK,IKBKE,JAK3,KIAA1804,KIT,KSR2,MAP3K2,MAP3K4,MARK3,MAST1,MAST2,MOK,PI4KA,PKN3,RIPK1,RPS6KA2,RPS6KL1,SBK1,SLK,SMG1,SPEG,TRPM6,ULK3,VRK2
KW-0863	Zinc-finger	61	1726	0.0265	ENSP00000215862,ENSP00000254108,ENSP00000257177,ENSP00000266070,ENSP00000266269,ENSP00000267807,ENSP00000277225,ENSP00000295888,ENSP00000296137,ENSP00000302603,ENSP00000316527,ENSP00000323074,ENSP00000324287,ENSP00000325677,ENSP00000335029,ENSP00000338774,ENSP00000339659,ENSP00000343054,ENSP00000348349,ENSP00000350576,ENSP00000352836,ENSP00000354206,ENSP00000354497,ENSP00000354837,ENSP00000354923…	ACAP2,ARHGEF2,ATRX,BAZ2B,BCL11A,BRCA1,DIDO1,DMD,DNLZ,FAN1,FEZF1,FHL1,FUS,FYCO1,GIT1,HIVEP2,JMJD2C,KMT2A,KSR1,KSR2,LONRF2,MORC2,MYO9A,PATZ1,PHF20L1,PLEKHM1,POLR1B,RAI1,RARG,RASA3,RBM5,RNASEL,RNF40,RXRB,TAF15,TAX1BP1,TOP3A,TRIM2,TTC3,UHRF1,UNC13A,VAV2,VPS8,WDFY3,ZCCHC11,ZFAT,ZNF107,ZNF219,ZNF280D,ZNF300,ZNF316,ZNF318,ZNF441,ZNF462,ZNF556,ZNF609,ZNF66,ZNF675,ZNF729,ZSCAN31,ZZEF1
KW-0254	Endocytosis	9	124	0.0356	ENSP00000251507,ENSP00000251527,ENSP00000262101,ENSP00000263636,ENSP00000263816,ENSP00000358994,ENSP00000371532,ENSP00000374135,ENSP00000393313	EPS15L1,ESYT2,LRP1B,LRP2,LY75,MSR1,MYO6,RABGAP1L,VLDLR
KW-0245	EGF-like domain	13	229	0.0427	ENSP00000263816,ENSP00000265459,ENSP00000325527,ENSP00000363827,ENSP00000371532,ENSP00000374135,ENSP00000387356,ENSP00000392423,ENSP00000406229,ENSP00000422591,ENSP00000424226,ENSP00000424243,ENSP00000432586	ACAN,EYS,FAT1,FAT3,FBN1,HSPG2,LRP1B,LRP2,NRXN2,RELN,SLIT2,TENM3,VLDLR
KW-0131	Cell cycle	27	640	0.0438	ENSP00000247191,ENSP00000262315,ENSP00000263710,ENSP00000265148,ENSP00000267163,ENSP00000273853,ENSP00000278935,ENSP00000286398,ENSP00000309790,ENSP00000310842,ENSP00000323421,ENSP00000326550,ENSP00000341957,ENSP00000349961,ENSP00000354837,ENSP00000356379,ENSP00000362751,ENSP00000364691,ENSP00000369614,ENSP00000376333,ENSP00000384109,ENSP00000385936,ENSP00000416015,ENSP00000418960,ENSP00000432768…	ARHGEF2,ASPM,BRCA1,CENPC,CENPE,CENPT,CEP164,CHTF18,CKAP5,CLASP1,CNTROB,CROCC,CUL4B,DCDC1,DLGAP5,FANCI,LLGL2,MICAL3,MIS18BP1,RABGAP1,RB1,SMC1A,SMC2,SMC4,TACC3,TP53BP2,UHRF1
KW-0862	Zinc	76	2308	0.0451	ENSP00000215862,ENSP00000254108,ENSP00000257177,ENSP00000261772,ENSP00000263857,ENSP00000266070,ENSP00000266269,ENSP00000267807,ENSP00000277225,ENSP00000295888,ENSP00000296137,ENSP00000302603,ENSP00000304467,ENSP00000316527,ENSP00000323074,ENSP00000324287,ENSP00000325677,ENSP00000327251,ENSP00000335029,ENSP00000338512,ENSP00000338774,ENSP00000339659,ENSP00000343054,ENSP00000347232,ENSP00000348349…	AARS,ABLIM2,ACAP2,ADAMTS20,ADAMTS7,AGTPBP1,ARHGEF2,ATRX,BAZ2B,BCL11A,BLM,BRCA1,DIDO1,DMD,DNLZ,FAN1,FEZF1,FHL1,FUS,FYCO1,GIT1,GRIN2A,GRIN2B,HIVEP2,JMJD2C,KMT2A,KSR1,KSR2,LONRF2,MICAL3,MORC2,MYO9A,NOS2,PATZ1,PHF20L1,PLEKHM1,POLR1A,POLR1B,RAI1,RARG,RASA3,RBM5,RELN,RNASEL,RNF40,RXRB,TAF15,TAX1BP1,THOP1,TOP3A,TRIM2,TRPM6,TTC3,UHRF1,UNC13A,VAV2,VPS8,WDFY3,ZCCHC11,ZFAT,ZNF107,ZNF185,ZNF219,ZNF280D,ZNF30…
KW-0156	Chromatin regulator	15	287	0.0452	ENSP00000261441,ENSP00000262519,ENSP00000264183,ENSP00000264515,ENSP00000267163,ENSP00000305918,ENSP00000325677,ENSP00000333640,ENSP00000362441,ENSP00000370710,ENSP00000374213,ENSP00000384490,ENSP00000436786,ENSP00000440190,ENSP00000479617	ARID4B,ATRX,BRD3,CBX6,EP400,EYA2,JMJD2C,KMT2A,RB1,RBBP5,RNF40,RSBN1,SETD1A,TDRD3,UHRF1
	PFAM (Protein Famiies)
#term ID	term description	observed gene count	background gene count	false discovery rate	matching proteins in your network (IDs)	matching proteins in your network (labels)
PF00063	Myosin head (motor domain)	10	38	0.00011	ENSP00000245503,ENSP00000261839,ENSP00000288235,ENSP00000348349,ENSP00000358994,ENSP00000379616,ENSP00000382177,ENSP00000421280,ENSP00000439182,ENSP00000464317	MYH11,MYH2,MYH3,MYO10,MYO1E,MYO1H,MYO5A,MYO5C,MYO6,MYO9A
PF00307	Calponin homology (CH) domain	11	67	0.00068	ENSP00000312671,ENSP00000349259,ENSP00000350719,ENSP00000354573,ENSP00000354923,ENSP00000356379,ENSP00000358866,ENSP00000360916,ENSP00000416015,ENSP00000432568,ENSP00000448955	ASPM,DMD,EHBP1L1,FLNA,GAS2L3,MACF1,MICAL3,SPTBN1,SPTBN2,SYNE2,VAV2
PF11971	CAMSAP CH domain	8	29	0.00068	ENSP00000312671,ENSP00000349259,ENSP00000350719,ENSP00000354923,ENSP00000356379,ENSP00000360916,ENSP00000416015,ENSP00000432568	ASPM,DMD,EHBP1L1,MICAL3,SPTBN1,SPTBN2,SYNE2,VAV2
PF00169	PH domain	17	194	0.0023	ENSP00000007414,ENSP00000247226,ENSP00000262719,ENSP00000263915,ENSP00000274498,ENSP00000288368,ENSP00000324287,ENSP00000335029,ENSP00000349259,ENSP00000360916,ENSP00000370196,ENSP00000378965,ENSP00000379709,ENSP00000398560,ENSP00000405405,ENSP00000421280,ENSP00000432568	ACAP2,ARHGAP21,ARHGAP26,GRB14,MYO10,OSBPL7,PHLDB2,PHLPP1,PLEKHG3,PREX2,RASA3,SBF1,SNTB1,SPATA13,SPTBN1,SPTBN2,VAV2
PF00612	IQ calmodulin-binding motif	8	42	0.0029	ENSP00000261839,ENSP00000306522,ENSP00000346534,ENSP00000348349,ENSP00000356379,ENSP00000376910,ENSP00000382177,ENSP00000421280	ASPM,CAMTA1,LRRIQ1,MYO10,MYO5A,MYO5C,MYO9A,SCN8A
PF07728	AAA domain (dynein-related subfamily)	7	34	0.0051	ENSP00000262315,ENSP00000265104,ENSP00000351777,ENSP00000353826,ENSP00000358400,ENSP00000458355,ENSP00000475939	CHTF18,DNAH11,DNAH2,DNAH5,LONP1,MDN1,VCP
PF00788	Ras association (RalGDS/AF-6) domain	7	36	0.0054	ENSP00000222145,ENSP00000263915,ENSP00000264431,ENSP00000296859,ENSP00000348349,ENSP00000360431,ENSP00000421280	GRB14,MYO10,MYO9A,PLCE1,RAPGEF2,RAPGEF6,RASIP1
PF11933	Cytoplasmic domain of voltage-gated Na+ ion channel	4	6	0.0054	ENSP00000283254,ENSP00000303540,ENSP00000346534,ENSP00000386306	SCN1A,SCN3A,SCN8A,SCN9A
PF02210	Laminin G domain	7	39	0.0072	ENSP00000265459,ENSP00000359603,ENSP00000363827,ENSP00000406229,ENSP00000422591,ENSP00000424243,ENSP00000432586	COL24A1,EYS,FAT1,FAT3,HSPG2,NRXN2,SLIT2
PF00520	Ion transport protein	11	113	0.0127	ENSP00000283254,ENSP00000288139,ENSP00000303540,ENSP00000304127,ENSP00000346534,ENSP00000354006,ENSP00000356545,ENSP00000370744,ENSP00000381023,ENSP00000385019,ENSP00000386306	CACNA1D,CACNA1E,CACNA1I,ITPR2,KCNG3,SCN1A,SCN3A,SCN8A,SCN9A,TRPM2,TRPM6
PF06512	Sodium ion transport-associated	4	10	0.0152	ENSP00000283254,ENSP00000303540,ENSP00000346534,ENSP00000386306	SCN1A,SCN3A,SCN8A,SCN9A
PF00054	Laminin G domain	6	34	0.0184	ENSP00000265459,ENSP00000363827,ENSP00000406229,ENSP00000422591,ENSP00000424243,ENSP00000432586	EYS,FAT1,FAT3,HSPG2,NRXN2,SLIT2
PF00435	Spectrin repeat	5	22	0.0184	ENSP00000349259,ENSP00000350719,ENSP00000354573,ENSP00000354923,ENSP00000432568	DMD,MACF1,SPTBN1,SPTBN2,SYNE2
PF08016	Polycystin cation channel	6	34	0.0184	ENSP00000283254,ENSP00000288139,ENSP00000303540,ENSP00000356545,ENSP00000385019,ENSP00000386306	CACNA1D,CACNA1E,CACNA1I,SCN1A,SCN3A,SCN9A
PF07653	Variant SH3 domain	13	171	0.0221	ENSP00000202556,ENSP00000274498,ENSP00000276440,ENSP00000288235,ENSP00000309714,ENSP00000340900,ENSP00000341957,ENSP00000355583,ENSP00000356774,ENSP00000360916,ENSP00000390630,ENSP00000398560,ENSP00000479326	AHI1,ARHGAP26,DOCK5,KIAA1804,MIA3,MYO1E,PPP1R13B,RIMBP3B,RIMBP3C,SH3PXD2B,SPATA13,TP53BP2,VAV2
PF00069	Protein kinase domain	25	482	0.0234	ENSP00000251472,ENSP00000259808,ENSP00000270176,ENSP00000275815,ENSP00000288135,ENSP00000291906,ENSP00000311684,ENSP00000343248,ENSP00000346644,ENSP00000354671,ENSP00000355304,ENSP00000355583,ENSP00000356530,ENSP00000358770,ENSP00000362139,ENSP00000375986,ENSP00000381958,ENSP00000387246,ENSP00000389715,ENSP00000391676,ENSP00000400312,ENSP00000408002,ENSP00000411397,ENSP00000427015,ENSP00000464030	EPHA1,EPHA10,IKBKE,JAK3,KIAA1804,KIT,KSR1,KSR2,MAP3K2,MAP3K4,MARK3,MAST1,MAST2,MOK,PKN3,RIPK1,RNASEL,RPS6KA2,RPS6KL1,SBK1,SCYL1,SLK,SPEG,ULK3,VRK2
PF00621	RhoGEF domain	8	71	0.0234	ENSP00000247226,ENSP00000288368,ENSP00000298694,ENSP00000337261,ENSP00000354837,ENSP00000360916,ENSP00000361009,ENSP00000398560	ARHGEF1,ARHGEF2,ARHGEF40,PLEKHG3,PREX1,PREX2,SPATA13,VAV2
PF01391	Collagen triple helix repeat (20 copies)	8	76	0.0234	ENSP00000225964,ENSP00000262101,ENSP00000265379,ENSP00000295550,ENSP00000335196,ENSP00000355180,ENSP00000359603,ENSP00000362776	COL16A1,COL1A1,COL24A1,COL6A1,COL6A3,COL6A5,GLDN,MSR1
PF01843	DIL domain	3	6	0.0234	ENSP00000222145,ENSP00000261839,ENSP00000382177	MYO5A,MYO5C,RASIP1
PF03028	Dynein heavy chain and region D6 of dynein motor	4	14	0.0234	ENSP00000265104,ENSP00000311273,ENSP00000458355,ENSP00000475939	DNAH11,DNAH2,DNAH5,DNAH7
PF03456	uDENN domain	4	15	0.0234	ENSP00000310933,ENSP00000354597,ENSP00000370196,ENSP00000373734	DENND4B,DENND5B,MADD,SBF1
PF06470	SMC proteins Flexible Hinge Domain	3	6	0.0234	ENSP00000286398,ENSP00000323421,ENSP00000349961	SMC1A,SMC2,SMC4
PF07714	Protein tyrosine kinase	25	481	0.0234	ENSP00000251472,ENSP00000259808,ENSP00000270176,ENSP00000275815,ENSP00000288135,ENSP00000291906,ENSP00000311684,ENSP00000343248,ENSP00000346644,ENSP00000354671,ENSP00000355304,ENSP00000355583,ENSP00000356530,ENSP00000358770,ENSP00000362139,ENSP00000375986,ENSP00000381958,ENSP00000387246,ENSP00000389715,ENSP00000391676,ENSP00000400312,ENSP00000408002,ENSP00000411397,ENSP00000427015,ENSP00000464030	EPHA1,EPHA10,IKBKE,JAK3,KIAA1804,KIT,KSR1,KSR2,MAP3K2,MAP3K4,MARK3,MAST1,MAST2,MOK,PKN3,RIPK1,RNASEL,RPS6KA2,RPS6KL1,SBK1,SCYL1,SLK,SPEG,ULK3,VRK2
PF08393	Dynein heavy chain, N-terminal region 2	4	14	0.0234	ENSP00000265104,ENSP00000311273,ENSP00000458355,ENSP00000475939	DNAH11,DNAH2,DNAH5,DNAH7
PF12774	Hydrolytic ATP binding site of dynein motor region D1	4	14	0.0234	ENSP00000265104,ENSP00000311273,ENSP00000458355,ENSP00000475939	DNAH11,DNAH2,DNAH5,DNAH7
PF12775	P-loop containing dynein motor region D3	4	14	0.0234	ENSP00000265104,ENSP00000311273,ENSP00000458355,ENSP00000475939	DNAH11,DNAH2,DNAH5,DNAH7
PF12777	Microtubule-binding stalk of dynein motor	4	14	0.0234	ENSP00000265104,ENSP00000311273,ENSP00000458355,ENSP00000475939	DNAH11,DNAH2,DNAH5,DNAH7
PF12780	P-loop containing dynein motor region D4	4	13	0.0234	ENSP00000265104,ENSP00000311273,ENSP00000458355,ENSP00000475939	DNAH11,DNAH2,DNAH5,DNAH7
PF12781	ATP-binding dynein motor region D5	4	13	0.0234	ENSP00000265104,ENSP00000311273,ENSP00000458355,ENSP00000475939	DNAH11,DNAH2,DNAH5,DNAH7
PF12796	Ankyrin repeats (3 copies)	15	234	0.0234	ENSP00000202556,ENSP00000256707,ENSP00000262126,ENSP00000265140,ENSP00000324287,ENSP00000327009,ENSP00000341957,ENSP00000356530,ENSP00000365255,ENSP00000378338,ENSP00000391950,ENSP00000396747,ENSP00000403302,ENSP00000456953,ENSP00000477725	ACAP2,ANKRD12,ANKRD26,ANKRD32,ANKRD36,ANKRD36C,ANKRD60,CLIP4,GIT1,KANK1,KIDINS220,POTEB2,PPP1R13B,RNASEL,TP53BP2
PF13637	Ankyrin repeats (many copies)	14	207	0.0234	ENSP00000202556,ENSP00000256707,ENSP00000262126,ENSP00000265140,ENSP00000327009,ENSP00000341957,ENSP00000356530,ENSP00000365255,ENSP00000378338,ENSP00000391950,ENSP00000396747,ENSP00000403302,ENSP00000456953,ENSP00000477725	ANKRD12,ANKRD26,ANKRD32,ANKRD36,ANKRD36C,ANKRD60,CLIP4,GIT1,KANK1,KIDINS220,POTEB2,PPP1R13B,RNASEL,TP53BP2
PF13857	Ankyrin repeats (many copies)	13	186	0.0234	ENSP00000202556,ENSP00000256707,ENSP00000262126,ENSP00000265140,ENSP00000324287,ENSP00000341957,ENSP00000356530,ENSP00000365255,ENSP00000391950,ENSP00000396747,ENSP00000403302,ENSP00000456953,ENSP00000477725	ACAP2,ANKRD12,ANKRD26,ANKRD32,ANKRD36,ANKRD36C,ANKRD60,KANK1,KIDINS220,POTEB2,PPP1R13B,RNASEL,TP53BP2
PF14604	Variant SH3 domain	12	153	0.0234	ENSP00000202556,ENSP00000274498,ENSP00000276440,ENSP00000288235,ENSP00000309714,ENSP00000341957,ENSP00000355583,ENSP00000356774,ENSP00000360916,ENSP00000390630,ENSP00000398560,ENSP00000479326	AHI1,ARHGAP26,DOCK5,KIAA1804,MYO1E,PPP1R13B,RIMBP3B,RIMBP3C,SH3PXD2B,SPATA13,TP53BP2,VAV2
PF02141	DENN (AEX-3) domain	4	17	0.0256	ENSP00000310933,ENSP00000354597,ENSP00000370196,ENSP00000373734	DENND4B,DENND5B,MADD,SBF1
PF02463	RecF/RecN/SMC N terminal domain	3	7	0.0256	ENSP00000286398,ENSP00000323421,ENSP00000349961	SMC1A,SMC2,SMC4
PF13476	AAA domain	3	7	0.0256	ENSP00000286398,ENSP00000323421,ENSP00000349961	SMC1A,SMC2,SMC4
PF00271	Helicase conserved C-terminal domain	9	106	0.0309	ENSP00000161863,ENSP00000311135,ENSP00000347232,ENSP00000352678,ENSP00000359454,ENSP00000361232,ENSP00000362441,ENSP00000374213,ENSP00000464050	ATRX,BLM,DDX31,DDX42,DHX37,EP400,HFM1,SUPV3L1,YTHDC2
PF03160	Calx-beta domain	3	8	0.0316	ENSP00000236877,ENSP00000384582,ENSP00000412940	FREM1,GPR98,SLC8A2
PF02759	RUN domain	4	19	0.0318	ENSP00000268989,ENSP00000296137,ENSP00000373734,ENSP00000389913	DENND5B,FYCO1,PLEKHM1,SGSM2
PF00595	PDZ domain (Also known as DHR or GLGF)	10	131	0.0341	ENSP00000251472,ENSP00000264431,ENSP00000296859,ENSP00000304604,ENSP00000354671,ENSP00000371233,ENSP00000378965,ENSP00000379709,ENSP00000385450,ENSP00000439807	ARHGAP21,MAGI1,MAGI3,MAST1,MAST2,MPDZ,RAPGEF2,RAPGEF6,SDCBP2,SNTB1
PF13606	Ankyrin repeat	12	178	0.0341	ENSP00000202556,ENSP00000256707,ENSP00000262126,ENSP00000265140,ENSP00000341957,ENSP00000356530,ENSP00000365255,ENSP00000391950,ENSP00000396747,ENSP00000403302,ENSP00000456953,ENSP00000477725	ANKRD12,ANKRD26,ANKRD32,ANKRD36,ANKRD36C,ANKRD60,KANK1,KIDINS220,POTEB2,PPP1R13B,RNASEL,TP53BP2
PF08385	Dynein heavy chain, N-terminal region 1	3	9	0.0375	ENSP00000265104,ENSP00000458355,ENSP00000475939	DNAH11,DNAH2,DNAH5
PF13768	von Willebrand factor type A domain	4	22	0.046	ENSP00000265379,ENSP00000295550,ENSP00000355180,ENSP00000415769	COL6A1,COL6A3,COL6A5,ITIH3
PF01131	DNA topoisomerase	2	2	0.0462	ENSP00000381773,ENSP00000442336	TOP3A,TOP3B
	Inter Pro
#term ID	term description	observed gene count	background gene count	false discovery rate	matching proteins in your network (IDs)	matching proteins in your network (labels)
IPR027417	P-loop containing nucleoside triphosphate hydrolase	54	849	8.51e-07	ENSP00000161863,ENSP00000245503,ENSP00000261839,ENSP00000262315,ENSP00000262715,ENSP00000263116,ENSP00000265104,ENSP00000265148,ENSP00000267396,ENSP00000286398,ENSP00000288235,ENSP00000297814,ENSP00000303997,ENSP00000304604,ENSP00000306522,ENSP00000311135,ENSP00000311273,ENSP00000313603,ENSP00000320025,ENSP00000323421,ENSP00000331857,ENSP00000347232,ENSP00000348349,ENSP00000349961,ENSP00000350102…	ABCF1,ASPM,ATAD3A,ATRX,BLM,CACNB2,CAMTA1,CENPE,CHTF18,CIITA,DDX11,DDX31,DDX42,DHX37,DNA2,DNAH11,DNAH2,DNAH5,DNAH7,EP400,GTPBP2,HFM1,KIF16B,KIF24,KIF27,LONP1,LRRIQ1,MAGI1,MAGI3,MDN1,MYH11,MYH2,MYH3,MYO10,MYO1E,MYO1H,MYO5A,MYO5C,MYO6,MYO9A,NLRP2,NLRP9,OPA1,RAB36,REM2,SBNO1,SMC1A,SMC2,SMC4,SUPV3L1,TEP1,TOR4A,VCP,YTHDC2
IPR000048	IQ motif, EF-hand binding site	15	81	5.17e-06	ENSP00000245503,ENSP00000261839,ENSP00000283254,ENSP00000288235,ENSP00000306522,ENSP00000346534,ENSP00000348349,ENSP00000356379,ENSP00000376910,ENSP00000379616,ENSP00000382177,ENSP00000386306,ENSP00000421280,ENSP00000439182,ENSP00000464317	ASPM,CAMTA1,LRRIQ1,MYH11,MYH2,MYH3,MYO10,MYO1E,MYO1H,MYO5A,MYO5C,MYO9A,SCN3A,SCN8A,SCN9A
IPR036961	Kinesin motor domain superfamily	14	79	1.75e-05	ENSP00000245503,ENSP00000261839,ENSP00000265148,ENSP00000288235,ENSP00000297814,ENSP00000348349,ENSP00000358994,ENSP00000368464,ENSP00000379616,ENSP00000382177,ENSP00000384164,ENSP00000421280,ENSP00000439182,ENSP00000464317	CENPE,KIF16B,KIF24,KIF27,MYH11,MYH2,MYH3,MYO10,MYO1E,MYO1H,MYO5A,MYO5C,MYO6,MYO9A
IPR001609	Myosin head, motor domain	10	38	4.7e-05	ENSP00000245503,ENSP00000261839,ENSP00000288235,ENSP00000348349,ENSP00000358994,ENSP00000379616,ENSP00000382177,ENSP00000421280,ENSP00000439182,ENSP00000464317	MYH11,MYH2,MYH3,MYO10,MYO1E,MYO1H,MYO5A,MYO5C,MYO6,MYO9A
IPR011993	PH-like domain superfamily	30	408	7.15e-05	ENSP00000007414,ENSP00000171887,ENSP00000247226,ENSP00000251507,ENSP00000262719,ENSP00000263915,ENSP00000265963,ENSP00000274498,ENSP00000288368,ENSP00000298694,ENSP00000324287,ENSP00000331983,ENSP00000335029,ENSP00000337261,ENSP00000349259,ENSP00000354837,ENSP00000360916,ENSP00000361009,ENSP00000362751,ENSP00000370196,ENSP00000378965,ENSP00000379709,ENSP00000386810,ENSP00000389913,ENSP00000398560…	ACAP2,ARHGAP21,ARHGAP26,ARHGEF1,ARHGEF2,ARHGEF40,GRAMD1B,GRB14,GTF2H1,LRRC16A,MYO10,OSBPL7,PHLDB2,PHLPP1,PLEKHG3,PLEKHM1,PREX1,PREX2,RABGAP1,RABGAP1L,RASA3,RGPD4,SBF1,SMEK1,SNTB1,SPATA13,SPTBN1,SPTBN2,TNS1,VAV2
IPR016024	Armadillo-type fold	26	333	0.00013	ENSP00000233099,ENSP00000251691,ENSP00000255882,ENSP00000257430,ENSP00000259335,ENSP00000263710,ENSP00000268876,ENSP00000270176,ENSP00000276440,ENSP00000288670,ENSP00000295888,ENSP00000300648,ENSP00000312442,ENSP00000329219,ENSP00000338512,ENSP00000347719,ENSP00000355541,ENSP00000356379,ENSP00000370744,ENSP00000374409,ENSP00000385722,ENSP00000402515,ENSP00000432768,ENSP00000442318,ENSP00000446184…	AGTPBP1,AP1G2,APC,ASPM,CAND1,CKAP5,CLASP1,DOCK5,FMNL1,FMNL2,GCN1L1,HEATR1,HEATR5B,INTS1,ITPR2,KIAA0368,KIAA1244,PI4KA,PKP4,RRP12,SCYL1,SMEK1,SMG1,TBCD,UNC45B,WDFY3
IPR001849	Pleckstrin homology domain	22	268	0.00037	ENSP00000007414,ENSP00000247226,ENSP00000262719,ENSP00000263915,ENSP00000274498,ENSP00000288368,ENSP00000298694,ENSP00000324287,ENSP00000335029,ENSP00000337261,ENSP00000349259,ENSP00000354837,ENSP00000360916,ENSP00000361009,ENSP00000370196,ENSP00000378965,ENSP00000379709,ENSP00000389913,ENSP00000398560,ENSP00000405405,ENSP00000421280,ENSP00000432568	ACAP2,ARHGAP21,ARHGAP26,ARHGEF1,ARHGEF2,ARHGEF40,GRB14,MYO10,OSBPL7,PHLDB2,PHLPP1,PLEKHG3,PLEKHM1,PREX1,PREX2,RASA3,SBF1,SNTB1,SPATA13,SPTBN1,SPTBN2,VAV2
IPR036872	CH domain superfamily	12	84	0.00045	ENSP00000312671,ENSP00000349238,ENSP00000349259,ENSP00000350719,ENSP00000354573,ENSP00000354923,ENSP00000356379,ENSP00000358866,ENSP00000360916,ENSP00000416015,ENSP00000432568,ENSP00000448955	ASPM,CCDC88B,DMD,EHBP1L1,FLNA,GAS2L3,MACF1,MICAL3,SPTBN1,SPTBN2,SYNE2,VAV2
IPR001715	Calponin homology domain	11	82	0.0018	ENSP00000312671,ENSP00000349259,ENSP00000350719,ENSP00000354573,ENSP00000354923,ENSP00000356379,ENSP00000358866,ENSP00000360916,ENSP00000416015,ENSP00000432568,ENSP00000448955	ASPM,DMD,EHBP1L1,FLNA,GAS2L3,MACF1,MICAL3,SPTBN1,SPTBN2,SYNE2,VAV2
IPR004009	Myosin, N-terminal, SH3-like	6	19	0.0025	ENSP00000245503,ENSP00000261839,ENSP00000358994,ENSP00000379616,ENSP00000382177,ENSP00000464317	MYH11,MYH2,MYH3,MYO5A,MYO5C,MYO6
IPR008989	Myosin S1 fragment, N-terminal	6	20	0.0028	ENSP00000245503,ENSP00000261839,ENSP00000358994,ENSP00000379616,ENSP00000382177,ENSP00000464317	MYH11,MYH2,MYH3,MYO5A,MYO5C,MYO6
IPR001589	Actinin-type actin-binding domain, conserved site	6	23	0.0051	ENSP00000349259,ENSP00000350719,ENSP00000354573,ENSP00000354923,ENSP00000358866,ENSP00000432568	DMD,FLNA,MACF1,SPTBN1,SPTBN2,SYNE2
IPR024583	Voltage-gated Na+ ion channel, cytoplasmic domain	4	6	0.0052	ENSP00000283254,ENSP00000303540,ENSP00000346534,ENSP00000386306	SCN1A,SCN3A,SCN8A,SCN9A
IPR000159	Ras-associating (RA) domain	7	40	0.0091	ENSP00000222145,ENSP00000263915,ENSP00000264431,ENSP00000296859,ENSP00000348349,ENSP00000360431,ENSP00000421280	GRB14,MYO10,MYO9A,PLCE1,RAPGEF2,RAPGEF6,RASIP1
IPR005821	Ion transport domain	11	106	0.0091	ENSP00000283254,ENSP00000288139,ENSP00000303540,ENSP00000304127,ENSP00000346534,ENSP00000354006,ENSP00000356545,ENSP00000370744,ENSP00000381023,ENSP00000385019,ENSP00000386306	CACNA1D,CACNA1E,CACNA1I,ITPR2,KCNG3,SCN1A,SCN3A,SCN8A,SCN9A,TRPM2,TRPM6
IPR026983	Dynein heavy chain	5	16	0.0091	ENSP00000265104,ENSP00000311273,ENSP00000312554,ENSP00000458355,ENSP00000475939	DNAH11,DNAH12,DNAH2,DNAH5,DNAH7
IPR018159	Spectrin/alpha-actinin	6	29	0.0108	ENSP00000301607,ENSP00000349259,ENSP00000350719,ENSP00000354573,ENSP00000354923,ENSP00000432568	DMD,EVPL,MACF1,SPTBN1,SPTBN2,SYNE2
IPR001791	Laminin G domain	8	58	0.0109	ENSP00000265459,ENSP00000359603,ENSP00000362776,ENSP00000363827,ENSP00000406229,ENSP00000422591,ENSP00000424243,ENSP00000432586	COL16A1,COL24A1,EYS,FAT1,FAT3,HSPG2,NRXN2,SLIT2
IPR001452	SH3 domain	16	222	0.0127	ENSP00000202556,ENSP00000274498,ENSP00000276440,ENSP00000288235,ENSP00000301607,ENSP00000309714,ENSP00000320025,ENSP00000340900,ENSP00000341957,ENSP00000354573,ENSP00000355583,ENSP00000356774,ENSP00000360916,ENSP00000390630,ENSP00000398560,ENSP00000479326	AHI1,ARHGAP26,CACNB2,DOCK5,EVPL,KIAA1804,MACF1,MIA3,MYO1E,PPP1R13B,RIMBP3B,RIMBP3C,SH3PXD2B,SPATA13,TP53BP2,VAV2
IPR011009	Protein kinase-like domain superfamily	28	529	0.0127	ENSP00000251472,ENSP00000255882,ENSP00000259808,ENSP00000270176,ENSP00000275815,ENSP00000288135,ENSP00000291906,ENSP00000311684,ENSP00000343248,ENSP00000346644,ENSP00000354006,ENSP00000354671,ENSP00000355304,ENSP00000355583,ENSP00000356530,ENSP00000358770,ENSP00000362139,ENSP00000375986,ENSP00000381958,ENSP00000387246,ENSP00000389715,ENSP00000391676,ENSP00000400312,ENSP00000402515,ENSP00000408002…	EPHA1,EPHA10,IKBKE,JAK3,KIAA1804,KIT,KSR1,KSR2,MAP3K2,MAP3K4,MARK3,MAST1,MAST2,MOK,PI4KA,PKN3,RIPK1,RNASEL,RPS6KA2,RPS6KL1,SBK1,SCYL1,SLK,SMG1,SPEG,TRPM6,ULK3,VRK2
IPR001696	Voltage gated sodium channel, alpha subunit	4	10	0.0141	ENSP00000283254,ENSP00000303540,ENSP00000346534,ENSP00000386306	SCN1A,SCN3A,SCN8A,SCN9A
IPR010526	Sodium ion transport-associated	4	10	0.0141	ENSP00000283254,ENSP00000303540,ENSP00000346534,ENSP00000386306	SCN1A,SCN3A,SCN8A,SCN9A
IPR011989	Armadillo-like helical	14	183	0.0149	ENSP00000233099,ENSP00000257430,ENSP00000259335,ENSP00000263710,ENSP00000268876,ENSP00000270176,ENSP00000300648,ENSP00000312442,ENSP00000338512,ENSP00000347719,ENSP00000355541,ENSP00000374409,ENSP00000432768,ENSP00000442318	AGTPBP1,AP1G2,APC,CAND1,CKAP5,CLASP1,GCN1L1,HEATR1,HEATR5B,KIAA0368,PKP4,SCYL1,TBCD,UNC45B
IPR002017	Spectrin repeat	5	22	0.0186	ENSP00000349259,ENSP00000350719,ENSP00000354573,ENSP00000354923,ENSP00000432568	DMD,MACF1,SPTBN1,SPTBN2,SYNE2
IPR002110	Ankyrin repeat	16	240	0.0223	ENSP00000161863,ENSP00000202556,ENSP00000256707,ENSP00000262126,ENSP00000265140,ENSP00000306522,ENSP00000324287,ENSP00000327009,ENSP00000341957,ENSP00000356530,ENSP00000365255,ENSP00000378338,ENSP00000391950,ENSP00000396747,ENSP00000403302,ENSP00000477725	ACAP2,ANKRD12,ANKRD26,ANKRD32,ANKRD36,ANKRD36C,ANKRD60,CAMTA1,CLIP4,GIT1,KANK1,KIDINS220,PPP1R13B,RNASEL,TP53BP2,YTHDC2
IPR000219	Dbl homology (DH) domain	8	71	0.0239	ENSP00000247226,ENSP00000288368,ENSP00000298694,ENSP00000337261,ENSP00000354837,ENSP00000360916,ENSP00000361009,ENSP00000398560	ARHGEF1,ARHGEF2,ARHGEF40,PLEKHG3,PREX1,PREX2,SPATA13,VAV2
IPR000719	Protein kinase domain	25	485	0.0239	ENSP00000251472,ENSP00000259808,ENSP00000270176,ENSP00000275815,ENSP00000288135,ENSP00000291906,ENSP00000311684,ENSP00000343248,ENSP00000346644,ENSP00000354671,ENSP00000355304,ENSP00000355583,ENSP00000356530,ENSP00000358770,ENSP00000362139,ENSP00000375986,ENSP00000381958,ENSP00000387246,ENSP00000389715,ENSP00000391676,ENSP00000400312,ENSP00000408002,ENSP00000411397,ENSP00000427015,ENSP00000464030	EPHA1,EPHA10,IKBKE,JAK3,KIAA1804,KIT,KSR1,KSR2,MAP3K2,MAP3K4,MARK3,MAST1,MAST2,MOK,PKN3,RIPK1,RNASEL,RPS6KA2,RPS6KL1,SBK1,SCYL1,SLK,SPEG,ULK3,VRK2
IPR001478	PDZ domain	12	150	0.0239	ENSP00000251472,ENSP00000264431,ENSP00000288368,ENSP00000296859,ENSP00000304604,ENSP00000354671,ENSP00000361009,ENSP00000371233,ENSP00000378965,ENSP00000379709,ENSP00000385450,ENSP00000439807	ARHGAP21,MAGI1,MAGI3,MAST1,MAST2,MPDZ,PREX1,PREX2,RAPGEF2,RAPGEF6,SDCBP2,SNTB1
IPR003593	AAA+ ATPase domain	11	134	0.0239	ENSP00000262315,ENSP00000265104,ENSP00000311273,ENSP00000313603,ENSP00000350102,ENSP00000351777,ENSP00000353826,ENSP00000358400,ENSP00000368030,ENSP00000458355,ENSP00000475939	ABCF1,ATAD3A,CHTF18,DNAH11,DNAH2,DNAH5,DNAH7,LONP1,MDN1,TOR4A,VCP
IPR004273	Dynein heavy chain region D6 P-loop domain	4	14	0.0239	ENSP00000265104,ENSP00000311273,ENSP00000458355,ENSP00000475939	DNAH11,DNAH2,DNAH5,DNAH7
IPR005113	uDENN domain	4	15	0.0239	ENSP00000310933,ENSP00000354597,ENSP00000370196,ENSP00000373734	DENND4B,DENND5B,MADD,SBF1
IPR008160	Collagen triple helix repeat	8	76	0.0239	ENSP00000225964,ENSP00000262101,ENSP00000265379,ENSP00000295550,ENSP00000335196,ENSP00000355180,ENSP00000359603,ENSP00000362776	COL16A1,COL1A1,COL24A1,COL6A1,COL6A3,COL6A5,GLDN,MSR1
IPR011704	ATPase, dynein-related, AAA domain	4	13	0.0239	ENSP00000265104,ENSP00000358400,ENSP00000458355,ENSP00000475939	DNAH11,DNAH2,DNAH5,MDN1
IPR013602	Dynein heavy chain, domain-2	4	14	0.0239	ENSP00000265104,ENSP00000311273,ENSP00000458355,ENSP00000475939	DNAH11,DNAH2,DNAH5,DNAH7
IPR020683	Ankyrin repeat-containing domain	16	248	0.0239	ENSP00000161863,ENSP00000202556,ENSP00000256707,ENSP00000262126,ENSP00000265140,ENSP00000306522,ENSP00000324287,ENSP00000327009,ENSP00000341957,ENSP00000356530,ENSP00000365255,ENSP00000378338,ENSP00000391950,ENSP00000396747,ENSP00000403302,ENSP00000477725	ACAP2,ANKRD12,ANKRD26,ANKRD32,ANKRD36,ANKRD36C,ANKRD60,CAMTA1,CLIP4,GIT1,KANK1,KIDINS220,PPP1R13B,RNASEL,TP53BP2,YTHDC2
IPR024317	Dynein heavy chain, AAA module D4	4	13	0.0239	ENSP00000265104,ENSP00000311273,ENSP00000458355,ENSP00000475939	DNAH11,DNAH2,DNAH5,DNAH7
IPR024704	Structural maintenance of chromosomes protein	3	5	0.0239	ENSP00000286398,ENSP00000323421,ENSP00000349961	SMC1A,SMC2,SMC4
IPR024743	Dynein heavy chain, coiled coil stalk	4	14	0.0239	ENSP00000265104,ENSP00000311273,ENSP00000458355,ENSP00000475939	DNAH11,DNAH2,DNAH5,DNAH7
IPR027359	Voltage-dependent channel domain superfamily	8	70	0.0239	ENSP00000283254,ENSP00000288139,ENSP00000303540,ENSP00000304127,ENSP00000346534,ENSP00000356545,ENSP00000385019,ENSP00000386306	CACNA1D,CACNA1E,CACNA1I,KCNG3,SCN1A,SCN3A,SCN8A,SCN9A
IPR035699	Dynein heavy chain, hydrolytic ATP-binding dynein motor region	4	14	0.0239	ENSP00000265104,ENSP00000311273,ENSP00000458355,ENSP00000475939	DNAH11,DNAH2,DNAH5,DNAH7
IPR035706	Dynein heavy chain, ATP-binding dynein motor region	4	13	0.0239	ENSP00000265104,ENSP00000311273,ENSP00000458355,ENSP00000475939	DNAH11,DNAH2,DNAH5,DNAH7
IPR035899	Dbl homology (DH) domain superfamily	8	72	0.0239	ENSP00000247226,ENSP00000288368,ENSP00000298694,ENSP00000337261,ENSP00000354837,ENSP00000360916,ENSP00000361009,ENSP00000398560	ARHGEF1,ARHGEF2,ARHGEF40,PLEKHG3,PREX1,PREX2,SPATA13,VAV2
IPR036034	PDZ superfamily	12	151	0.0239	ENSP00000251472,ENSP00000264431,ENSP00000288368,ENSP00000296859,ENSP00000304604,ENSP00000354671,ENSP00000361009,ENSP00000371233,ENSP00000378965,ENSP00000379709,ENSP00000385450,ENSP00000439807	ARHGAP21,MAGI1,MAGI3,MAST1,MAST2,MPDZ,PREX1,PREX2,RAPGEF2,RAPGEF6,SDCBP2,SNTB1
IPR036770	Ankyrin repeat-containing domain superfamily	16	251	0.0239	ENSP00000161863,ENSP00000202556,ENSP00000256707,ENSP00000262126,ENSP00000265140,ENSP00000306522,ENSP00000324287,ENSP00000327009,ENSP00000341957,ENSP00000356530,ENSP00000365255,ENSP00000378338,ENSP00000391950,ENSP00000396747,ENSP00000403302,ENSP00000477725	ACAP2,ANKRD12,ANKRD26,ANKRD32,ANKRD36,ANKRD36C,ANKRD60,CAMTA1,CLIP4,GIT1,KANK1,KIDINS220,PPP1R13B,RNASEL,TP53BP2,YTHDC2
IPR002710	Dilute domain	3	6	0.025	ENSP00000222145,ENSP00000261839,ENSP00000382177	MYO5A,MYO5C,RASIP1
IPR003395	RecF/RecN/SMC, N-terminal	3	6	0.025	ENSP00000286398,ENSP00000323421,ENSP00000349961	SMC1A,SMC2,SMC4
IPR010935	SMCs flexible hinge	3	6	0.025	ENSP00000286398,ENSP00000323421,ENSP00000349961	SMC1A,SMC2,SMC4
IPR036277	SMCs flexible hinge superfamily	3	6	0.025	ENSP00000286398,ENSP00000323421,ENSP00000349961	SMC1A,SMC2,SMC4
IPR001194	cDENN domain	4	16	0.0261	ENSP00000310933,ENSP00000354597,ENSP00000370196,ENSP00000373734	DENND4B,DENND5B,MADD,SBF1
IPR005112	dDENN domain	4	16	0.0261	ENSP00000310933,ENSP00000354597,ENSP00000370196,ENSP00000373734	DENND4B,DENND5B,MADD,SBF1
IPR036028	SH3-like domain superfamily	14	212	0.0261	ENSP00000202556,ENSP00000274498,ENSP00000276440,ENSP00000288235,ENSP00000309714,ENSP00000320025,ENSP00000340900,ENSP00000341957,ENSP00000355583,ENSP00000356774,ENSP00000360916,ENSP00000390630,ENSP00000398560,ENSP00000479326	AHI1,ARHGAP26,CACNB2,DOCK5,KIAA1804,MIA3,MYO1E,PPP1R13B,RIMBP3B,RIMBP3C,SH3PXD2B,SPATA13,TP53BP2,VAV2
IPR001680	WD40 repeat	16	269	0.033	ENSP00000254029,ENSP00000262715,ENSP00000264515,ENSP00000287380,ENSP00000295888,ENSP00000317971,ENSP00000344562,ENSP00000356774,ENSP00000371101,ENSP00000376333,ENSP00000377428,ENSP00000384792,ENSP00000404704,ENSP00000406012,ENSP00000415556,ENSP00000439479	AHI1,CFAP44,CORO6,DCAF11,DMXL1,IFT140,LLGL2,NOL10,RBBP5,TBC1D31,TEP1,VPS8,WDFY3,WDR44,WDR62,WDTC1
IPR002219	Protein kinase C-like, phorbol ester/diacylglycerol-binding domain	7	64	0.033	ENSP00000348349,ENSP00000354837,ENSP00000360916,ENSP00000381958,ENSP00000389715,ENSP00000389913,ENSP00000429562	ARHGEF2,KSR1,KSR2,MYO9A,PLEKHM1,UNC13A,VAV2
IPR001650	Helicase, C-terminal	9	107	0.0399	ENSP00000161863,ENSP00000311135,ENSP00000347232,ENSP00000352678,ENSP00000359454,ENSP00000361232,ENSP00000362441,ENSP00000374213,ENSP00000464050	ATRX,BLM,DDX31,DDX42,DHX37,EP400,HFM1,SUPV3L1,YTHDC2
IPR004012	RUN domain	4	19	0.0401	ENSP00000268989,ENSP00000296137,ENSP00000373734,ENSP00000389913	DENND5B,FYCO1,PLEKHM1,SGSM2
IPR037213	RUN domain superfamily	4	19	0.0401	ENSP00000268989,ENSP00000296137,ENSP00000373734,ENSP00000389913	DENND5B,FYCO1,PLEKHM1,SGSM2
IPR003961	Fibronectin type III	13	203	0.0443	ENSP00000262113,ENSP00000275815,ENSP00000295550,ENSP00000311684,ENSP00000346839,ENSP00000362139,ENSP00000363557,ENSP00000376421,ENSP00000383392,ENSP00000385636,ENSP00000390630,ENSP00000394770,ENSP00000479326	CMYA5,COL6A3,EPHA1,EPHA10,FN1,MYOM2,MYOM3,NCAM2,OBSL1,RIMBP3B,RIMBP3C,SDK2,SPEG
IPR011011	Zinc finger, FYVE/PHD-type	10	132	0.0443	ENSP00000266070,ENSP00000295888,ENSP00000296137,ENSP00000362441,ENSP00000370710,ENSP00000376534,ENSP00000378784,ENSP00000387266,ENSP00000436786,ENSP00000479617	ATRX,BAZ2B,DIDO1,FYCO1,JMJD2C,KMT2A,PHF20L1,SPIRE1,UHRF1,WDFY3
IPR036116	Fibronectin type III superfamily	13	204	0.0445	ENSP00000262113,ENSP00000275815,ENSP00000295550,ENSP00000311684,ENSP00000346839,ENSP00000362139,ENSP00000363557,ENSP00000376421,ENSP00000383392,ENSP00000385636,ENSP00000390630,ENSP00000394770,ENSP00000479326	CMYA5,COL6A3,EPHA1,EPHA10,FN1,MYOM2,MYOM3,NCAM2,OBSL1,RIMBP3B,RIMBP3C,SDK2,SPEG
IPR003644	Na-Ca exchanger/integrin-beta4	3	9	0.0466	ENSP00000236877,ENSP00000384582,ENSP00000412940	FREM1,GPR98,SLC8A2
IPR013594	Dynein heavy chain, domain-1	3	9	0.0466	ENSP00000265104,ENSP00000458355,ENSP00000475939	DNAH11,DNAH2,DNAH5
IPR038081	CalX-like domain superfamily	3	9	0.0466	ENSP00000236877,ENSP00000384582,ENSP00000412940	FREM1,GPR98,SLC8A2
IPR036322	WD40-repeat-containing domain superfamily	16	285	0.0475	ENSP00000254029,ENSP00000262715,ENSP00000287380,ENSP00000295888,ENSP00000317971,ENSP00000344562,ENSP00000356774,ENSP00000371101,ENSP00000376333,ENSP00000377428,ENSP00000384792,ENSP00000404704,ENSP00000406012,ENSP00000415556,ENSP00000424226,ENSP00000439479	AHI1,CFAP44,CORO6,DCAF11,DMXL1,IFT140,LLGL2,NOL10,TBC1D31,TENM3,TEP1,VPS8,WDFY3,WDR44,WDR62,WDTC1
IPR037516	Tripartite DENN domain	4	21	0.0475	ENSP00000310933,ENSP00000354597,ENSP00000370196,ENSP00000373734	DENND4B,DENND5B,MADD,SBF1
	SMART
#term ID	term description	observed gene count	background gene count	false discovery rate	matching proteins in your network (IDs)	matching proteins in your network (labels)
SM00015	Short calmodulin-binding motif containing conserved Ile and Gln residues.	16	83	5.03e-07	ENSP00000245503,ENSP00000261839,ENSP00000283254,ENSP00000303540,ENSP00000306522,ENSP00000346534,ENSP00000348349,ENSP00000356379,ENSP00000358994,ENSP00000376910,ENSP00000379616,ENSP00000382177,ENSP00000386306,ENSP00000421280,ENSP00000439182,ENSP00000464317	ASPM,CAMTA1,LRRIQ1,MYH11,MYH2,MYH3,MYO10,MYO1H,MYO5A,MYO5C,MYO6,MYO9A,SCN1A,SCN3A,SCN8A,SCN9A
SM00242	Myosin. Large ATPases.	10	38	2.38e-05	ENSP00000245503,ENSP00000261839,ENSP00000288235,ENSP00000348349,ENSP00000358994,ENSP00000379616,ENSP00000382177,ENSP00000421280,ENSP00000439182,ENSP00000464317	MYH11,MYH2,MYH3,MYO10,MYO1E,MYO1H,MYO5A,MYO5C,MYO6,MYO9A
SM00033	Calponin homology domain	11	64	0.00012	ENSP00000312671,ENSP00000349259,ENSP00000350719,ENSP00000354573,ENSP00000354923,ENSP00000356379,ENSP00000358866,ENSP00000360916,ENSP00000416015,ENSP00000432568,ENSP00000448955	ASPM,DMD,EHBP1L1,FLNA,GAS2L3,MACF1,MICAL3,SPTBN1,SPTBN2,SYNE2,VAV2
SM00233	Pleckstrin homology domain.	23	279	0.00012	ENSP00000007414,ENSP00000247226,ENSP00000258991,ENSP00000262719,ENSP00000263915,ENSP00000274498,ENSP00000288368,ENSP00000298694,ENSP00000324287,ENSP00000335029,ENSP00000337261,ENSP00000349259,ENSP00000354837,ENSP00000360916,ENSP00000361009,ENSP00000370196,ENSP00000378965,ENSP00000379709,ENSP00000389913,ENSP00000398560,ENSP00000405405,ENSP00000421280,ENSP00000432568	ACAP2,ARHGAP21,ARHGAP26,ARHGEF1,ARHGEF2,ARHGEF40,GRB14,MYO10,OSBPL7,PHLDB2,PHLPP1,PLEKHG3,PLEKHM1,PREX1,PREX2,RASA3,SBF1,SNTB1,SPATA13,SPTBN1,SPTBN2,TEX2,VAV2
SM00150	Spectrin repeats	7	33	0.0023	ENSP00000301607,ENSP00000349259,ENSP00000350719,ENSP00000354573,ENSP00000354923,ENSP00000395995,ENSP00000432568	CCDC141,DMD,EVPL,MACF1,SPTBN1,SPTBN2,SYNE2
SM00314	Ras association (RalGDS/AF-6) domain	6	32	0.0124	ENSP00000222145,ENSP00000263915,ENSP00000264431,ENSP00000296859,ENSP00000348349,ENSP00000360431	GRB14,MYO9A,PLCE1,RAPGEF2,RAPGEF6,RASIP1
SM00248	ankyrin repeats	17	255	0.0136	ENSP00000161863,ENSP00000202556,ENSP00000256707,ENSP00000262126,ENSP00000265140,ENSP00000306522,ENSP00000324287,ENSP00000327009,ENSP00000341957,ENSP00000356530,ENSP00000365255,ENSP00000378338,ENSP00000391950,ENSP00000396747,ENSP00000403302,ENSP00000456953,ENSP00000477725	ACAP2,ANKRD12,ANKRD26,ANKRD32,ANKRD36,ANKRD36C,ANKRD60,CAMTA1,CLIP4,GIT1,KANK1,KIDINS220,POTEB2,PPP1R13B,RNASEL,TP53BP2,YTHDC2
SM00228	Domain present in PSD-95, Dlg, and ZO-1/2.	12	148	0.0176	ENSP00000251472,ENSP00000264431,ENSP00000288368,ENSP00000296859,ENSP00000304604,ENSP00000354671,ENSP00000361009,ENSP00000371233,ENSP00000378965,ENSP00000379709,ENSP00000385450,ENSP00000439807	ARHGAP21,MAGI1,MAGI3,MAST1,MAST2,MPDZ,PREX1,PREX2,RAPGEF2,RAPGEF6,SDCBP2,SNTB1
SM00001	EGF domain, unclasssified subfamily	8	76	0.0286	ENSP00000263816,ENSP00000363827,ENSP00000374135,ENSP00000392423,ENSP00000406229,ENSP00000424226,ENSP00000424243,ENSP00000432586	EYS,FAT1,FAT3,HSPG2,LRP1B,LRP2,RELN,TENM3
SM00060	Fibronectin type 3 domain	13	189	0.0286	ENSP00000262113,ENSP00000275815,ENSP00000295550,ENSP00000311684,ENSP00000346839,ENSP00000362139,ENSP00000363557,ENSP00000376421,ENSP00000383392,ENSP00000385636,ENSP00000390630,ENSP00000394770,ENSP00000479326	CMYA5,COL6A3,EPHA1,EPHA10,FN1,MYOM2,MYOM3,NCAM2,OBSL1,RIMBP3B,RIMBP3C,SDK2,SPEG
SM00109	Protein kinase C conserved region 1 (C1) domains (Cysteine-rich domains)	7	65	0.0286	ENSP00000348349,ENSP00000354837,ENSP00000360916,ENSP00000381958,ENSP00000389715,ENSP00000389913,ENSP00000429562	ARHGEF2,KSR1,KSR2,MYO9A,PLEKHM1,UNC13A,VAV2
SM00181	Epidermal growth factor-like domain.	14	208	0.0286	ENSP00000263816,ENSP00000265459,ENSP00000325527,ENSP00000363827,ENSP00000371532,ENSP00000374135,ENSP00000387356,ENSP00000392423,ENSP00000406229,ENSP00000422591,ENSP00000424226,ENSP00000424243,ENSP00000432586,ENSP00000483469	ACAN,EYS,FAT1,FAT3,FBN1,GPR179,HSPG2,LRP1B,LRP2,NRXN2,RELN,SLIT2,TENM3,VLDLR
SM00282	Laminin G domain	6	44	0.0286	ENSP00000265459,ENSP00000363827,ENSP00000406229,ENSP00000422591,ENSP00000424243,ENSP00000432586	EYS,FAT1,FAT3,HSPG2,NRXN2,SLIT2
SM00326	Src homology 3 domains	14	215	0.0286	ENSP00000202556,ENSP00000274498,ENSP00000276440,ENSP00000288235,ENSP00000309714,ENSP00000320025,ENSP00000340900,ENSP00000341957,ENSP00000355583,ENSP00000356774,ENSP00000360916,ENSP00000390630,ENSP00000398560,ENSP00000479326	AHI1,ARHGAP26,CACNB2,DOCK5,KIAA1804,MIA3,MYO1E,PPP1R13B,RIMBP3B,RIMBP3C,SH3PXD2B,SPATA13,TP53BP2,VAV2
SM00382	ATPases associated with a variety of cellular activities	11	144	0.0286	ENSP00000262315,ENSP00000265104,ENSP00000311273,ENSP00000313603,ENSP00000350102,ENSP00000351777,ENSP00000353826,ENSP00000358400,ENSP00000368030,ENSP00000458355,ENSP00000475939	ABCF1,ATAD3A,CHTF18,DNAH11,DNAH2,DNAH5,DNAH7,LONP1,MDN1,TOR4A,VCP
SM00799	Domain found in a variety of signalling proteins, always encircled by uDENN and dDENN	4	16	0.0286	ENSP00000310933,ENSP00000354597,ENSP00000370196,ENSP00000373734	DENND4B,DENND5B,MADD,SBF1
SM00800	Domain always found upstream of DENN domain, found in a variety of signalling proteins	4	15	0.0286	ENSP00000310933,ENSP00000354597,ENSP00000370196,ENSP00000373734	DENND4B,DENND5B,MADD,SBF1
SM00801	Domain always found downstream of DENN domain, found in a variety of signalling proteins	4	16	0.0286	ENSP00000310933,ENSP00000354597,ENSP00000370196,ENSP00000373734	DENND4B,DENND5B,MADD,SBF1
SM00968	SMC proteins Flexible Hinge Domain	3	6	0.0286	ENSP00000286398,ENSP00000323421,ENSP00000349961	SMC1A,SMC2,SMC4
SM01132	The DIL domain has no known function.	3	6	0.0286	ENSP00000222145,ENSP00000261839,ENSP00000382177	MYO5A,MYO5C,RASIP1
SM00436	Bacterial DNA topoisomeraes I ATP-binding domain	2	2	0.0434	ENSP00000381773,ENSP00000442336	TOP3A,TOP3B
SM00437	Bacterial DNA topoisomerase I DNA-binding domain	2	2	0.0434	ENSP00000381773,ENSP00000442336	TOP3A,TOP3B
SM00493	topoisomerases, DnaG-type primases, OLD family nucleases and RecR proteins	2	2	0.0434	ENSP00000381773,ENSP00000442336	TOP3A,TOP3B
SM00179	Calcium-binding EGF-like domain	8	98	0.0469	ENSP00000263816,ENSP00000325527,ENSP00000371532,ENSP00000374135,ENSP00000406229,ENSP00000422591,ENSP00000424243,ENSP00000432586	EYS,FAT1,FAT3,FBN1,LRP1B,LRP2,SLIT2,VLDLR
