# Supplementary material for: The plasma peptides of sepsis
Source: Clin Proteomics. 2020 Jul 2;17:26. doi: 10.1186/s12014-020-09288-5 (PMC7331219; doi:10.1186/s12014-020-09288-5)
Supplement: Supplementary file 2 — Additional file 2: Table S2. The tryptic phosphopeptides with Chi square FDR q-values. [file 12014_2020_9288_MOESM2_ESM.xlsx]

## Sheet: Sheet1
STYP_Gene_Symbol	STYP_X2	Gene_Symbol_n	p-value	q-value
POM121C	324	1	1e-05	1.55056e-05
SCN8A	273	4	1e-05	1.55056e-05
TMED8	156.5	2	1e-05	1.55056e-05
NSUN7	132.5	2	1e-05	1.55056e-05
SLX4	127.923	1	1e-05	1.55056e-05
MADD	121.134	26	1e-05	1.55056e-05
DNLZ	121	1	1e-05	1.55056e-05
PDE3B	107	3	1e-05	1.55056e-05
UTY	105.573	57	1e-05	1.55056e-05
SAA2	103.126	1	1e-05	1.55056e-05
DEPDC7	100	2	1e-05	1.55056e-05
MTX1	100	1	1e-05	1.55056e-05
MYO1E	100	1	1e-05	1.55056e-05
RXRB	90.5421	6	1e-05	1.55056e-05
SYDE1	84.1978	4	1e-05	1.55056e-05
SAA1	71.009	4	1e-05	1.55056e-05
FN1	67.4771	28	1e-05	1.55056e-05
PUS7L	64.2289	3	1e-05	1.55056e-05
FYCO1	63.5604	3	1e-05	1.55056e-05
USP26	59.8487	2	1e-05	1.55056e-05
ACAP2	55.515	3	1e-05	1.55056e-05
AHI1	55.515	1	1e-05	1.55056e-05
DKFZp686O12165	55.515	1	1e-05	1.55056e-05
KSR2	55.515	3	1e-05	1.55056e-05
LMAN1	55.515	1	1e-05	1.55056e-05
ZNF280D	55.2286	9	1e-05	1.55056e-05
SLC8A2	50.9292	2	1e-05	1.55056e-05
ITPR2	49.8472	2	1e-05	1.55056e-05
GPHN	49.7827	8	1e-05	1.55056e-05
HES6	48.6488	1	1e-05	1.55056e-05
OSBPL7	48.5663	3	1e-05	1.55056e-05
TRPM6	47.2049	8	1e-05	1.55056e-05
MSR1	46.6743	5	1e-05	1.55056e-05
C17orf25	46.3433	1	1e-05	1.55056e-05
GPHRYN	46.3433	1	1e-05	1.55056e-05
MYH11	46.3433	1	1e-05	1.55056e-05
RABGAP1	46.3433	2	1e-05	1.55056e-05
SNTB1	46.3433	1	1e-05	1.55056e-05
TP53BP2	46.3433	1	1e-05	1.55056e-05
VIPAS39	46.3433	3	1e-05	1.55056e-05
CIC/DUX4	45.2188	1	1e-05	1.55056e-05
LSM4	45.2188	2	1e-05	1.55056e-05
ZNF316	45.2188	1	1e-05	1.55056e-05
SYNE2	44.8545	10	1e-05	1.55056e-05
SMC1A	42.3075	3	1e-05	1.55056e-05
MLLT1	42.1712	2	1e-05	1.55056e-05
CWC15	41.9148	2	1e-05	1.55056e-05
GPR124	40.188	3	1e-05	1.55056e-05
TTC21A	39.8839	11	1e-05	1.55056e-05
TROPH	39.7692	1	1e-05	1.55056e-05
BRCA1	39.3619	14	1e-05	1.55056e-05
SPTBN2	38.6108	1	1e-05	1.55056e-05
ABCF1	38.2233	3	1e-05	1.55056e-05
LRRC48	38.2012	3	1e-05	1.55056e-05
POLR1B	38.0292	7	1e-05	1.55056e-05
DKFZp686J22257	37.9992	1	1e-05	1.55056e-05
DOCK5	37.9992	1	1e-05	1.55056e-05
EYA2	37.9992	1	1e-05	1.55056e-05
FMNL2	37.9992	1	1e-05	1.55056e-05
HIRIP3	37.9992	1	1e-05	1.55056e-05
HLA-DRB1	37.9992	1	1e-05	1.55056e-05
KIT	37.9992	5	1e-05	1.55056e-05
KSR1	37.9992	1	1e-05	1.55056e-05
LOC100508782	37.9992	1	1e-05	1.55056e-05
LONP1	37.9992	1	1e-05	1.55056e-05
NLRP9	37.9992	2	1e-05	1.55056e-05
PLEKHM1	37.9992	2	1e-05	1.55056e-05
PTPN7	37.9992	1	1e-05	1.55056e-05
THOP1	37.9992	2	1e-05	1.55056e-05
TNS1	37.9992	1	1e-05	1.55056e-05
VRK2	37.9992	5	1e-05	1.55056e-05
ZNF675	37.9992	2	1e-05	1.55056e-05
CEP170B	37.1197	5	1e-05	1.55056e-05
ARHGEF2	36.2543	14	1e-05	1.55056e-05
FRY	36.1226	2	1e-05	1.55056e-05
FGFR2-BICC1	36.0191	1	1e-05	1.55056e-05
LY75	36.0062	1	1e-05	1.55056e-05
PDZGEF1	36.0062	1	1e-05	1.55056e-05
BICC1	35.7269	6	1e-05	1.55056e-05
RAPGEF2	35.4454	9	1e-05	1.55056e-05
CIC	35.3763	5	1e-05	1.55056e-05
HEXA-AS1	35.2605	1	1e-05	1.55056e-05
MAP2	34.7925	7	1e-05	1.55056e-05
CMYA5	33.3522	1	1e-05	1.55056e-05
PIBF1	32.5245	1	1e-05	1.55056e-05
PXDN	32.5245	3	1e-05	1.55056e-05
FZD8	30.9592	1	1e-05	1.55056e-05
AHDC1	30.8111	1	1e-05	1.55056e-05
SHE	27.8485	3	1e-05	1.55056e-05
EVPL	27.6514	3	1e-05	1.55056e-05
ARHGAP26	27.5913	8	1e-05	1.55056e-05
ADAMTSL1	27.5211	1	1e-05	1.55056e-05
MAP3K2	27.5211	1	1e-05	1.55056e-05
ANKRD60	26.9599	1	1e-05	1.55056e-05
CCDC30	26.9599	1	1e-05	1.55056e-05
CHGB	26.9599	1	1e-05	1.55056e-05
CNTROB	26.9599	1	1e-05	1.55056e-05
COX16	26.9599	1	1e-05	1.55056e-05
DCDC2C	26.9599	2	1e-05	1.55056e-05
DISC1	26.9599	1	1e-05	1.55056e-05
LOC100996720	26.9599	1	1e-05	1.55056e-05
LOC730256	26.9599	1	1e-05	1.55056e-05
TRIM2	26.9599	8	1e-05	1.55056e-05
DMD	26.3795	12	1e-05	1.55056e-05
AKAP3	26.2932	1	1e-05	1.55056e-05
FHDC1	26.2932	1	1e-05	1.55056e-05
DNAH2	26.2589	1	1e-05	1.55056e-05
XIRP2	25.759	3	1e-05	1.55056e-05
EPS15L1	25.222	8	1e-05	1.55056e-05
AMOTL1	25.1795	7	1e-05	1.55056e-05
HMGXB3	24.4384	2	1e-05	1.55056e-05
NOL10	24.4384	4	1e-05	1.55056e-05
FAN1	24.0953	3	1e-05	1.55056e-05
CKAP5	23.9847	2	1e-05	1.55056e-05
NEDD4L	23.598	6	1e-05	1.55056e-05
USP31	23.4278	2	1e-05	1.55056e-05
SCYL1	23.246	4	1e-05	1.55056e-05
ARHGEF40	22.9258	2	1e-05	1.55056e-05
LOC100653137	22.8122	3	1e-05	1.55056e-05
TOP3B	22.7779	2	1e-05	1.55056e-05
MOK	22.5318	2	1e-05	1.55056e-05
MAGI1	22.3373	15	1e-05	1.55056e-05
PLEKHG3	22.203	7	1e-05	1.55056e-05
CEP350	22.1265	7	1e-05	1.55056e-05
DHX37	22.008	2	1e-05	1.55056e-05
FUS	22.008	5	1e-05	1.55056e-05
GRB14	22.008	1	1e-05	1.55056e-05
HNRPR	22.008	1	1e-05	1.55056e-05
MIS18BP1	22.008	1	1e-05	1.55056e-05
RABGAP1L	22.008	2	1e-05	1.55056e-05
VLDLR	22.008	4	1e-05	1.55056e-05
CDH23	21.9248	4	1e-05	1.55056e-05
ACHE	21.917	1	1e-05	1.55056e-05
ARHGEF1	21.917	2	1e-05	1.55056e-05
COL6A1	21.917	2	1e-05	1.55056e-05
CYB5R1	21.917	2	1e-05	1.55056e-05
HECTD3	21.917	1	1e-05	1.55056e-05
LOC101927662	21.917	1	1e-05	1.55056e-05
LOC102725184	21.917	1	1e-05	1.55056e-05
NCAM2	21.917	1	1e-05	1.55056e-05
PDE1A	21.917	1	1e-05	1.55056e-05
RAB36	21.917	1	1e-05	1.55056e-05
SCN1A	21.917	3	1e-05	1.55056e-05
TBCD	21.917	1	1e-05	1.55056e-05
TCEAL4	21.917	1	1e-05	1.55056e-05
ZNF66	21.917	1	1e-05	1.55056e-05
AP1G2	21.543	9	1e-05	1.55056e-05
SLK	21.0375	2	1e-05	1.55056e-05
ZFAT	20.9637	4	1e-05	1.55056e-05
HSD17B12	20.8829	3	1e-05	1.55056e-05
MYH3	20.8352	1	1e-05	1.55056e-05
PCYT2	20.821	7	1e-05	1.55056e-05
ASPM	20.6022	5	1e-05	1.55056e-05
TTC3	20.5907	8	1e-05	1.55056e-05
APC	20.4467	3	1e-05	1.55056e-05
AGTPBP1	20.0559	2	1e-05	1.55056e-05
RBBP5	19.7775	4	1e-05	1.55056e-05
DENND4B	19.544	5	1e-05	1.55056e-05
HNRNPR	19.2627	1	1e-05	1.55056e-05
SCN3A	19.2627	4	1e-05	1.55056e-05
POLR1A	19.0266	3	1e-05	1.55056e-05
FMNL1	18.9978	3	1e-05	1.55056e-05
CCDC149	18.1038	2	1e-05	1.55056e-05
CEP85L	18.1038	3	1e-05	1.55056e-05
ESYT2	18.1038	1	1e-05	1.55056e-05
FAM178A	18.1038	1	1e-05	1.55056e-05
PTPRA	18.1038	3	1e-05	1.55056e-05
RPL4	18.1038	1	1e-05	1.55056e-05
SPIRE1	18.1038	3	1e-05	1.55056e-05
KDM4C	17.7932	3	1e-05	1.55056e-05
CANT1	17.638	2	1e-05	1.55056e-05
FBXO41	17.5639	1	1e-05	1.55056e-05
APOL5	17.5358	2	1e-05	1.55056e-05
KIAA0368	17.4367	1	1e-05	1.55056e-05
MORC2	17.1857	3	1e-05	1.55056e-05
KAZN	16.6326	2	0.0001	0.000144503
KIAA1671	16.4433	1	0.0001	0.000144503
KIF16B	16.4433	3	0.0001	0.000144503
LRP1B	16.4433	1	0.0001	0.000144503
MAP3K4	16.4433	6	0.0001	0.000144503
RRBP1	16.2597	3	0.0001	0.000144503
EHBP1L1	16.1775	3	0.0001	0.000144503
CCDC38	16.0132	1	0.0001	0.000144503
DDX42	16.0132	1	0.0001	0.000144503
DKFZp686J1895	16.0132	1	0.0001	0.000144503
FER1L5	16.0132	1	0.0001	0.000144503
INTS3	16.0132	1	0.0001	0.000144503
NOS2	16.0132	1	0.0001	0.000144503
HECTD4	15.6689	4	1e-05	1.55056e-05
EFCAB4A	15.4596	2	1e-05	1.55056e-05
ARHGAP21	15.1332	2	1e-05	1.55056e-05
CCDC88B	14.8641	5	0.0002	0.000273267
ZNF318	14.7637	1	0.0002	0.000273267
ANKRD26	14.7396	1	0.0002	0.000273267
GREB1L	14.7396	2	0.0002	0.000273267
MIBP1	14.7396	1	0.0002	0.000273267
RPRD2	14.5384	2	0.0002	0.000273267
ANKRD32	14.5028	1	0.0002	0.000273267
DNAH7	14.2605	1	0.0002	0.000273267
RBM5	14.2335	3	0.0002	0.000273267
UNC45B	14.1915	3	0.0002	0.000273267
EP400	14.1153	3	0.0002	0.000273267
RELN	13.9631	3	0.0003	0.0003713
DKFZp686L19178	13.9174	1	0.0003	0.0003713
NFAT5	13.9174	5	0.0003	0.0003713
TOP1	13.9174	2	0.0003	0.0003713
FAM186A	13.8462	2	0.0003	0.0003713
TNRC18	13.6775	4	0.0003	0.0003713
SDCBP2	13.4511	2	0.0003	0.0003713
NRXN2	13.3709	4	0.0003	0.0003713
STRIP2	13.1652	4	0.0003	0.0003713
CACNA1D	13.0637	4	0.0003	0.0003713
DKFZp686E2459	13.0637	1	0.0003	0.0003713
FGF2	13.0637	1	0.0003	0.0003713
IRF8	13.0637	3	0.0003	0.0003713
JAK3	13.0637	1	0.0003	0.0003713
OBSL1	13.0637	1	0.0003	0.0003713
OSGEPL1	13.0637	1	0.0003	0.0003713
PLIN4	13.0637	4	0.0003	0.0003713
RPS6KA2	13.0637	1	0.0003	0.0003713
TXNRD2	13.0637	1	0.0003	0.0003713
WDTC1	13.0637	2	0.0003	0.0003713
YTHDC2	13.0637	1	0.0003	0.0003713
ZCCHC11	12.7665	8	0.0005	0.000579832
HSPG2	12.7642	1	0.0005	0.000579832
FLJ10357	12.679	2	0.0005	0.000579832
CROCC	12.4956	1	0.0005	0.000579832
MAST2	12.4873	5	0.0005	0.000579832
ATRX	12.4582	11	0.0005	0.000579832
FHL1	12.441	13	0.0005	0.000579832
RNF40	12.4126	3	0.0005	0.000579832
DCAF11	12.1627	1	0.0005	0.000579832
EID2	12.1627	1	0.0005	0.000579832
KANK1	12.1627	1	0.0005	0.000579832
LY75-CD302	12.1627	1	0.0005	0.000579832
PREX1	12.1627	1	0.0005	0.000579832
RRP12	12.1627	3	0.0005	0.000579832
SEC16A	12.1627	1	0.0005	0.000579832
TBC1D31	11.7216	4	0.0009	0.00101388
CKMT1B	11.602	2	0.0009	0.00101388
CORO6	11.602	3	0.0009	0.00101388
FREM1	11.602	2	0.0009	0.00101388
MYO9A	11.602	1	0.0009	0.00101388
ZNF219	11.602	2	0.0009	0.00101388
DNAH12	11.037	1	0.0009	0.00101388
BRD3	10.91	1	0.002	0.0021992
COL1A1	10.91	1	0.002	0.0021992
BAZ2B	10.8552	15	0.002	0.0021992
DOCK6	10.8552	2	0.002	0.0021992
TBC1D15	10.6659	7	0.002	0.0021992
FLG	10.4868	4	0.002	0.0021992
CHTF18	9.49718	1	0.003	0.0038904
FANCI	9.49718	3	0.003	0.0038904
HEATR5B	9.49718	1	0.003	0.0038904
LETM1	9.49718	1	0.003	0.0038904
MLK4	9.49718	1	0.003	0.0038904
MYOM3	9.49718	2	0.003	0.0038904
PI4KA	9.49718	1	0.003	0.0038904
PIK4CA	9.49718	1	0.003	0.0038904
SPATA31C1	9.49718	1	0.003	0.0038904
TEP1	9.49718	1	0.003	0.0038904
THUMPD1	9.49718	1	0.003	0.0038904
ULK3	9.49718	1	0.003	0.0038904
WDFY3	9.49718	1	0.003	0.0038904
COL24A1	9.38519	1	0.003	0.0038904
FXR1	9.31065	3	0.003	0.0038904
GVINP1	9.31065	1	0.003	0.0038904
TCOF1	9.2292	3	0.003	0.0038904
C17orf97	9.22212	2	0.003	0.0038904
CCDC171	9.22212	2	0.003	0.0038904
CKMT1A	9.22212	1	0.003	0.0038904
MYH2	9.22212	1	0.003	0.0038904
RGPD4	9.22212	2	0.003	0.0038904
WDR52	9.22212	1	0.003	0.0038904
ZZEF1	9.22212	3	0.003	0.0038904
ATAD3A	9.20129	1	0.003	0.0038904
