# Supplementary material for: The plasma peptides of sepsis
Source: Clin Proteomics. 2020 Jul 2;17:26. doi: 10.1186/s12014-020-09288-5 (PMC7331219; doi:10.1186/s12014-020-09288-5)
Supplement: Supplementary file 3 — Additional file 3: Table S3. Gene Ontology distributions of the Chi square data from corrected frequency that differ by at least 10 observations and a Chi square χ2 > 9. Network statistics: number of nodes, 484; number of edges, 1147; average node degree, 4.74; avg. local clustering coefficient, 0.324; expected number of edges, 850; PPI enrichment p-value: < 1.0e−16. [file 12014_2020_9288_MOESM3_ESM.xlsx]

## Sheet: Sheet1
TRYP_Gene_Symbol	Sepsis_X2	Gene_Symbol_n	p-value	q-value
POTEB	210.5	2	1e-05	1.56497e-05
POTEB2	196	1	1e-05	1.56497e-05
CTNNA1	178.667	3	1e-05	1.56497e-05
U2SURP	178	3	1e-05	1.56497e-05
KIF24	146.863	4	1e-05	1.56497e-05
NLGN2	144	2	1e-05	1.56497e-05
ITIH3	139.4	5	1e-05	1.56497e-05
KSR1	132.903	8	1e-05	1.56497e-05
GTF2H1	121	2	1e-05	1.56497e-05
KIT	121	1	1e-05	1.56497e-05
RPS6KL1	114.548	7	1e-05	1.56497e-05
VAV2	111.783	4	1e-05	1.56497e-05
HSPA7	100	1	1e-05	1.56497e-05
SMC2	100	1	1e-05	1.56497e-05
TCEB3B	100	1	1e-05	1.56497e-05
ZNF300	100	1	1e-05	1.56497e-05
SUPV3L1	83.7501	2	1e-05	1.56497e-05
ADAMTS20	76.5815	2	1e-05	1.56497e-05
LAMB4	76.5815	2	1e-05	1.56497e-05
SAA2	71.5005	1	1e-05	1.56497e-05
SAA1	71.0808	4	1e-05	1.56497e-05
MCCC1	69.066	2	1e-05	1.56497e-05
SUPT6H	65.3445	2	1e-05	1.56497e-05
SCN9A	61.4965	4	1e-05	1.56497e-05
SBNO1	60.2647	2	1e-05	1.56497e-05
EPHA1	57.5413	3	1e-05	1.56497e-05
ABLIM2	55.6978	2	1e-05	1.56497e-05
cB5E3.2	55.6978	1	1e-05	1.56497e-05
EPHA10	55.6978	2	1e-05	1.56497e-05
GRIN2B	55.6978	1	1e-05	1.56497e-05
HIVEP2	54.449	1	1e-05	1.56497e-05
CCL16	53.7859	1	1e-05	1.56497e-05
TKT	52.3577	4	1e-05	1.56497e-05
LRP2	52.3311	2	1e-05	1.56497e-05
TMF1	51.9285	2	1e-05	1.56497e-05
HECTD3	49.5426	2	1e-05	1.56497e-05
TSHR	48.516	3	1e-05	1.56497e-05
EXD3	47.4958	1	1e-05	1.56497e-05
HFM1	47.1351	4	1e-05	1.56497e-05
PATZ1	46.5002	1	1e-05	1.56497e-05
STRIP2	46.5002	2	1e-05	1.56497e-05
ZNF556	46.5002	2	1e-05	1.56497e-05
REM2	46.4117	4	1e-05	1.56497e-05
GRAMD1B	43.8234	8	1e-05	1.56497e-05
UHRF1	43.7108	3	1e-05	1.56497e-05
TAF15	43.3921	4	1e-05	1.56497e-05
SBK1	42.3161	2	1e-05	1.56497e-05
GPR98	41.9662	1	1e-05	1.56497e-05
CCT2	40.5912	4	1e-05	1.56497e-05
DIP2A	38.7953	3	1e-05	1.56497e-05
GRIN2D	38.7953	1	1e-05	1.56497e-05
ACAN	38.132	2	1e-05	1.56497e-05
ADAMTS7	38.132	1	1e-05	1.56497e-05
ADCY9	38.132	1	1e-05	1.56497e-05
CCRN4L	38.132	1	1e-05	1.56497e-05
DNA2	38.132	1	1e-05	1.56497e-05
FAM120B	38.132	2	1e-05	1.56497e-05
FEZF1	38.132	1	1e-05	1.56497e-05
LONRF2	38.132	1	1e-05	1.56497e-05
LRRC16A	38.132	1	1e-05	1.56497e-05
MTCH1	38.132	1	1e-05	1.56497e-05
NLRP2	38.132	1	1e-05	1.56497e-05
PITPNM3	38.132	3	1e-05	1.56497e-05
PKP4	38.132	3	1e-05	1.56497e-05
PTPLB	38.132	1	1e-05	1.56497e-05
RBM17	38.132	1	1e-05	1.56497e-05
RGS22	38.132	1	1e-05	1.56497e-05
SPNS2	38.132	1	1e-05	1.56497e-05
WDR44	38.132	1	1e-05	1.56497e-05
ZNF107	38.132	1	1e-05	1.56497e-05
AGL	37.5294	4	1e-05	1.56497e-05
SDK2	37.1104	2	1e-05	1.56497e-05
GIT1	33.2461	3	1e-05	1.56497e-05
GTPBP2	32.6853	1	1e-05	1.56497e-05
MED1	32.6853	1	1e-05	1.56497e-05
RNASEL	32.6853	2	1e-05	1.56497e-05
SOX6	32.6853	2	1e-05	1.56497e-05
CAND1	31.0117	1	1e-05	1.56497e-05
FBN1	30.7483	3	1e-05	1.56497e-05
BCL11A	30.7378	4	1e-05	1.56497e-05
SMG1	30.3187	7	1e-05	1.56497e-05
KANK1	30.1078	10	1e-05	1.56497e-05
EYS	29.8919	2	1e-05	1.56497e-05
PHLDB2	29.765	4	1e-05	1.56497e-05
CNOT10	29.5781	3	1e-05	1.56497e-05
FLJ21069	28.8708	1	1e-05	1.56497e-05
CLIP4	28.8518	6	1e-05	1.56497e-05
KIF27	28.6345	9	1e-05	1.56497e-05
DNAH11	28.5921	4	1e-05	1.56497e-05
PTPRA	27.697	3	1e-05	1.56497e-05
DDX11	27.5664	5	1e-05	1.56497e-05
AF-4	27.0986	1	1e-05	1.56497e-05
DKFZp781D08126	27.0986	1	1e-05	1.56497e-05
GCK	27.0986	5	1e-05	1.56497e-05
HSPA6	27.0986	1	1e-05	1.56497e-05
PPP1R13B	27.0986	3	1e-05	1.56497e-05
SAMD11	26.9372	4	1e-05	1.56497e-05
HES6	26.8416	1	1e-05	1.56497e-05
PREX2	26.8416	1	1e-05	1.56497e-05
RASA3	26.8352	3	1e-05	1.56497e-05
FLNA	26.5408	8	1e-05	1.56497e-05
ATP4A	26.4531	1	1e-05	1.56497e-05
CDK5RAP2	26.4531	1	1e-05	1.56497e-05
DKFZp566H1924	26.4531	1	1e-05	1.56497e-05
DKFZp666G172	26.4531	1	1e-05	1.56497e-05
ANKRD12	26.0677	5	1e-05	1.56497e-05
AIM1L	25.5214	1	1e-05	1.56497e-05
DLGAP5	25.4838	1	1e-05	1.56497e-05
SDCBP2	24.5668	2	1e-05	1.56497e-05
FXR1	24.5505	6	1e-05	1.56497e-05
COL24A1	24.4401	1	1e-05	1.56497e-05
XYLT1	24.1348	1	1e-05	1.56497e-05
DNAH2	23.6066	1	1e-05	1.56497e-05
RSBN1	22.3081	1	1e-05	1.56497e-05
CUL4B	22.1478	3	1e-05	1.56497e-05
DOCK6	22.1478	1	1e-05	1.56497e-05
EML4-ALK	22.1478	1	1e-05	1.56497e-05
GLDN	22.1478	1	1e-05	1.56497e-05
IFT140	22.1478	1	1e-05	1.56497e-05
LRRC9	22.1478	1	1e-05	1.56497e-05
MLLT1	22.0914	2	1e-05	1.56497e-05
AARS	22.035	2	1e-05	1.56497e-05
CACNB2	22.035	1	1e-05	1.56497e-05
CAMTA1	22.035	1	1e-05	1.56497e-05
CIITA	22.035	11	1e-05	1.56497e-05
CWC15	22.035	2	1e-05	1.56497e-05
GAS2L3	22.035	2	1e-05	1.56497e-05
PPP1R15A	22.035	1	1e-05	1.56497e-05
RAPGEF5	22.035	1	1e-05	1.56497e-05
SEL1L3	22.035	4	1e-05	1.56497e-05
SGSM2	22.035	2	1e-05	1.56497e-05
SLIT2	22.035	1	1e-05	1.56497e-05
TEX2	22.035	1	1e-05	1.56497e-05
TOP3A	22.035	1	1e-05	1.56497e-05
ZNF185	22.035	2	1e-05	1.56497e-05
ZSCAN31	22.035	1	1e-05	1.56497e-05
TTC3	20.7972	1	1e-05	1.56497e-05
LRP1B	20.6606	1	1e-05	1.56497e-05
PKN3	20.5108	5	1e-05	1.56497e-05
MARK3	20.4747	10	1e-05	1.56497e-05
CENPE	20.2649	2	1e-05	1.56497e-05
TXNRD2	20.1298	2	1e-05	1.56497e-05
ZNF609	20.0827	1	1e-05	1.56497e-05
GIGYF2	19.9035	4	1e-05	1.56497e-05
NPTN	19.5547	2	1e-05	1.56497e-05
CLASP1	19.4054	5	1e-05	1.56497e-05
GPR101	19.4042	1	1e-05	1.56497e-05
KIDINS220	19.4042	1	1e-05	1.56497e-05
VCP	19.4042	1	1e-05	1.56497e-05
ZNF441	19.4042	2	1e-05	1.56497e-05
ZNF462	19.4042	1	1e-05	1.56497e-05
SPEG	19.3691	2	1e-05	1.56497e-05
CASP7	19.1523	3	1e-05	1.56497e-05
MICAL3	18.4052	7	1e-05	1.56497e-05
AFF1	18.2246	1	1e-05	1.56497e-05
CBX6	18.2246	1	1e-05	1.56497e-05
CHMP7	18.2246	2	1e-05	1.56497e-05
DENND5B	18.2246	1	1e-05	1.56497e-05
DKFZp451G231	18.2246	1	1e-05	1.56497e-05
LRIF1	18.2246	2	1e-05	1.56497e-05
MTUS1	18.2246	2	1e-05	1.56497e-05
NRF	18.2246	1	1e-05	1.56497e-05
PHF20L1	18.2246	1	1e-05	1.56497e-05
RARG	18.2246	1	1e-05	1.56497e-05
SH3PXD2B	18.2246	1	1e-05	1.56497e-05
SOGA3	18.2246	2	1e-05	1.56497e-05
WDR62	18.2246	1	1e-05	1.56497e-05
MDN1	18.197	2	1e-05	1.56497e-05
OPA1	17.9419	8	1e-05	1.56497e-05
LY75-CD302	17.7706	2	1e-05	1.56497e-05
MACF1	17.4493	34	1e-05	1.56497e-05
CC2D1A	17.226	3	1e-05	1.56497e-05
KIAA0430	17.1225	3	1e-05	1.56497e-05
FAT1	17.0834	2	1e-05	1.56497e-05
STXBP2	17.0834	1	1e-05	1.56497e-05
MPDZ	16.8063	8	1e-05	1.56497e-05
PRG4	16.7741	5	1e-05	1.56497e-05
FAT3	16.6353	3	0.0001	0.000143523
ZNF729	16.5905	2	0.0001	0.000143523
RASIP1	16.5545	5	0.0001	0.000143523
COL6A5	16.4298	5	0.0001	0.000143523
TRPM2	16.2373	3	0.0001	0.000143523
ALS2CR11	16.137	2	0.0001	0.000143523
CCDC141	16.137	1	0.0001	0.000143523
HEATR1	16.137	1	0.0001	0.000143523
LY75	16.137	1	0.0001	0.000143523
PHLPP1	16.137	1	0.0001	0.000143523
VPS13C	16.1132	4	0.0001	0.000143523
GRIN2A	15.8401	5	0.0001	0.000143523
SMEK1	15.8383	8	0.0001	0.000143523
MYO5A	15.6426	6	0.0001	0.000143523
FAM208B	15.5816	4	0.0001	0.000143523
LRRIQ1	15.248	3	0.0001	0.000143523
BLM	14.8668	1	0.0002	0.000277
MRPL10	14.8668	3	0.0002	0.000277
MYO1H	14.8668	2	0.0002	0.000277
MAP4	14.7721	4	0.0002	0.000277
RIMBP3C	14.4323	2	0.0002	0.000277
CACNA1E	14.2055	4	0.0002	0.000277
FAM186A	14.0486	2	0.0002	0.000277
SMG6	13.945	5	0.0003	0.000367699
TACC3	13.5704	2	0.0003	0.000367699
ARID4B	13.5064	1	0.0003	0.000367699
CEP135	13.5064	2	0.0003	0.000367699
CENPC	13.1708	2	0.0003	0.000367699
CENPC1	13.1708	1	0.0003	0.000367699
CYP11B2	13.1708	1	0.0003	0.000367699
DCDC1	13.1708	1	0.0003	0.000367699
DKFZp451N061	13.1708	1	0.0003	0.000367699
FN1	13.1708	16	0.0003	0.000367699
FNIP2	13.1708	1	0.0003	0.000367699
KIAA1244	13.1708	1	0.0003	0.000367699
LLGL2	13.1708	1	0.0003	0.000367699
LOC101930111	13.1708	1	0.0003	0.000367699
MAST1	13.1708	1	0.0003	0.000367699
MYO10	13.1708	2	0.0003	0.000367699
MYO6	13.1708	1	0.0003	0.000367699
MYOM2	13.1708	1	0.0003	0.000367699
RB1	13.1708	1	0.0003	0.000367699
SETBP1	13.1708	1	0.0003	0.000367699
SETD1A	13.1708	1	0.0003	0.000367699
SNTB1	13.1708	1	0.0003	0.000367699
TAX1BP1	13.1708	4	0.0003	0.000367699
TENM3	13.1708	1	0.0003	0.000367699
TOR4A	13.1708	1	0.0003	0.000367699
CEP164	13.1516	6	0.0003	0.000367699
MYH3	12.9781	1	0.0005	0.000574689
DIDO1	12.9088	1	0.0005	0.000574689
GPR179	12.9088	1	0.0005	0.000574689
MIBP1	12.9088	1	0.0005	0.000574689
CPS1	12.747	7	0.0005	0.000574689
DMXL1	12.4217	7	0.0005	0.000574689
DDX31	12.274	1	0.0005	0.000574689
EFCAB5	12.274	2	0.0005	0.000574689
IKBKE	12.274	1	0.0005	0.000574689
MIA3	12.274	4	0.0005	0.000574689
RAI1	12.274	1	0.0005	0.000574689
RIPK1	12.274	2	0.0005	0.000574689
SBF1	12.274	2	0.0005	0.000574689
SPATA13	12.274	2	0.0005	0.000574689
KCNG3	12.1515	2	0.0005	0.000574689
UNC13A	11.9528	5	0.0009	0.000989286
CACNA1I	11.8291	5	0.0009	0.000989286
DOS	11.7179	1	0.0009	0.000989286
MLL	11.7179	2	0.0009	0.000989286
SMC4	11.7179	3	0.0009	0.000989286
COL16A1	11.3698	3	0.0009	0.000989286
PLCE1	11.3698	2	0.0009	0.000989286
RIMBP3B	11.3698	1	0.0009	0.000989286
FBXO41	11.158	1	0.0009	0.000989286
SOGA1	11.0173	2	0.0009	0.000989286
DNAH5	11.0084	2	0.0009	0.000989286
OBSL1	10.9605	7	0.002	0.002139
CENPT	10.7019	4	0.002	0.002139
SPTBN1	10.7019	4	0.002	0.002139
VPS8	10.5726	4	0.002	0.002139
SRRT	10.4359	9	0.002	0.002139
PARP8	10.3517	2	0.002	0.002139
IGF2BP1	10.3492	3	0.002	0.002139
SLTM	9.63694	3	0.003	0.0038904
COL6A3	9.59846	1	0.003	0.0038904
CROCC	9.51806	2	0.003	0.0038904
ANKRD36C	9.42084	1	0.003	0.0038904
TCOF1	9.42042	3	0.003	0.0038904
MAGI3	9.41704	2	0.003	0.0038904
MYO5C	9.41704	1	0.003	0.0038904
PAICS	9.41704	1	0.003	0.0038904
C3	9.35134	1	0.003	0.0038904
GCN1L1	9.35134	2	0.003	0.0038904
MAP7D1	9.35134	1	0.003	0.0038904
PRIC295	9.35134	1	0.003	0.0038904
ANKRD36	9.3337	1	0.003	0.0038904
DKFZP586J0619	9.3337	1	0.003	0.0038904
DKFZp686M1993	9.3337	1	0.003	0.0038904
RAPGEF6	9.3337	1	0.003	0.0038904
TDRD3	9.3337	3	0.003	0.0038904
SACS	9.19713	2	0.003	0.0038904
